# Supplementary material for: Effects of Combination Lipid Therapy in Type 2 Diabetes Mellitus
Source: Atypon-hosted journal article supplement (doi:10.1056/nejmoa1001282), 2010-03-14
Supplement: nejmoa1001282_disclosures.pdf [file nejmoa1001282_disclosures.pdf]

## ICMJE Uniform Disclosure Form for Potential Conflicts of Interest

### INSTRUCTIONS:

The purpose of this form is to provide readers of your manuscript with information about your other interests that could influence how they receive and understand your work. The form has five parts.

#### 1. Identifying information.

Each author should submit a separate form. Provide complete information and double-check the manuscript number. If you are NOT the corresponding author please insert his or her name.

#### 2. The work under consideration for publication.

Please provide information about the work that you have submitted for publication. The time frame for this reporting is that of the work itself, from the initial conception and planning to the present. The idea is to provide for the reader information about resources that you received, either directly or indirectly (via your institution), to enable you to complete the work. If you check the "No" box it means that you did the work without receiving any financial support from any third party -- that is, the work was supported by funds from the same institution that pays your salary and that institution did not receive third-party funds to pay you. If you or your institution did receive funds from a third party to support the work, check "Yes" along with the appropriate boxes to indicate the type of support and whether you or your institution received it.

#### 3. Relevant financial activities outside the submitted work.

Please report all sources of revenue relevant to the submitted work that accrued either directly to you or were paid to your institution on your behalf over the 36 months prior to submission of the work. This should include all monies from sources with relevance to the submitted work, not just monies from the entity that sponsored the research. If there is any question, it is usually better to disclose a relationship than not to do so. Please note that your interactions with the work's sponsor outside the submitted work should be listed here. For each category list each entity on a separate line. Use as many lines as necessary to provide complete information. In addition, please disclose relationships that fall outside the 36-month window that readers may want to know about and could reasonably criticize you for not disclosing (for example, long-term financial relationships that are now ended).

The goal of this section is to provide information for our reviewers and readers about your interactions with entities in the biomedical arena that could be perceived to influence, or that give the appearance of potentially influencing, what you wrote in the submitted work. You should disclose interactions with ANY entity that could be considered broadly relevant to the work. For example, if your article is about testing an epidermal growth factor receptor (EGFR) antagonist in lung cancer, you should report all associations with entities pursuing diagnostic or therapeutic strategies in cancer in general, not just in the area of EGFR or lung cancer. For grants you have received for work outside the submitted work, you should disclose support ONLY from entities that could be perceived to benefit financially from the published work, such as drug companies, or foundations supported by entities that could be perceived to have a financial stake in the outcome. Public funding sources, such as the NIH or the MRC, need not be disclosed. For example, if the NIH sponsored a piece of work you have been involved in but drugs were provided by a pharmaceutical company, you need only list the pharmaceutical company.

#### 4. Financial relationships involving your spouse or partner or your children (under 18 years of age).

If monies from the types of relationships listed in Section 3 were paid to your spouse or partner or dependent children, please list the type of activity and source of the money.

#### 5. Nonfinancial associations.

Please report any personal, professional, political, institutional, religious, or other associations that a reasonable reader would want to know about in relation to the submitted work.

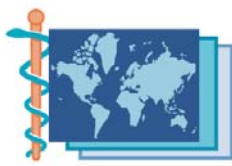

## ICMJE Uniform Disclosure Form for Potential Conflicts of Interest

### Section 1. Identifying Information.

Given Name:  Surname:  Effective Date:

(or first)

(or last)

Format example: 07-August-2008

Format example: 07-August-2008

Are you the corresponding author?  Yes  No

Corresponding author's name:

Manuscript Title:

Manuscript Identifying Number (if you know it):

### Section 2. Information about the support of the work under consideration for publication.

Did you or your institution at any time receive payment or support in kind for any aspect of the submitted work (including but not limited to grants, data monitoring board, study design, manuscript preparation, statistical analysis, etc...)?

No

Yes, specify nature of compensation

### Section 3. Information about relevant financial relationships outside the submitted work.

Place a check in the appropriate boxes in the table to indicate whether you have financial relationships (regardless of amount of compensation) with any entities that have an interest related to the submitted work. Use one line for each entity; add as many lines as you need. Use the comments column to indicate any additional information that you think a reader or editor would want to know about the compensation. Report relationships that were present during the 36 months prior to submission. In addition please disclose relationships that fall outside the 36-month window that readers may want to know about and could reasonably criticize you for not disclosing (for example, long-term financial relationships that are now ended).

If you have more than one relationship, click "Add +" to add a row. Click "Del x" to delete an extra row.

| Type of Relationship (in alphabetical order) | No                                  | Money Paid to You                   | Money to Your institution | Entity | Comments       |       |
|----------------------------------------------|-------------------------------------|-------------------------------------|---------------------------|--------|----------------|-------|
| Board membership                             | <input checked="" type="checkbox"/> | <input type="checkbox"/>            | <input type="checkbox"/>  |        |                | Del x |
|                                              |                                     |                                     |                           |        |                | Add + |
| Consultancy                                  | <input type="checkbox"/>            | <input checked="" type="checkbox"/> | <input type="checkbox"/>  | Merck  | Safety Board   | Del x |
| Consultancy                                  | <input type="checkbox"/>            | <input checked="" type="checkbox"/> | <input type="checkbox"/>  | Roche  | DSMB for trial | Del x |
|                                              |                                     |                                     |                           |        |                | Add + |
| Employment                                   | <input checked="" type="checkbox"/> | <input type="checkbox"/>            | <input type="checkbox"/>  |        |                | Del x |
|                                              |                                     |                                     |                           |        |                | Add + |



**ICMJE Uniform Disclosure Form for Potential Conflicts of Interest**

| Type of Relationship<br>(in alphabetical order)                                                      | No                                  | Money<br>Paid to<br>You             | Money to<br>Your<br>institution | Entity       | Comments                         |       |
|------------------------------------------------------------------------------------------------------|-------------------------------------|-------------------------------------|---------------------------------|--------------|----------------------------------|-------|
| Expert testimony                                                                                     | <input checked="" type="checkbox"/> | <input type="checkbox"/>            | <input type="checkbox"/>        |              |                                  | Del × |
|                                                                                                      |                                     |                                     |                                 |              |                                  | Add + |
| Gifts                                                                                                | <input checked="" type="checkbox"/> | <input type="checkbox"/>            | <input type="checkbox"/>        |              |                                  | Del × |
|                                                                                                      |                                     |                                     |                                 |              |                                  | Add + |
| Grants/grants pending                                                                                | <input checked="" type="checkbox"/> | <input type="checkbox"/>            | <input type="checkbox"/>        |              |                                  | Del × |
|                                                                                                      |                                     |                                     |                                 |              |                                  | Add + |
| Honoraria                                                                                            | <input checked="" type="checkbox"/> | <input type="checkbox"/>            | <input type="checkbox"/>        |              |                                  | Del × |
|                                                                                                      |                                     |                                     |                                 |              |                                  | Add + |
| Payment for manuscript<br>preparation                                                                | <input checked="" type="checkbox"/> | <input type="checkbox"/>            | <input type="checkbox"/>        |              |                                  | Del × |
|                                                                                                      |                                     |                                     |                                 |              |                                  | Add + |
| Patents (planned, pending or<br>issued)                                                              | <input type="checkbox"/>            | <input checked="" type="checkbox"/> | <input type="checkbox"/>        | MIT          | software for risk stratification | Del × |
|                                                                                                      |                                     |                                     |                                 |              |                                  | Add + |
| Royalties                                                                                            | <input type="checkbox"/>            | <input checked="" type="checkbox"/> | <input type="checkbox"/>        | MIT          | software for risk stratification | Del × |
|                                                                                                      |                                     |                                     |                                 |              |                                  | Add + |
| Payment for development of<br>educational presentations<br>including service on speakers'<br>bureaus | <input checked="" type="checkbox"/> | <input type="checkbox"/>            | <input type="checkbox"/>        |              |                                  | Del × |
|                                                                                                      |                                     |                                     |                                 |              |                                  | Add + |
| Stock/stock options                                                                                  | <input checked="" type="checkbox"/> | <input type="checkbox"/>            | <input type="checkbox"/>        |              |                                  | Del × |
|                                                                                                      |                                     |                                     |                                 |              |                                  | Add + |
| Travel/accommodations<br>expenses covered or<br>reimbursed                                           | <input type="checkbox"/>            | <input checked="" type="checkbox"/> | <input type="checkbox"/>        | Merck, Roche | travel to business meetings      | Del × |
|                                                                                                      |                                     |                                     |                                 |              |                                  | Add + |
| Other (err on the side of full<br>disclosure)                                                        | <input checked="" type="checkbox"/> | <input type="checkbox"/>            | <input type="checkbox"/>        |              |                                  | Del × |
|                                                                                                      |                                     |                                     |                                 |              |                                  | Add + |

## **ICMJE Uniform Disclosure Form for Potential Conflicts of Interest**

### **Section 4. Information about financial relationships involving your spouse or partner or your children (under 18 years of age).**

Do your children or your spouse or partner have financial relationships with entities that have an interest in the content of the submitted work?

- No other relationships/conditions/circumstances that present potential conflict of interest
- Yes, the following relationships/conditions/circumstances are present (explain below):

### **Section 5. Information about relevant nonfinancial associations.**

Do you have any relevant nonfinancial associations or interests (personal, professional, political, institutional, religious, or other) that a reasonable reader would want to know about in relation to the submitted work?

- No relevant nonfinancial relationships/conditions/circumstances to report.
- Yes, the following relevant nonfinancial relationships/conditions/circumstances are present (explain below):

At the time of manuscript acceptance, journals will ask authors to confirm and, if necessary, update their disclosure statements. On occasion, journals may ask authors to disclose further information about reported relationships.

Save Form

## ICMJE Uniform Disclosure Form for Potential Conflicts of Interest

### INSTRUCTIONS:

The purpose of this form is to provide readers of your manuscript with information about your other interests that could influence how they receive and understand your work. The form has five parts.

#### 1. Identifying information.

Each author should submit a separate form. Provide complete information and double-check the manuscript number. If you are NOT the corresponding author please insert his or her name.

#### 2. The work under consideration for publication.

Please provide information about the work that you have submitted for publication. The time frame for this reporting is that of the work itself, from the initial conception and planning to the present. The idea is to provide for the reader information about resources that you received, either directly or indirectly (via your institution), to enable you to complete the work. If you check the "No" box it means that you did the work without receiving any financial support from any third party -- that is, the work was supported by funds from the same institution that pays your salary and that institution did not receive third-party funds to pay you. If you or your institution did receive funds from a third party to support the work, check "Yes" along with the appropriate boxes to indicate the type of support and whether you or your institution received it.

#### 3. Relevant financial activities outside the submitted work.

Please report all sources of revenue relevant to the submitted work that accrued either directly to you or were paid to your institution on your behalf over the 36 months prior to submission of the work. This should include all monies from sources with relevance to the submitted work, not just monies from the entity that sponsored the research. If there is any question, it is usually better to disclose a relationship than not to do so. Please note that your interactions with the work's sponsor outside the submitted work should be listed here. For each category list each entity on a separate line. Use as many lines as necessary to provide complete information. In addition, please disclose relationships that fall outside the 36-month window that readers may want to know about and could reasonably criticize you for not disclosing (for example, long-term financial relationships that are now ended).

The goal of this section is to provide information for our reviewers and readers about your interactions with entities in the biomedical arena that could be perceived to influence, or that give the appearance of potentially influencing, what you wrote in the submitted work. You should disclose interactions with ANY entity that could be considered broadly relevant to the work. For example, if your article is about testing an epidermal growth factor receptor (EGFR) antagonist in lung cancer, you should report all associations with entities pursuing diagnostic or therapeutic strategies in cancer in general, not just in the area of EGFR or lung cancer. For grants you have received for work outside the submitted work, you should disclose support ONLY from entities that could be perceived to benefit financially from the published work, such as drug companies, or foundations supported by entities that could be perceived to have a financial stake in the outcome. Public funding sources, such as the NIH or the MRC, need not be disclosed. For example, if the NIH sponsored a piece of work you have been involved in but drugs were provided by a pharmaceutical company, you need only list the pharmaceutical company.

#### 4. Financial relationships involving your spouse or partner or your children (under 18 years of age).

If monies from the types of relationships listed in Section 3 were paid to your spouse or partner or dependent children, please list the type of activity and source of the money.

#### 5. Nonfinancial associations.

Please report any personal, professional, political, institutional, religious, or other associations that a reasonable reader would want to know about in relation to the submitted work.



## ICMJE Uniform Disclosure Form for Potential Conflicts of Interest

### Section 1. Identifying Information.

Given Name:  
(or first)

John

Surname:  
(or last)

Buse

Effective Date:

10-February-2010

Format example: 07-August-2008

Are you the corresponding author?  Yes  No

Corresponding author's name:

Henry N. Ginsberg

Manuscript Title:

Effects of Combination Lipid Therapy on Cardiovascular Events in Type 2 Diabetes Mellitus

Manuscript Identifying Number (if you know it):

### Section 2. Information about the support of the work under consideration for publication.

Did you or your institution at any time receive payment or support in kind for any aspect of the submitted work (including but not limited to grants, data monitoring board, study design, manuscript preparation, statistical analysis, etc...)?

No

Yes, specify nature of compensation

If you have more than one relationship, click "Add +" to add a row. Click "Del x" to delete an extra row.

| Type                                                                                                                                 | Money Paid to You*                  |                                     | Money to Your Institution           |                                     | Name of Entity                | Comments**                     |       |
|--------------------------------------------------------------------------------------------------------------------------------------|-------------------------------------|-------------------------------------|-------------------------------------|-------------------------------------|-------------------------------|--------------------------------|-------|
|                                                                                                                                      | No                                  | Yes                                 | No                                  | Yes                                 |                               |                                |       |
| Grant                                                                                                                                | <input checked="" type="checkbox"/> | <input type="checkbox"/>            | <input type="checkbox"/>            | <input checked="" type="checkbox"/> | National Institutes of Health | through Wake Forest University | Del x |
|                                                                                                                                      |                                     |                                     |                                     |                                     |                               |                                | Add + |
| Consulting fee or honorarium                                                                                                         | <input checked="" type="checkbox"/> | <input type="checkbox"/>            | <input checked="" type="checkbox"/> | <input type="checkbox"/>            |                               |                                | Del x |
|                                                                                                                                      |                                     |                                     |                                     |                                     |                               |                                | Add + |
| Support for travel to meetings for the study or otherwise                                                                            | <input type="checkbox"/>            | <input checked="" type="checkbox"/> | <input checked="" type="checkbox"/> | <input type="checkbox"/>            | National Institutes of Health | through Wake Forest University | Del x |
|                                                                                                                                      |                                     |                                     |                                     |                                     |                               |                                | Add + |
| Fees for participation in review activities such as data monitoring boards, statistical analysis, end point committees, and the like | <input checked="" type="checkbox"/> | <input type="checkbox"/>            | <input type="checkbox"/>            | <input checked="" type="checkbox"/> | National Institutes of Health | through Wake Forest University | Del x |



**ICMJE Uniform Disclosure Form for Potential Conflicts of Interest**

| Type                                                                                                                                 | Money Paid to You*                  |                          | Money to Your Institution           |                                     | Name of Entity                | Comments**                     |       |
|--------------------------------------------------------------------------------------------------------------------------------------|-------------------------------------|--------------------------|-------------------------------------|-------------------------------------|-------------------------------|--------------------------------|-------|
| Fees for participation in review activities such as data monitoring boards, statistical analysis, end point committees, and the like | <input checked="" type="checkbox"/> | <input type="checkbox"/> | <input type="checkbox"/>            | <input checked="" type="checkbox"/> | National Institutes of Health | through Wake Forest University | Del × |
|                                                                                                                                      |                                     |                          |                                     |                                     |                               |                                | Add + |
| Payment for writing or reviewing the manuscript                                                                                      | <input checked="" type="checkbox"/> | <input type="checkbox"/> | <input type="checkbox"/>            | <input checked="" type="checkbox"/> | National Institutes of Health | through Wake Forest University | Del × |
|                                                                                                                                      |                                     |                          |                                     |                                     |                               |                                | Add + |
| Support in kind such as writing, provision of medicines or equipment, or administrative support                                      | <input checked="" type="checkbox"/> | <input type="checkbox"/> | <input type="checkbox"/>            | <input checked="" type="checkbox"/> | National Institutes of Health | through Wake Forest University | Del × |
|                                                                                                                                      |                                     |                          |                                     |                                     |                               |                                | Add + |
| Other                                                                                                                                | <input checked="" type="checkbox"/> | <input type="checkbox"/> | <input checked="" type="checkbox"/> | <input type="checkbox"/>            |                               |                                | Del × |
|                                                                                                                                      |                                     |                          |                                     |                                     |                               |                                | Add + |

\*\*Use this section to provide any needed explanation

**Section 3. Information about relevant financial relationships outside the submitted work.**

Place a check in the appropriate boxes in the table to indicate whether you have financial relationships (regardless of amount of compensation) with any entities that have an interest related to the submitted work. Use one line for each entity; add as many lines as you need. Use the comments column to indicate any additional information that you think a reader or editor would want to know about the compensation. Report relationships that were present during the 36 months prior to submission. In addition please disclose relationships that fall outside the 36-month window that readers may want to know about and could reasonably criticize you for not disclosing (for example, long-term financial relationships that are now ended).

If you have more than one relationship, click "Add +" to add a row. Click "Del ×" to delete an extra row.

| Type of Relationship (in alphabetical order) | No                                  | Money Paid to You        | Money to Your institution           | Entity           | Comments |       |
|----------------------------------------------|-------------------------------------|--------------------------|-------------------------------------|------------------|----------|-------|
| Board membership                             | <input checked="" type="checkbox"/> | <input type="checkbox"/> | <input type="checkbox"/>            |                  |          | Del × |
|                                              |                                     |                          |                                     |                  |          | Add + |
| Consultancy                                  | <input type="checkbox"/>            | <input type="checkbox"/> | <input checked="" type="checkbox"/> | Novo Nordisk     |          | Del × |
| Consultancy                                  | <input type="checkbox"/>            | <input type="checkbox"/> | <input checked="" type="checkbox"/> | Amylin           |          | Del × |
| Consultancy                                  | <input type="checkbox"/>            | <input type="checkbox"/> | <input checked="" type="checkbox"/> | Becton-Dickinson |          | Del × |



**ICMJE Uniform Disclosure Form for Potential Conflicts of Interest**

| Type of Relationship<br>(in alphabetical order) | No                                  | Money<br>Paid to<br>You             | Money to<br>Your<br>institution     | Entity                 | Comments         |       |
|-------------------------------------------------|-------------------------------------|-------------------------------------|-------------------------------------|------------------------|------------------|-------|
| Consultancy                                     | <input type="checkbox"/>            | <input type="checkbox"/>            | <input checked="" type="checkbox"/> | Lilly                  |                  | Del × |
| Consultancy                                     | <input type="checkbox"/>            | <input type="checkbox"/>            | <input checked="" type="checkbox"/> | Hoffman LaRoche        | (now, Genentech) | Del × |
| Consultancy                                     | <input type="checkbox"/>            | <input type="checkbox"/>            | <input checked="" type="checkbox"/> | GlycoMark              |                  | Del × |
| Consultancy                                     | <input type="checkbox"/>            | <input type="checkbox"/>            | <input checked="" type="checkbox"/> | Wyeth                  |                  | Del × |
| Consultancy                                     | <input type="checkbox"/>            | <input type="checkbox"/>            | <input checked="" type="checkbox"/> | Daichi Sankyo          |                  | Del × |
| Consultancy                                     | <input type="checkbox"/>            | <input type="checkbox"/>            | <input checked="" type="checkbox"/> | Bristol-Myers Squibb   |                  | Del × |
| Consultancy                                     | <input type="checkbox"/>            | <input type="checkbox"/>            | <input checked="" type="checkbox"/> | Bayhill Therapeutics   |                  | Del × |
| Consultancy                                     | <input type="checkbox"/>            | <input type="checkbox"/>            | <input checked="" type="checkbox"/> | LipoScience            |                  | Del × |
| Consultancy                                     | <input type="checkbox"/>            | <input type="checkbox"/>            | <input checked="" type="checkbox"/> | MannKind               |                  | Del × |
| Consultancy                                     | <input type="checkbox"/>            | <input type="checkbox"/>            | <input checked="" type="checkbox"/> | Veritas                |                  | Del × |
| Consultancy                                     | <input type="checkbox"/>            | <input type="checkbox"/>            | <input checked="" type="checkbox"/> | Microslet              |                  | Del × |
| Consultancy                                     | <input type="checkbox"/>            | <input type="checkbox"/>            | <input checked="" type="checkbox"/> | GlaxoSmithKline        |                  | Del × |
| Consultancy                                     | <input type="checkbox"/>            | <input type="checkbox"/>            | <input checked="" type="checkbox"/> | Abbott                 |                  | Del × |
| Consultancy                                     | <input type="checkbox"/>            | <input type="checkbox"/>            | <input checked="" type="checkbox"/> | Exsulin                |                  | Del × |
| Consultancy                                     | <input type="checkbox"/>            | <input type="checkbox"/>            | <input checked="" type="checkbox"/> | GI Dynamics            |                  | Del × |
|                                                 |                                     |                                     |                                     |                        |                  | Add + |
| Employment                                      | <input type="checkbox"/>            | <input checked="" type="checkbox"/> | <input type="checkbox"/>            | UNC School of Medicine |                  | Del × |
|                                                 |                                     |                                     |                                     |                        |                  | Add + |
| Expert testimony                                | <input type="checkbox"/>            | <input type="checkbox"/>            | <input checked="" type="checkbox"/> | Novo Nordisk           |                  | Del × |
|                                                 |                                     |                                     |                                     |                        |                  | Add + |
| Gifts                                           | <input checked="" type="checkbox"/> | <input type="checkbox"/>            | <input type="checkbox"/>            |                        |                  | Del × |
|                                                 |                                     |                                     |                                     |                        |                  | Add + |
| Grants/grants pending                           | <input type="checkbox"/>            | <input type="checkbox"/>            | <input checked="" type="checkbox"/> | Amylin                 |                  | Del × |
| Grants/grants pending                           | <input type="checkbox"/>            | <input type="checkbox"/>            | <input checked="" type="checkbox"/> | Novo Nordisk           |                  | Del × |
| Grants/grants pending                           | <input type="checkbox"/>            | <input type="checkbox"/>            | <input checked="" type="checkbox"/> | Medtronic              |                  | Del × |
| Grants/grants pending                           | <input type="checkbox"/>            | <input type="checkbox"/>            | <input checked="" type="checkbox"/> | Lilly                  |                  | Del × |
| Grants/grants pending                           | <input type="checkbox"/>            | <input type="checkbox"/>            | <input checked="" type="checkbox"/> | Novartis               |                  | Del × |
| Grants/grants pending                           | <input type="checkbox"/>            | <input type="checkbox"/>            | <input checked="" type="checkbox"/> | Tolerex                |                  | Del × |
| Grants/grants pending                           | <input type="checkbox"/>            | <input type="checkbox"/>            | <input checked="" type="checkbox"/> | Osiris                 |                  | Del × |
| Grants/grants pending                           | <input type="checkbox"/>            | <input type="checkbox"/>            | <input checked="" type="checkbox"/> | Halozyme               |                  | Del × |
| Grants/grants pending                           | <input type="checkbox"/>            | <input type="checkbox"/>            | <input checked="" type="checkbox"/> | Pfizer                 |                  | Del × |



**ICMJE Uniform Disclosure Form for Potential Conflicts of Interest**

| Type of Relationship<br>(in alphabetical order)                                                      | No                                  | Money<br>Paid to<br>You             | Money to<br>Your<br>institution     | Entity                                            | Comments        |       |
|------------------------------------------------------------------------------------------------------|-------------------------------------|-------------------------------------|-------------------------------------|---------------------------------------------------|-----------------|-------|
| Grants/grants pending                                                                                | <input type="checkbox"/>            | <input type="checkbox"/>            | <input checked="" type="checkbox"/> | Hoffman LaRoche                                   | (now Genentech) | Del × |
| Grants/grants pending                                                                                | <input type="checkbox"/>            | <input type="checkbox"/>            | <input checked="" type="checkbox"/> | Interkrin                                         |                 | Del × |
| Grants/grants pending                                                                                | <input type="checkbox"/>            | <input type="checkbox"/>            | <input checked="" type="checkbox"/> | Merck                                             |                 | Del × |
| Grants/grants pending                                                                                | <input type="checkbox"/>            | <input type="checkbox"/>            | <input checked="" type="checkbox"/> | sanofi-aventis                                    |                 | Del × |
| Grants/grants pending                                                                                | <input type="checkbox"/>            | <input type="checkbox"/>            | <input checked="" type="checkbox"/> | Dexcom                                            |                 | Del × |
| Grants/grants pending                                                                                | <input type="checkbox"/>            | <input type="checkbox"/>            | <input checked="" type="checkbox"/> | Johnson & Johnson                                 |                 | Del × |
| Grants/grants pending                                                                                | <input type="checkbox"/>            | <input type="checkbox"/>            | <input checked="" type="checkbox"/> | National Institutes of Health                     |                 | Del × |
| Grants/grants pending                                                                                | <input type="checkbox"/>            | <input type="checkbox"/>            | <input checked="" type="checkbox"/> | Bristol-Myers Squibb                              |                 | Del × |
| Grants/grants pending                                                                                | <input type="checkbox"/>            | <input type="checkbox"/>            | <input checked="" type="checkbox"/> | Fujisawa                                          |                 | Del × |
| Grants/grants pending                                                                                | <input type="checkbox"/>            | <input type="checkbox"/>            | <input checked="" type="checkbox"/> | American Academy of<br>Family Practice Foundation |                 | Del × |
|                                                                                                      |                                     |                                     |                                     |                                                   |                 | Add + |
| Honoraria                                                                                            | <input checked="" type="checkbox"/> | <input type="checkbox"/>            | <input type="checkbox"/>            |                                                   |                 | Del × |
|                                                                                                      |                                     |                                     |                                     |                                                   |                 | Add + |
| Payment for manuscript<br>preparation                                                                | <input checked="" type="checkbox"/> | <input type="checkbox"/>            | <input type="checkbox"/>            |                                                   |                 | Del × |
|                                                                                                      |                                     |                                     |                                     |                                                   |                 | Add + |
| Patents (planned, pending or<br>issued)                                                              | <input checked="" type="checkbox"/> | <input type="checkbox"/>            | <input type="checkbox"/>            |                                                   |                 | Del × |
|                                                                                                      |                                     |                                     |                                     |                                                   |                 | Add + |
| Royalties                                                                                            | <input checked="" type="checkbox"/> | <input type="checkbox"/>            | <input type="checkbox"/>            |                                                   |                 | Del × |
|                                                                                                      |                                     |                                     |                                     |                                                   |                 | Add + |
| Payment for development of<br>educational presentations<br>including service on speakers'<br>bureaus | <input checked="" type="checkbox"/> | <input type="checkbox"/>            | <input type="checkbox"/>            |                                                   |                 | Del × |
|                                                                                                      |                                     |                                     |                                     |                                                   |                 | Add + |
| Stock/stock options                                                                                  | <input type="checkbox"/>            | <input checked="" type="checkbox"/> | <input type="checkbox"/>            | Insulet                                           |                 | Del × |
|                                                                                                      |                                     |                                     |                                     |                                                   |                 | Add + |
| Travel/accommodations<br>expenses covered or<br>reimbursed                                           | <input type="checkbox"/>            | <input checked="" type="checkbox"/> | <input type="checkbox"/>            | All of the above                                  |                 | Del × |
| Travel/accommodations<br>expenses covered or<br>reimbursed                                           | <input type="checkbox"/>            | <input checked="" type="checkbox"/> | <input type="checkbox"/>            | American Diabetes<br>Association                  |                 | Del × |

## ICMJE Uniform Disclosure Form for Potential Conflicts of Interest

| Type of Relationship<br>(in alphabetical order) | No                                  | Money<br>Paid to<br>You  | Money to<br>Your<br>institution | Entity | Comments |       |
|-------------------------------------------------|-------------------------------------|--------------------------|---------------------------------|--------|----------|-------|
|                                                 |                                     |                          |                                 |        |          | Add + |
| Other (err on the side of full disclosure)      | <input checked="" type="checkbox"/> | <input type="checkbox"/> | <input type="checkbox"/>        |        |          | Del × |
|                                                 |                                     |                          |                                 |        |          | Add + |

### Section 4. Information about financial relationships involving your spouse or partner or your children (under 18 years of age).

Do your children or your spouse or partner have financial relationships with entities that have an interest in the content of the submitted work?

- No other relationships/conditions/circumstances that present potential conflict of interest  
 Yes, the following relationships/conditions/circumstances are present (explain below):

### Section 5. Information about relevant nonfinancial associations.

Do you have any relevant nonfinancial associations or interests (personal, professional, political, institutional, religious, or other) that a reasonable reader would want to know about in relation to the submitted work?

- No relevant nonfinancial relationships/conditions/circumstances to report.  
 Yes, the following relevant nonfinancial relationships/conditions/circumstances are present (explain below):

I am or have been a member of a variety of non-profit boards: American Diabetes Association, DiabetesSisters, Taking Control of Your Diabetes

At the time of manuscript acceptance, journals will ask authors to confirm and, if necessary, update their disclosure statements. On occasion, journals may ask authors to disclose further information about reported relationships.

Save Form

## **ICMJE Uniform Disclosure Form for Potential Conflicts of Interest**

### **INSTRUCTIONS:**

The purpose of this form is to provide readers of your manuscript with information about your other interests that could influence how they receive and understand your work. The form has five parts.

#### **1. Identifying information.**

Each author should submit a separate form. Provide complete information and double-check the manuscript number. If you are NOT the corresponding author please insert his or her name.

#### **2. The work under consideration for publication.**

Please provide information about the work that you have submitted for publication. The time frame for this reporting is that of the work itself, from the initial conception and planning to the present. The idea is to provide for the reader information about resources that you received, either directly or indirectly (via your institution), to enable you to complete the work. If you check the "No" box it means that you did the work without receiving any financial support from any third party -- that is, the work was supported by funds from the same institution that pays your salary and that institution did not receive third-party funds to pay you. If you or your institution did receive funds from a third party to support the work, check "Yes" along with the appropriate boxes to indicate the type of support and whether you or your institution received it.

#### **3. Relevant financial activities outside the submitted work.**

Please report all sources of revenue relevant to the submitted work that accrued either directly to you or were paid to your institution on your behalf over the 36 months prior to submission of the work. This should include all monies from sources with relevance to the submitted work, not just monies from the entity that sponsored the research. If there is any question, it is usually better to disclose a relationship than not to do so. Please note that your interactions with the work's sponsor outside the submitted work should be listed here. For each category list each entity on a separate line. Use as many lines as necessary to provide complete information. In addition, please disclose relationships that fall outside the 36-month window that readers may want to know about and could reasonably criticize you for not disclosing (for example, long-term financial relationships that are now ended).

The goal of this section is to provide information for our reviewers and readers about your interactions with entities in the bio-medical arena that could be perceived to influence, or that give the appearance of potentially influencing, what you wrote in the submitted work. You should disclose interactions with ANY entity that could be considered broadly relevant to the work. For example, if your article is about testing an epidermal growth factor receptor (EGFR) antagonist in lung cancer, you should report all associations with entities pursuing diagnostic or therapeutic strategies in cancer in general, not just in the area of EGFR or lung cancer. For grants you have received for work outside the submitted work, you should disclose support ONLY from entities that could be perceived to benefit financially from the published work, such as drug companies, or foundations supported by entities that could be perceived to have a financial stake in the outcome. Public funding sources, such as the NIH or the MRC, need not be disclosed. For example, if the NIH sponsored a piece of work you have been involved in but drugs were provided by a pharmaceutical company, you need only list the pharmaceutical company.

#### **4. Financial relationships involving your spouse or partner or your children (under 18 years of age).**

If monies from the types of relationships listed in Section 3 were paid to your spouse or partner or dependent children, please list the type of activity and source of the money.

#### **5. Nonfinancial associations.**

Please report any personal, professional, political, institutional, religious, or other associations that a reasonable reader would want to know about in relation to the submitted work.



## ICMJE Uniform Disclosure Form for Potential Conflicts of Interest

### Section 1. Identifying Information.

Given Name:  Surname:  Effective Date:

Format example: 07-August-2008

Are you the corresponding author?  Yes  No

Corresponding author's name:

Manuscript Title:

Manuscript Identifying Number (if you know it):

### Section 2. Information about the support of the work under consideration for publication.

Did you or your institution at any time receive payment or support in kind for any aspect of the submitted work (including but not limited to grants, data monitoring board, study design, manuscript preparation, statistical analysis, etc...)?

No

Yes, specify nature of compensation

If you have more than one relationship, click "Add +" to add a row. Click "Del x" to delete an extra row.

| Type                                                                                                                                 | Money Paid to You*                  |                          | Money to Your Institution           |                                     | Name of Entity | Comments**                                                                             |       |
|--------------------------------------------------------------------------------------------------------------------------------------|-------------------------------------|--------------------------|-------------------------------------|-------------------------------------|----------------|----------------------------------------------------------------------------------------|-------|
|                                                                                                                                      | No                                  | Yes                      | No                                  | Yes                                 |                |                                                                                        |       |
| Grant                                                                                                                                | <input checked="" type="checkbox"/> | <input type="checkbox"/> | <input type="checkbox"/>            | <input checked="" type="checkbox"/> | NHLBI Contract | I am PI of the Coordinating Center at Wake Forest University for this Federal Contract | Del x |
|                                                                                                                                      |                                     |                          |                                     |                                     |                |                                                                                        | Add + |
| Consulting fee or honorarium                                                                                                         | <input checked="" type="checkbox"/> | <input type="checkbox"/> | <input checked="" type="checkbox"/> | <input type="checkbox"/>            |                |                                                                                        | Del x |
|                                                                                                                                      |                                     |                          |                                     |                                     |                |                                                                                        | Add + |
| Support for travel to meetings for the study or otherwise                                                                            | <input checked="" type="checkbox"/> | <input type="checkbox"/> | <input checked="" type="checkbox"/> | <input type="checkbox"/>            |                |                                                                                        | Del x |
|                                                                                                                                      |                                     |                          |                                     |                                     |                |                                                                                        | Add + |
| Fees for participation in review activities such as data monitoring boards, statistical analysis, end point committees, and the like | <input checked="" type="checkbox"/> | <input type="checkbox"/> | <input checked="" type="checkbox"/> | <input type="checkbox"/>            |                |                                                                                        | Del x |
|                                                                                                                                      |                                     |                          |                                     |                                     |                |                                                                                        | Add + |

## ICMJE Uniform Disclosure Form for Potential Conflicts of Interest

| Type                                                                                            | Money Paid to You*                  |                          | Money to Your Institution           |                          | Name of Entity | Comments** |       |
|-------------------------------------------------------------------------------------------------|-------------------------------------|--------------------------|-------------------------------------|--------------------------|----------------|------------|-------|
| Payment for writing or reviewing the manuscript                                                 | <input checked="" type="checkbox"/> | <input type="checkbox"/> | <input checked="" type="checkbox"/> | <input type="checkbox"/> |                |            | Del × |
|                                                                                                 |                                     |                          |                                     |                          |                |            | Add + |
| Support in kind such as writing, provision of medicines or equipment, or administrative support | <input checked="" type="checkbox"/> | <input type="checkbox"/> | <input checked="" type="checkbox"/> | <input type="checkbox"/> |                |            | Del × |
|                                                                                                 |                                     |                          |                                     |                          |                |            | Add + |
| Other                                                                                           | <input checked="" type="checkbox"/> | <input type="checkbox"/> | <input checked="" type="checkbox"/> | <input type="checkbox"/> |                |            | Del × |
|                                                                                                 |                                     |                          |                                     |                          |                |            | Add + |

\*\*Use this section to provide any needed explanation

### Section 3. Information about relevant financial relationships outside the submitted work.

Place a check in the appropriate boxes in the table to indicate whether you have financial relationships (regardless of amount of compensation) with any entities that have an interest related to the submitted work. Use one line for each entity; add as many lines as you need. Use the comments column to indicate any additional information that you think a reader or editor would want to know about the compensation. Report relationships that were present during the 36 months prior to submission. In addition please disclose relationships that fall outside the 36-month window that readers may want to know about and could reasonably criticize you for not disclosing (for example, long-term financial relationships that are now ended).

If you have more than one relationship, click "Add +" to add a row. Click "Del ×" to delete an extra row.

| Type of Relationship (in alphabetical order) | No                                  | Money Paid to You        | Money to Your institution | Entity | Comments |       |
|----------------------------------------------|-------------------------------------|--------------------------|---------------------------|--------|----------|-------|
| Board membership                             | <input checked="" type="checkbox"/> | <input type="checkbox"/> | <input type="checkbox"/>  |        |          | Del × |
|                                              |                                     |                          |                           |        |          | Add + |
| Consultancy                                  | <input checked="" type="checkbox"/> | <input type="checkbox"/> | <input type="checkbox"/>  |        |          | Del × |
|                                              |                                     |                          |                           |        |          | Add + |
| Employment                                   | <input checked="" type="checkbox"/> | <input type="checkbox"/> | <input type="checkbox"/>  |        |          | Del × |
|                                              |                                     |                          |                           |        |          | Add + |
| Expert testimony                             | <input checked="" type="checkbox"/> | <input type="checkbox"/> | <input type="checkbox"/>  |        |          | Del × |
|                                              |                                     |                          |                           |        |          | Add + |
| Gifts                                        | <input checked="" type="checkbox"/> | <input type="checkbox"/> | <input type="checkbox"/>  |        |          | Del × |



**ICMJE Uniform Disclosure Form for Potential Conflicts of Interest**

| Type of Relationship<br>(in alphabetical order)                                                      | No                                  | Money<br>Paid to<br>You  | Money to<br>Your<br>institution | Entity | Comments |       |
|------------------------------------------------------------------------------------------------------|-------------------------------------|--------------------------|---------------------------------|--------|----------|-------|
|                                                                                                      |                                     |                          |                                 |        |          | Add + |
| Grants/grants pending                                                                                | <input checked="" type="checkbox"/> | <input type="checkbox"/> | <input type="checkbox"/>        |        |          | Del × |
|                                                                                                      |                                     |                          |                                 |        |          | Add + |
| Honoraria                                                                                            | <input checked="" type="checkbox"/> | <input type="checkbox"/> | <input type="checkbox"/>        |        |          | Del × |
|                                                                                                      |                                     |                          |                                 |        |          | Add + |
| Payment for manuscript<br>preparation                                                                | <input checked="" type="checkbox"/> | <input type="checkbox"/> | <input type="checkbox"/>        |        |          | Del × |
|                                                                                                      |                                     |                          |                                 |        |          | Add + |
| Patents (planned, pending or<br>issued)                                                              | <input checked="" type="checkbox"/> | <input type="checkbox"/> | <input type="checkbox"/>        |        |          | Del × |
|                                                                                                      |                                     |                          |                                 |        |          | Add + |
| Royalties                                                                                            | <input checked="" type="checkbox"/> | <input type="checkbox"/> | <input type="checkbox"/>        |        |          | Del × |
|                                                                                                      |                                     |                          |                                 |        |          | Add + |
| Payment for development of<br>educational presentations<br>including service on speakers'<br>bureaus | <input checked="" type="checkbox"/> | <input type="checkbox"/> | <input type="checkbox"/>        |        |          | Del × |
|                                                                                                      |                                     |                          |                                 |        |          | Add + |
| Stock/stock options                                                                                  | <input checked="" type="checkbox"/> | <input type="checkbox"/> | <input type="checkbox"/>        |        |          | Del × |
|                                                                                                      |                                     |                          |                                 |        |          | Add + |
| Travel/accommodations<br>expenses covered or<br>reimbursed                                           | <input checked="" type="checkbox"/> | <input type="checkbox"/> | <input type="checkbox"/>        |        |          | Del × |
|                                                                                                      |                                     |                          |                                 |        |          | Add + |
| Other (err on the side of full<br>disclosure)                                                        | <input checked="" type="checkbox"/> | <input type="checkbox"/> | <input type="checkbox"/>        |        |          | Del × |
|                                                                                                      |                                     |                          |                                 |        |          | Add + |

**Section 4. Information about financial relationships involving your spouse or partner or your children (under 18 years of age).**

Do your children or your spouse or partner have financial relationships with entities that have an interest in the content of the submitted work?

- No other relationships/conditions/circumstances that present potential conflict of interest
- Yes, the following relationships/conditions/circumstances are present (explain below):

## **ICMJE Uniform Disclosure Form for Potential Conflicts of Interest**

### **Section 5. Information about relevant nonfinancial associations.**

Do you have any relevant nonfinancial associations or interests (personal, professional, political, institutional, religious, or other) that a reasonable reader would want to know about in relation to the submitted work?

- No relevant nonfinancial relationships/conditions/circumstances to report.
- Yes, the following relevant nonfinancial relationships/conditions/circumstances are present (explain below):

At the time of manuscript acceptance, journals will ask authors to confirm and, if necessary, update their disclosure statements. On occasion, journals may ask authors to disclose further information about reported relationships.

Save Form

## ICMJE Uniform Disclosure Form for Potential Conflicts of Interest

### INSTRUCTIONS:

The purpose of this form is to provide readers of your manuscript with information about your other interests that could influence how they receive and understand your work. The form has five parts.

#### 1. Identifying information.

Each author should submit a separate form. Provide complete information and double-check the manuscript number. If you are NOT the corresponding author please insert his or her name.

#### 2. The work under consideration for publication.

Please provide information about the work that you have submitted for publication. The time frame for this reporting is that of the work itself, from the initial conception and planning to the present. The idea is to provide for the reader information about resources that you received, either directly or indirectly (via your institution), to enable you to complete the work. If you check the "No" box it means that you did the work without receiving any financial support from any third party -- that is, the work was supported by funds from the same institution that pays your salary and that institution did not receive third-party funds to pay you. If you or your institution did receive funds from a third party to support the work, check "Yes" along with the appropriate boxes to indicate the type of support and whether you or your institution received it.

#### 3. Relevant financial activities outside the submitted work.

Please report all sources of revenue relevant to the submitted work that accrued either directly to you or were paid to your institution on your behalf over the 36 months prior to submission of the work. This should include all monies from sources with relevance to the submitted work, not just monies from the entity that sponsored the research. If there is any question, it is usually better to disclose a relationship than not to do so. Please note that your interactions with the work's sponsor outside the submitted work should be listed here. For each category list each entity on a separate line. Use as many lines as necessary to provide complete information. In addition, please disclose relationships that fall outside the 36-month window that readers may want to know about and could reasonably criticize you for not disclosing (for example, long-term financial relationships that are now ended).

The goal of this section is to provide information for our reviewers and readers about your interactions with entities in the biomedical arena that could be perceived to influence, or that give the appearance of potentially influencing, what you wrote in the submitted work. You should disclose interactions with ANY entity that could be considered broadly relevant to the work. For example, if your article is about testing an epidermal growth factor receptor (EGFR) antagonist in lung cancer, you should report all associations with entities pursuing diagnostic or therapeutic strategies in cancer in general, not just in the area of EGFR or lung cancer. For grants you have received for work outside the submitted work, you should disclose support ONLY from entities that could be perceived to benefit financially from the published work, such as drug companies, or foundations supported by entities that could be perceived to have a financial stake in the outcome. Public funding sources, such as the NIH or the MRC, need not be disclosed. For example, if the NIH sponsored a piece of work you have been involved in but drugs were provided by a pharmaceutical company, you need only list the pharmaceutical company.

#### 4. Financial relationships involving your spouse or partner or your children (under 18 years of age).

If monies from the types of relationships listed in Section 3 were paid to your spouse or partner or dependent children, please list the type of activity and source of the money.

#### 5. Nonfinancial associations.

Please report any personal, professional, political, institutional, religious, or other associations that a reasonable reader would want to know about in relation to the submitted work.



## ICMJE Uniform Disclosure Form for Potential Conflicts of Interest

### Section 1. Identifying Information.

Given Name:  Surname:  Effective Date:

Format example: 07-August-2008

Are you the corresponding author?  Yes  No

Corresponding author's name:

Manuscript Title:

Manuscript Identifying Number (if you know it):

### Section 2. Information about the support of the work under consideration for publication.

Did you or your institution at any time receive payment or support in kind for any aspect of the submitted work (including but not limited to grants, data monitoring board, study design, manuscript preparation, statistical analysis, etc...)?

No

Yes, specify nature of compensation

If you have more than one relationship, click "Add +" to add a row. Click "Del x" to delete an extra row.

| Type                                                                                                                                 | Money Paid to You*                  |                                     | Money to Your Institution           |                                     | Name of Entity | Comments**                         |       |
|--------------------------------------------------------------------------------------------------------------------------------------|-------------------------------------|-------------------------------------|-------------------------------------|-------------------------------------|----------------|------------------------------------|-------|
|                                                                                                                                      | No                                  | Yes                                 | No                                  | Yes                                 |                |                                    |       |
| Grant                                                                                                                                | <input checked="" type="checkbox"/> | <input type="checkbox"/>            | <input type="checkbox"/>            | <input checked="" type="checkbox"/> | NIH            | Grant support for conduct of trial | Del x |
|                                                                                                                                      |                                     |                                     |                                     |                                     |                |                                    | Add + |
| Consulting fee or honorarium                                                                                                         | <input checked="" type="checkbox"/> | <input type="checkbox"/>            | <input checked="" type="checkbox"/> | <input type="checkbox"/>            |                |                                    | Del x |
|                                                                                                                                      |                                     |                                     |                                     |                                     |                |                                    | Add + |
| Support for travel to meetings for the study or otherwise                                                                            | <input type="checkbox"/>            | <input checked="" type="checkbox"/> | <input checked="" type="checkbox"/> | <input type="checkbox"/>            | NIH            |                                    | Del x |
|                                                                                                                                      |                                     |                                     |                                     |                                     |                |                                    | Add + |
| Fees for participation in review activities such as data monitoring boards, statistical analysis, end point committees, and the like | <input checked="" type="checkbox"/> | <input type="checkbox"/>            | <input checked="" type="checkbox"/> | <input type="checkbox"/>            |                |                                    | Del x |
|                                                                                                                                      |                                     |                                     |                                     |                                     |                |                                    | Add + |
| Payment for writing or reviewing the manuscript                                                                                      | <input checked="" type="checkbox"/> | <input type="checkbox"/>            | <input checked="" type="checkbox"/> | <input type="checkbox"/>            |                |                                    | Del x |



**ICMJE Uniform Disclosure Form for Potential Conflicts of Interest**

| Type                                                                                            | Money Paid to You*                  |                          | Money to Your Institution           |                                     | Name of Entity | Comments**                 |       |
|-------------------------------------------------------------------------------------------------|-------------------------------------|--------------------------|-------------------------------------|-------------------------------------|----------------|----------------------------|-------|
|                                                                                                 |                                     |                          |                                     |                                     |                |                            | Add + |
| Support in kind such as writing, provision of medicines or equipment, or administrative support | <input checked="" type="checkbox"/> | <input type="checkbox"/> | <input type="checkbox"/>            | <input checked="" type="checkbox"/> | NIH            | medicines for participants | Del × |
|                                                                                                 |                                     |                          |                                     |                                     |                |                            | Add + |
| Other                                                                                           | <input checked="" type="checkbox"/> | <input type="checkbox"/> | <input checked="" type="checkbox"/> | <input type="checkbox"/>            |                |                            | Del × |
|                                                                                                 |                                     |                          |                                     |                                     |                |                            | Add + |

\*\*Use this section to provide any needed explanation

**Section 3. Information about relevant financial relationships outside the submitted work.**

Place a check in the appropriate boxes in the table to indicate whether you have financial relationships (regardless of amount of compensation) with any entities that have an interest related to the submitted work. Use one line for each entity; add as many lines as you need. Use the comments column to indicate any additional information that you think a reader or editor would want to know about the compensation. Report relationships that were present during the 36 months prior to submission. In addition please disclose relationships that fall outside the 36-month window that readers may want to know about and could reasonably criticize you for not disclosing (for example, long-term financial relationships that are now ended).

If you have more than one relationship, click "Add +" to add a row. Click "Del ×" to delete an extra row.

| Type of Relationship (in alphabetical order) | No                                  | Money Paid to You                   | Money to Your institution           | Entity                     | Comments |       |       |
|----------------------------------------------|-------------------------------------|-------------------------------------|-------------------------------------|----------------------------|----------|-------|-------|
| Board membership                             | <input type="checkbox"/>            | <input checked="" type="checkbox"/> | <input type="checkbox"/>            | National Lipid Association |          | Del × |       |
|                                              |                                     |                                     |                                     |                            |          |       | Add + |
| Consultancy                                  | <input checked="" type="checkbox"/> | <input type="checkbox"/>            | <input type="checkbox"/>            |                            |          | Del × |       |
|                                              |                                     |                                     |                                     |                            |          |       | Add + |
| Employment                                   | <input checked="" type="checkbox"/> | <input type="checkbox"/>            | <input type="checkbox"/>            |                            |          | Del × |       |
|                                              |                                     |                                     |                                     |                            |          |       | Add + |
| Expert testimony                             | <input checked="" type="checkbox"/> | <input type="checkbox"/>            | <input type="checkbox"/>            |                            |          | Del × |       |
|                                              |                                     |                                     |                                     |                            |          |       | Add + |
| Gifts                                        | <input checked="" type="checkbox"/> | <input type="checkbox"/>            | <input type="checkbox"/>            |                            |          | Del × |       |
|                                              |                                     |                                     |                                     |                            |          |       | Add + |
| Grants/grants pending                        | <input type="checkbox"/>            | <input type="checkbox"/>            | <input checked="" type="checkbox"/> | Astra Zeneca               |          | Del × |       |



**ICMJE Uniform Disclosure Form for Potential Conflicts of Interest**

| Type of Relationship<br>(in alphabetical order)                                                      | No                                  | Money<br>Paid to<br>You             | Money to<br>Your<br>institution | Entity                     | Comments |       |
|------------------------------------------------------------------------------------------------------|-------------------------------------|-------------------------------------|---------------------------------|----------------------------|----------|-------|
|                                                                                                      |                                     |                                     |                                 |                            |          | Add + |
| Honoraria                                                                                            | <input type="checkbox"/>            | <input checked="" type="checkbox"/> | <input type="checkbox"/>        | Astra Zeneca               |          | Del × |
| Honoraria                                                                                            | <input type="checkbox"/>            | <input checked="" type="checkbox"/> | <input type="checkbox"/>        | Merck                      |          | Del × |
| Honoraria                                                                                            | <input type="checkbox"/>            | <input checked="" type="checkbox"/> | <input type="checkbox"/>        | Merck-schering Plough      |          | Del × |
|                                                                                                      |                                     |                                     |                                 |                            |          | Add + |
| Payment for manuscript<br>preparation                                                                | <input checked="" type="checkbox"/> | <input type="checkbox"/>            | <input type="checkbox"/>        |                            |          | Del × |
|                                                                                                      |                                     |                                     |                                 |                            |          | Add + |
| Patents (planned, pending or<br>issued)                                                              | <input checked="" type="checkbox"/> | <input type="checkbox"/>            | <input type="checkbox"/>        |                            |          | Del × |
|                                                                                                      |                                     |                                     |                                 |                            |          | Add + |
| Royalties                                                                                            | <input checked="" type="checkbox"/> | <input type="checkbox"/>            | <input type="checkbox"/>        |                            |          | Del × |
|                                                                                                      |                                     |                                     |                                 |                            |          | Add + |
| Payment for development of<br>educational presentations<br>including service on speakers'<br>bureaus | <input checked="" type="checkbox"/> | <input type="checkbox"/>            | <input type="checkbox"/>        |                            |          | Del × |
|                                                                                                      |                                     |                                     |                                 |                            |          | Add + |
| Stock/stock options                                                                                  | <input checked="" type="checkbox"/> | <input type="checkbox"/>            | <input type="checkbox"/>        |                            |          | Del × |
|                                                                                                      |                                     |                                     |                                 |                            |          | Add + |
| Travel/accommodations<br>expenses covered or<br>reimbursed                                           | <input type="checkbox"/>            | <input checked="" type="checkbox"/> | <input type="checkbox"/>        | Astra Zeneca               |          | Del × |
| Travel/accommodations<br>expenses covered or<br>reimbursed                                           | <input type="checkbox"/>            | <input checked="" type="checkbox"/> | <input type="checkbox"/>        | Merck                      |          | Del × |
| Travel/accommodations<br>expenses covered or<br>reimbursed                                           | <input type="checkbox"/>            | <input checked="" type="checkbox"/> | <input type="checkbox"/>        | Merck-Schering Plough      |          | Del × |
| Travel/accommodations<br>expenses covered or<br>reimbursed                                           | <input type="checkbox"/>            | <input checked="" type="checkbox"/> | <input type="checkbox"/>        | National Lipid Association |          | Del × |
|                                                                                                      |                                     |                                     |                                 |                            |          | Add + |
| Other (err on the side of full<br>disclosure)                                                        | <input checked="" type="checkbox"/> | <input type="checkbox"/>            | <input type="checkbox"/>        |                            |          | Del × |
|                                                                                                      |                                     |                                     |                                 |                            |          | Add + |

## **ICMJE Uniform Disclosure Form for Potential Conflicts of Interest**

### **Section 4. Information about financial relationships involving your spouse or partner or your children (under 18 years of age).**

Do your children or your spouse or partner have financial relationships with entities that have an interest in the content of the submitted work?

- No other relationships/conditions/circumstances that present potential conflict of interest
- Yes, the following relationships/conditions/circumstances are present (explain below):

### **Section 5. Information about relevant nonfinancial associations.**

Do you have any relevant nonfinancial associations or interests (personal, professional, political, institutional, religious, or other) that a reasonable reader would want to know about in relation to the submitted work?

- No relevant nonfinancial relationships/conditions/circumstances to report.
- Yes, the following relevant nonfinancial relationships/conditions/circumstances are present (explain below):

At the time of manuscript acceptance, journals will ask authors to confirm and, if necessary, update their disclosure statements. On occasion, journals may ask authors to disclose further information about reported relationships.

Save Form

## **ICMJE Uniform Disclosure Form for Potential Conflicts of Interest**

### **INSTRUCTIONS:**

The purpose of this form is to provide readers of your manuscript with information about your other interests that could influence how they receive and understand your work. The form has five parts.

#### **1. Identifying information.**

Each author should submit a separate form. Provide complete information and double-check the manuscript number. If you are NOT the corresponding author please insert his or her name.

#### **2. The work under consideration for publication.**

Please provide information about the work that you have submitted for publication. The time frame for this reporting is that of the work itself, from the initial conception and planning to the present. The idea is to provide for the reader information about resources that you received, either directly or indirectly (via your institution), to enable you to complete the work. If you check the "No" box it means that you did the work without receiving any financial support from any third party -- that is, the work was supported by funds from the same institution that pays your salary and that institution did not receive third-party funds to pay you. If you or your institution did receive funds from a third party to support the work, check "Yes" along with the appropriate boxes to indicate the type of support and whether you or your institution received it.

#### **3. Relevant financial activities outside the submitted work.**

Please report all sources of revenue relevant to the submitted work that accrued either directly to you or were paid to your institution on your behalf over the 36 months prior to submission of the work. This should include all monies from sources with relevance to the submitted work, not just monies from the entity that sponsored the research. If there is any question, it is usually better to disclose a relationship than not to do so. Please note that your interactions with the work's sponsor outside the submitted work should be listed here. For each category list each entity on a separate line. Use as many lines as necessary to provide complete information. In addition, please disclose relationships that fall outside the 36-month window that readers may want to know about and could reasonably criticize you for not disclosing (for example, long-term financial relationships that are now ended).

The goal of this section is to provide information for our reviewers and readers about your interactions with entities in the biomedical arena that could be perceived to influence, or that give the appearance of potentially influencing, what you wrote in the submitted work. You should disclose interactions with ANY entity that could be considered broadly relevant to the work. For example, if your article is about testing an epidermal growth factor receptor (EGFR) antagonist in lung cancer, you should report all associations with entities pursuing diagnostic or therapeutic strategies in cancer in general, not just in the area of EGFR or lung cancer. For grants you have received for work outside the submitted work, you should disclose support ONLY from entities that could be perceived to benefit financially from the published work, such as drug companies, or foundations supported by entities that could be perceived to have a financial stake in the outcome. Public funding sources, such as the NIH or the MRC, need not be disclosed. For example, if the NIH sponsored a piece of work you have been involved in but drugs were provided by a pharmaceutical company, you need only list the pharmaceutical company.

#### **4. Financial relationships involving your spouse or partner or your children (under 18 years of age).**

If monies from the types of relationships listed in Section 3 were paid to your spouse or partner or dependent children, please list the type of activity and source of the money.

#### **5. Nonfinancial associations.**

Please report any personal, professional, political, institutional, religious, or other associations that a reasonable reader would want to know about in relation to the submitted work.



## ICMJE Uniform Disclosure Form for Potential Conflicts of Interest

### Section 1. Identifying Information.

Given Name:  Surname:  Effective Date:

(or first)

(or last)

Format example: 07-August-2008

Are you the corresponding author?  Yes  No

Corresponding author's name:

Manuscript Title:

Manuscript Identifying Number (if you know it):

### Section 2. Information about the support of the work under consideration for publication.

Did you or your institution at any time receive payment or support in kind for any aspect of the submitted work (including but not limited to grants, data monitoring board, study design, manuscript preparation, statistical analysis, etc...)?

No

Yes, specify nature of compensation

If you have more than one relationship, click "Add +" to add a row. Click "Del x" to delete an extra row.

| Type                                                                                                                                 | Money Paid to You*                  |                          | Money to Your Institution           |                                     | Name of Entity                            | Comments**                                       |       |
|--------------------------------------------------------------------------------------------------------------------------------------|-------------------------------------|--------------------------|-------------------------------------|-------------------------------------|-------------------------------------------|--------------------------------------------------|-------|
|                                                                                                                                      | No                                  | Yes                      | No                                  | Yes                                 |                                           |                                                  |       |
| Grant                                                                                                                                | <input checked="" type="checkbox"/> | <input type="checkbox"/> | <input type="checkbox"/>            | <input checked="" type="checkbox"/> | National Heart, Lung, and Blood Institute | For management of ACCORD Clinical Center Network | Del x |
|                                                                                                                                      |                                     |                          |                                     |                                     |                                           |                                                  | Add + |
| Consulting fee or honorarium                                                                                                         | <input checked="" type="checkbox"/> | <input type="checkbox"/> | <input checked="" type="checkbox"/> | <input type="checkbox"/>            |                                           |                                                  | Del x |
|                                                                                                                                      |                                     |                          |                                     |                                     |                                           |                                                  | Add + |
| Support for travel to meetings for the study or otherwise                                                                            | <input checked="" type="checkbox"/> | <input type="checkbox"/> | <input checked="" type="checkbox"/> | <input type="checkbox"/>            |                                           |                                                  | Del x |
|                                                                                                                                      |                                     |                          |                                     |                                     |                                           |                                                  | Add + |
| Fees for participation in review activities such as data monitoring boards, statistical analysis, end point committees, and the like | <input checked="" type="checkbox"/> | <input type="checkbox"/> | <input checked="" type="checkbox"/> | <input type="checkbox"/>            |                                           |                                                  | Del x |
|                                                                                                                                      |                                     |                          |                                     |                                     |                                           |                                                  | Add + |

## ICMJE Uniform Disclosure Form for Potential Conflicts of Interest

| Type                                                                                            | Money Paid to You*                  |                          | Money to Your Institution           |                          | Name of Entity | Comments** |       |
|-------------------------------------------------------------------------------------------------|-------------------------------------|--------------------------|-------------------------------------|--------------------------|----------------|------------|-------|
| Payment for writing or reviewing the manuscript                                                 | <input checked="" type="checkbox"/> | <input type="checkbox"/> | <input checked="" type="checkbox"/> | <input type="checkbox"/> |                |            | Del × |
|                                                                                                 |                                     |                          |                                     |                          |                |            | Add + |
| Support in kind such as writing, provision of medicines or equipment, or administrative support | <input checked="" type="checkbox"/> | <input type="checkbox"/> | <input checked="" type="checkbox"/> | <input type="checkbox"/> |                |            | Del × |
|                                                                                                 |                                     |                          |                                     |                          |                |            | Add + |
| Other                                                                                           | <input checked="" type="checkbox"/> | <input type="checkbox"/> | <input checked="" type="checkbox"/> | <input type="checkbox"/> |                |            | Del × |
|                                                                                                 |                                     |                          |                                     |                          |                |            | Add + |

\*\*Use this section to provide any needed explanation

### Section 3. Information about relevant financial relationships outside the submitted work.

Place a check in the appropriate boxes in the table to indicate whether you have financial relationships (regardless of amount of compensation) with any entities that have an interest related to the submitted work. Use one line for each entity; add as many lines as you need. Use the comments column to indicate any additional information that you think a reader or editor would want to know about the compensation. Report relationships that were present during the 36 months prior to submission. In addition please disclose relationships that fall outside the 36-month window that readers may want to know about and could reasonably criticize you for not disclosing (for example, long-term financial relationships that are now ended).

If you have more than one relationship, click "Add +" to add a row. Click "Del ×" to delete an extra row.

| Type of Relationship (in alphabetical order) | No                                  | Money Paid to You                   | Money to Your institution | Entity               | Comments                                                                      |       |
|----------------------------------------------|-------------------------------------|-------------------------------------|---------------------------|----------------------|-------------------------------------------------------------------------------|-------|
| Board membership                             | <input checked="" type="checkbox"/> | <input type="checkbox"/>            | <input type="checkbox"/>  |                      |                                                                               | Del × |
|                                              |                                     |                                     |                           |                      |                                                                               | Add + |
| Consultancy                                  | <input type="checkbox"/>            | <input checked="" type="checkbox"/> | <input type="checkbox"/>  | Novartis             | clinical trial DSMB, clinical trials steering committees, consultant meetings | Del × |
| Consultancy                                  | <input type="checkbox"/>            | <input checked="" type="checkbox"/> | <input type="checkbox"/>  | Takeda               | clinical trial DSMB, consulting                                               | Del × |
| Consultancy                                  | <input type="checkbox"/>            | <input checked="" type="checkbox"/> | <input type="checkbox"/>  | sanofi-aventis       | consulting                                                                    | Del × |
| Consultancy                                  | <input type="checkbox"/>            | <input checked="" type="checkbox"/> | <input type="checkbox"/>  | Bristol-Myers Squibb | consulting                                                                    | Del × |
| Consultancy                                  | <input type="checkbox"/>            | <input checked="" type="checkbox"/> | <input type="checkbox"/>  | King Pharmaceuticals | consulting                                                                    | Del × |
| Consultancy                                  | <input type="checkbox"/>            | <input checked="" type="checkbox"/> | <input type="checkbox"/>  | Daiichi-Sankyo       | consulting                                                                    | Del × |
| Consultancy                                  | <input type="checkbox"/>            | <input checked="" type="checkbox"/> | <input type="checkbox"/>  | Gilead               | DSMB                                                                          | Del × |



**ICMJE Uniform Disclosure Form for Potential Conflicts of Interest**

| Type of Relationship<br>(in alphabetical order)                                             | No                                  | Money<br>Paid to<br>You             | Money to<br>Your<br>institution     | Entity       | Comments                            |       |
|---------------------------------------------------------------------------------------------|-------------------------------------|-------------------------------------|-------------------------------------|--------------|-------------------------------------|-------|
| Consultancy                                                                                 | <input type="checkbox"/>            | <input checked="" type="checkbox"/> | <input type="checkbox"/>            | Theravance   | consulting                          | Del × |
| Consultancy                                                                                 | <input type="checkbox"/>            | <input checked="" type="checkbox"/> | <input type="checkbox"/>            | Pharmacopeia | consulting                          | Del × |
| Consultancy                                                                                 | <input type="checkbox"/>            | <input checked="" type="checkbox"/> | <input type="checkbox"/>            | Sciele       | consulting                          | Del × |
|                                                                                             |                                     |                                     |                                     |              |                                     | Add + |
| Employment                                                                                  | <input checked="" type="checkbox"/> | <input type="checkbox"/>            | <input type="checkbox"/>            |              |                                     | Del × |
|                                                                                             |                                     |                                     |                                     |              |                                     | Add + |
| Expert testimony                                                                            | <input checked="" type="checkbox"/> | <input type="checkbox"/>            | <input type="checkbox"/>            |              |                                     | Del × |
|                                                                                             |                                     |                                     |                                     |              |                                     | Add + |
| Gifts                                                                                       | <input checked="" type="checkbox"/> | <input type="checkbox"/>            | <input type="checkbox"/>            |              |                                     | Del × |
|                                                                                             |                                     |                                     |                                     |              |                                     | Add + |
| Grants/grants pending                                                                       | <input type="checkbox"/>            | <input type="checkbox"/>            | <input checked="" type="checkbox"/> | Novartis     | two clinical trials in hypertension | Del × |
| Grants/grants pending                                                                       | <input type="checkbox"/>            | <input type="checkbox"/>            | <input checked="" type="checkbox"/> | GSK          | clinical trial in diabetes          | Del × |
| Grants/grants pending                                                                       | <input type="checkbox"/>            | <input type="checkbox"/>            | <input checked="" type="checkbox"/> | Merck        | clinical trial in diabetes          | Del × |
|                                                                                             |                                     |                                     |                                     |              |                                     | Add + |
| Honoraria                                                                                   | <input checked="" type="checkbox"/> | <input type="checkbox"/>            | <input type="checkbox"/>            |              |                                     | Del × |
|                                                                                             |                                     |                                     |                                     |              |                                     | Add + |
| Payment for manuscript preparation                                                          | <input checked="" type="checkbox"/> | <input type="checkbox"/>            | <input type="checkbox"/>            |              |                                     | Del × |
|                                                                                             |                                     |                                     |                                     |              |                                     | Add + |
| Patents (planned, pending or issued)                                                        | <input checked="" type="checkbox"/> | <input type="checkbox"/>            | <input type="checkbox"/>            |              |                                     | Del × |
|                                                                                             |                                     |                                     |                                     |              |                                     | Add + |
| Royalties                                                                                   | <input checked="" type="checkbox"/> | <input type="checkbox"/>            | <input type="checkbox"/>            |              |                                     | Del × |
|                                                                                             |                                     |                                     |                                     |              |                                     | Add + |
| Payment for development of educational presentations including service on speakers' bureaus | <input checked="" type="checkbox"/> | <input type="checkbox"/>            | <input type="checkbox"/>            |              |                                     | Del × |
|                                                                                             |                                     |                                     |                                     |              |                                     | Add + |
| Stock/stock options                                                                         | <input checked="" type="checkbox"/> | <input type="checkbox"/>            | <input type="checkbox"/>            |              |                                     | Del × |
|                                                                                             |                                     |                                     |                                     |              |                                     | Add + |

## ICMJE Uniform Disclosure Form for Potential Conflicts of Interest

| Type of Relationship<br>(in alphabetical order)            | No                                  | Money<br>Paid to<br>You  | Money to<br>Your<br>institution | Entity | Comments |       |
|------------------------------------------------------------|-------------------------------------|--------------------------|---------------------------------|--------|----------|-------|
| Travel/accommodations<br>expenses covered or<br>reimbursed | <input checked="" type="checkbox"/> | <input type="checkbox"/> | <input type="checkbox"/>        |        |          | Del × |
|                                                            |                                     |                          |                                 |        |          | Add + |
| Other (err on the side of full<br>disclosure)              | <input checked="" type="checkbox"/> | <input type="checkbox"/> | <input type="checkbox"/>        |        |          | Del × |
|                                                            |                                     |                          |                                 |        |          | Add + |

### Section 4. Information about financial relationships involving your spouse or partner or your children (under 18 years of age).

Do your children or your spouse or partner have financial relationships with entities that have an interest in the content of the submitted work?

- No other relationships/conditions/circumstances that present potential conflict of interest
- Yes, the following relationships/conditions/circumstances are present (explain below):

### Section 5. Information about relevant nonfinancial associations.

Do you have any relevant nonfinancial associations or interests (personal, professional, political, institutional, religious, or other) that a reasonable reader would want to know about in relation to the submitted work?

- No relevant nonfinancial relationships/conditions/circumstances to report.
- Yes, the following relevant nonfinancial relationships/conditions/circumstances are present (explain below):

At the time of manuscript acceptance, journals will ask authors to confirm and, if necessary, update their disclosure statements. On occasion, journals may ask authors to disclose further information about reported relationships.

Save Form

## **ICMJE Uniform Disclosure Form for Potential Conflicts of Interest**

### **INSTRUCTIONS:**

The purpose of this form is to provide readers of your manuscript with information about your other interests that could influence how they receive and understand your work. The form has five parts.

#### **1. Identifying information.**

Each author should submit a separate form. Provide complete information and double-check the manuscript number. If you are NOT the corresponding author please insert his or her name.

#### **2. The work under consideration for publication.**

Please provide information about the work that you have submitted for publication. The time frame for this reporting is that of the work itself, from the initial conception and planning to the present. The idea is to provide for the reader information about resources that you received, either directly or indirectly (via your institution), to enable you to complete the work. If you check the "No" box it means that you did the work without receiving any financial support from any third party -- that is, the work was supported by funds from the same institution that pays your salary and that institution did not receive third-party funds to pay you. If you or your institution did receive funds from a third party to support the work, check "Yes" along with the appropriate boxes to indicate the type of support and whether you or your institution received it.

#### **3. Relevant financial activities outside the submitted work.**

Please report all sources of revenue relevant to the submitted work that accrued either directly to you or were paid to your institution on your behalf over the 36 months prior to submission of the work. This should include all monies from sources with relevance to the submitted work, not just monies from the entity that sponsored the research. If there is any question, it is usually better to disclose a relationship than not to do so. Please note that your interactions with the work's sponsor outside the submitted work should be listed here. For each category list each entity on a separate line. Use as many lines as necessary to provide complete information. In addition, please disclose relationships that fall outside the 36-month window that readers may want to know about and could reasonably criticize you for not disclosing (for example, long-term financial relationships that are now ended).

The goal of this section is to provide information for our reviewers and readers about your interactions with entities in the biomedical arena that could be perceived to influence, or that give the appearance of potentially influencing, what you wrote in the submitted work. You should disclose interactions with ANY entity that could be considered broadly relevant to the work. For example, if your article is about testing an epidermal growth factor receptor (EGFR) antagonist in lung cancer, you should report all associations with entities pursuing diagnostic or therapeutic strategies in cancer in general, not just in the area of EGFR or lung cancer. For grants you have received for work outside the submitted work, you should disclose support ONLY from entities that could be perceived to benefit financially from the published work, such as drug companies, or foundations supported by entities that could be perceived to have a financial stake in the outcome. Public funding sources, such as the NIH or the MRC, need not be disclosed. For example, if the NIH sponsored a piece of work you have been involved in but drugs were provided by a pharmaceutical company, you need only list the pharmaceutical company.

#### **4. Financial relationships involving your spouse or partner or your children (under 18 years of age).**

If monies from the types of relationships listed in Section 3 were paid to your spouse or partner or dependent children, please list the type of activity and source of the money.

#### **5. Nonfinancial associations.**

Please report any personal, professional, political, institutional, religious, or other associations that a reasonable reader would want to know about in relation to the submitted work.



## ICMJE Uniform Disclosure Form for Potential Conflicts of Interest

### Section 1. Identifying Information.

Given Name:  Surname:  Effective Date:

Format example: 07-August-2008

Are you the corresponding author?  Yes  No

Corresponding author's name:

Manuscript Title:

Manuscript Identifying Number (if you know it):

### Section 2. Information about the support of the work under consideration for publication.

Did you or your institution at any time receive payment or support in kind for any aspect of the submitted work (including but not limited to grants, data monitoring board, study design, manuscript preparation, statistical analysis, etc...)?

No

Yes, specify nature of compensation

### Section 3. Information about relevant financial relationships outside the submitted work.

Place a check in the appropriate boxes in the table to indicate whether you have financial relationships (regardless of amount of compensation) with any entities that have an interest related to the submitted work. Use one line for each entity; add as many lines as you need. Use the comments column to indicate any additional information that you think a reader or editor would want to know about the compensation. Report relationships that were present during the 36 months prior to submission. In addition please disclose relationships that fall outside the 36-month window that readers may want to know about and could reasonably criticize you for not disclosing (for example, long-term financial relationships that are now ended).

If you have more than one relationship, click "Add +" to add a row. Click "Del x" to delete an extra row.

| Type of Relationship (in alphabetical order) | No                                  | Money Paid to You        | Money to Your institution | Entity | Comments |       |
|----------------------------------------------|-------------------------------------|--------------------------|---------------------------|--------|----------|-------|
| Board membership                             | <input checked="" type="checkbox"/> | <input type="checkbox"/> | <input type="checkbox"/>  |        |          | Del x |
|                                              |                                     |                          |                           |        |          | Add + |
| Consultancy                                  | <input checked="" type="checkbox"/> | <input type="checkbox"/> | <input type="checkbox"/>  |        |          | Del x |
|                                              |                                     |                          |                           |        |          | Add + |
| Employment                                   | <input checked="" type="checkbox"/> | <input type="checkbox"/> | <input type="checkbox"/>  |        |          | Del x |
|                                              |                                     |                          |                           |        |          | Add + |



**ICMJE Uniform Disclosure Form for Potential Conflicts of Interest**

| Type of Relationship<br>(in alphabetical order)                                                      | No                                  | Money<br>Paid to<br>You             | Money to<br>Your<br>institution | Entity                 | Comments        |       |
|------------------------------------------------------------------------------------------------------|-------------------------------------|-------------------------------------|---------------------------------|------------------------|-----------------|-------|
| Expert testimony                                                                                     | <input checked="" type="checkbox"/> | <input type="checkbox"/>            | <input type="checkbox"/>        |                        |                 | Del × |
|                                                                                                      |                                     |                                     |                                 |                        |                 | Add + |
| Gifts                                                                                                | <input checked="" type="checkbox"/> | <input type="checkbox"/>            | <input type="checkbox"/>        |                        |                 | Del × |
|                                                                                                      |                                     |                                     |                                 |                        |                 | Add + |
| Grants/grants pending                                                                                | <input checked="" type="checkbox"/> | <input type="checkbox"/>            | <input type="checkbox"/>        |                        |                 | Del × |
|                                                                                                      |                                     |                                     |                                 |                        |                 | Add + |
| Honoraria                                                                                            | <input checked="" type="checkbox"/> | <input type="checkbox"/>            | <input type="checkbox"/>        |                        |                 | Del × |
|                                                                                                      |                                     |                                     |                                 |                        |                 | Add + |
| Payment for manuscript<br>preparation                                                                | <input checked="" type="checkbox"/> | <input type="checkbox"/>            | <input type="checkbox"/>        |                        |                 | Del × |
|                                                                                                      |                                     |                                     |                                 |                        |                 | Add + |
| Patents (planned, pending or<br>issued)                                                              | <input checked="" type="checkbox"/> | <input type="checkbox"/>            | <input type="checkbox"/>        |                        |                 | Del × |
|                                                                                                      |                                     |                                     |                                 |                        |                 | Add + |
| Royalties                                                                                            | <input checked="" type="checkbox"/> | <input type="checkbox"/>            | <input type="checkbox"/>        |                        |                 | Del × |
|                                                                                                      |                                     |                                     |                                 |                        |                 | Add + |
| Payment for development of<br>educational presentations<br>including service on speakers'<br>bureaus | <input type="checkbox"/>            | <input checked="" type="checkbox"/> | <input type="checkbox"/>        | Pfizer                 | CME Development | Del × |
| Payment for development of<br>educational presentations<br>including service on speakers'<br>bureaus | <input type="checkbox"/>            | <input checked="" type="checkbox"/> | <input type="checkbox"/>        | Abbott Pharmaceuticals | Speakers Bureau | Del × |
| Payment for development of<br>educational presentations<br>including service on speakers'<br>bureaus | <input type="checkbox"/>            | <input checked="" type="checkbox"/> | <input type="checkbox"/>        | Merck-Schering Plough  | Speakers Bureau | Del × |
|                                                                                                      |                                     |                                     |                                 |                        |                 | Add + |
| Stock/stock options                                                                                  | <input checked="" type="checkbox"/> | <input type="checkbox"/>            | <input type="checkbox"/>        |                        |                 | Del × |
|                                                                                                      |                                     |                                     |                                 |                        |                 | Add + |
| Travel/accommodations<br>expenses covered or<br>reimbursed                                           | <input checked="" type="checkbox"/> | <input type="checkbox"/>            | <input type="checkbox"/>        |                        |                 | Del × |
|                                                                                                      |                                     |                                     |                                 |                        |                 | Add + |

## ICMJE Uniform Disclosure Form for Potential Conflicts of Interest

| Type of Relationship<br>(in alphabetical order) | No                                  | Money<br>Paid to<br>You  | Money to<br>Your<br>institution | Entity | Comments |       |
|-------------------------------------------------|-------------------------------------|--------------------------|---------------------------------|--------|----------|-------|
| Other (err on the side of full disclosure)      | <input checked="" type="checkbox"/> | <input type="checkbox"/> | <input type="checkbox"/>        |        |          | Del × |
|                                                 |                                     |                          |                                 |        |          | Add + |

### Section 4. Information about financial relationships involving your spouse or partner or your children (under 18 years of age).

Do your children or your spouse or partner have financial relationships with entities that have an interest in the content of the submitted work?

- No other relationships/conditions/circumstances that present potential conflict of interest
- Yes, the following relationships/conditions/circumstances are present (explain below):

### Section 5. Information about relevant nonfinancial associations.

Do you have any relevant nonfinancial associations or interests (personal, professional, political, institutional, religious, or other) that a reasonable reader would want to know about in relation to the submitted work?

- No relevant nonfinancial relationships/conditions/circumstances to report.
- Yes, the following relevant nonfinancial relationships/conditions/circumstances are present (explain below):

At the time of manuscript acceptance, journals will ask authors to confirm and, if necessary, update their disclosure statements. On occasion, journals may ask authors to disclose further information about reported relationships.

Save Form

## ICMJE Uniform Disclosure Form for Potential Conflicts of Interest

### INSTRUCTIONS:

The purpose of this form is to provide readers of your manuscript with information about your other interests that could influence how they receive and understand your work. The form has five parts.

#### 1. Identifying information.

Each author should submit a separate form. Provide complete information and double-check the manuscript number. If you are NOT the corresponding author please insert his or her name.

#### 2. The work under consideration for publication.

Please provide information about the work that you have submitted for publication. The time frame for this reporting is that of the work itself, from the initial conception and planning to the present. The idea is to provide for the reader information about resources that you received, either directly or indirectly (via your institution), to enable you to complete the work. If you check the "No" box it means that you did the work without receiving any financial support from any third party -- that is, the work was supported by funds from the same institution that pays your salary and that institution did not receive third-party funds to pay you. If you or your institution did receive funds from a third party to support the work, check "Yes" along with the appropriate boxes to indicate the type of support and whether you or your institution received it.

#### 3. Relevant financial activities outside the submitted work.

Please report all sources of revenue relevant to the submitted work that accrued either directly to you or were paid to your institution on your behalf over the 36 months prior to submission of the work. This should include all monies from sources with relevance to the submitted work, not just monies from the entity that sponsored the research. If there is any question, it is usually better to disclose a relationship than not to do so. Please note that your interactions with the work's sponsor outside the submitted work should be listed here. For each category list each entity on a separate line. Use as many lines as necessary to provide complete information. In addition, please disclose relationships that fall outside the 36-month window that readers may want to know about and could reasonably criticize you for not disclosing (for example, long-term financial relationships that are now ended).

The goal of this section is to provide information for our reviewers and readers about your interactions with entities in the biomedical arena that could be perceived to influence, or that give the appearance of potentially influencing, what you wrote in the submitted work. You should disclose interactions with ANY entity that could be considered broadly relevant to the work. For example, if your article is about testing an epidermal growth factor receptor (EGFR) antagonist in lung cancer, you should report all associations with entities pursuing diagnostic or therapeutic strategies in cancer in general, not just in the area of EGFR or lung cancer. For grants you have received for work outside the submitted work, you should disclose support ONLY from entities that could be perceived to benefit financially from the published work, such as drug companies, or foundations supported by entities that could be perceived to have a financial stake in the outcome. Public funding sources, such as the NIH or the MRC, need not be disclosed. For example, if the NIH sponsored a piece of work you have been involved in but drugs were provided by a pharmaceutical company, you need only list the pharmaceutical company.

#### 4. Financial relationships involving your spouse or partner or your children (under 18 years of age).

If monies from the types of relationships listed in Section 3 were paid to your spouse or partner or dependent children, please list the type of activity and source of the money.

#### 5. Nonfinancial associations.

Please report any personal, professional, political, institutional, religious, or other associations that a reasonable reader would want to know about in relation to the submitted work.



## ICMJE Uniform Disclosure Form for Potential Conflicts of Interest

### Section 1. Identifying Information.

Given Name:  Surname:  Effective Date:

Format example: 07-August-2008

Are you the corresponding author?  Yes  No

Corresponding author's name:

Manuscript Title:

Manuscript Identifying Number (if you know it):

### Section 2. Information about the support of the work under consideration for publication.

Did you or your institution at any time receive payment or support in kind for any aspect of the submitted work (including but not limited to grants, data monitoring board, study design, manuscript preparation, statistical analysis, etc...)?

No

Yes, specify nature of compensation

If you have more than one relationship, click "Add +" to add a row. Click "Del x" to delete an extra row.

| Type                                                                                                                                 | Money Paid to You*                  |                          | Money to Your Institution           |                                     | Name of Entity | Comments** |       |
|--------------------------------------------------------------------------------------------------------------------------------------|-------------------------------------|--------------------------|-------------------------------------|-------------------------------------|----------------|------------|-------|
|                                                                                                                                      | No                                  | Yes                      | No                                  | Yes                                 |                |            |       |
| Grant                                                                                                                                | <input checked="" type="checkbox"/> | <input type="checkbox"/> | <input type="checkbox"/>            | <input checked="" type="checkbox"/> | NIH/NHLBI      |            | Del x |
|                                                                                                                                      |                                     |                          |                                     |                                     |                |            | Add + |
| Consulting fee or honorarium                                                                                                         | <input checked="" type="checkbox"/> | <input type="checkbox"/> | <input checked="" type="checkbox"/> | <input type="checkbox"/>            |                |            | Del x |
|                                                                                                                                      |                                     |                          |                                     |                                     |                |            | Add + |
| Support for travel to meetings for the study or otherwise                                                                            | <input checked="" type="checkbox"/> | <input type="checkbox"/> | <input checked="" type="checkbox"/> | <input type="checkbox"/>            |                |            | Del x |
|                                                                                                                                      |                                     |                          |                                     |                                     |                |            | Add + |
| Fees for participation in review activities such as data monitoring boards, statistical analysis, end point committees, and the like | <input checked="" type="checkbox"/> | <input type="checkbox"/> | <input checked="" type="checkbox"/> | <input type="checkbox"/>            |                |            | Del x |
|                                                                                                                                      |                                     |                          |                                     |                                     |                |            | Add + |
| Payment for writing or reviewing the manuscript                                                                                      | <input checked="" type="checkbox"/> | <input type="checkbox"/> | <input checked="" type="checkbox"/> | <input type="checkbox"/>            |                |            | Del x |



**ICMJE Uniform Disclosure Form for Potential Conflicts of Interest**

| Type                                                                                            | Money Paid to You*                  |                          | Money to Your Institution           |                          | Name of Entity | Comments** |       |
|-------------------------------------------------------------------------------------------------|-------------------------------------|--------------------------|-------------------------------------|--------------------------|----------------|------------|-------|
|                                                                                                 |                                     |                          |                                     |                          |                |            | Add + |
| Support in kind such as writing, provision of medicines or equipment, or administrative support | <input checked="" type="checkbox"/> | <input type="checkbox"/> | <input checked="" type="checkbox"/> | <input type="checkbox"/> |                |            | Del × |
|                                                                                                 |                                     |                          |                                     |                          |                |            | Add + |
| Other                                                                                           | <input checked="" type="checkbox"/> | <input type="checkbox"/> | <input checked="" type="checkbox"/> | <input type="checkbox"/> |                |            | Del × |
|                                                                                                 |                                     |                          |                                     |                          |                |            | Add + |

\*\*Use this section to provide any needed explanation

**Section 3. Information about relevant financial relationships outside the submitted work.**

Place a check in the appropriate boxes in the table to indicate whether you have financial relationships (regardless of amount of compensation) with any entities that have an interest related to the submitted work. Use one line for each entity; add as many lines as you need. Use the comments column to indicate any additional information that you think a reader or editor would want to know about the compensation. Report relationships that were present during the 36 months prior to submission. In addition please disclose relationships that fall outside the 36-month window that readers may want to know about and could reasonably criticize you for not disclosing (for example, long-term financial relationships that are now ended).

If you have more than one relationship, click "Add +" to add a row. Click "Del ×" to delete an extra row.

| Type of Relationship (in alphabetical order) | No                                  | Money Paid to You        | Money to Your institution | Entity | Comments |       |
|----------------------------------------------|-------------------------------------|--------------------------|---------------------------|--------|----------|-------|
| Board membership                             | <input checked="" type="checkbox"/> | <input type="checkbox"/> | <input type="checkbox"/>  |        |          | Del × |
|                                              |                                     |                          |                           |        |          | Add + |
| Consultancy                                  | <input checked="" type="checkbox"/> | <input type="checkbox"/> | <input type="checkbox"/>  |        |          | Del × |
|                                              |                                     |                          |                           |        |          | Add + |
| Employment                                   | <input checked="" type="checkbox"/> | <input type="checkbox"/> | <input type="checkbox"/>  |        |          | Del × |
|                                              |                                     |                          |                           |        |          | Add + |
| Expert testimony                             | <input checked="" type="checkbox"/> | <input type="checkbox"/> | <input type="checkbox"/>  |        |          | Del × |
|                                              |                                     |                          |                           |        |          | Add + |
| Gifts                                        | <input checked="" type="checkbox"/> | <input type="checkbox"/> | <input type="checkbox"/>  |        |          | Del × |
|                                              |                                     |                          |                           |        |          | Add + |
| Grants/grants pending                        | <input checked="" type="checkbox"/> | <input type="checkbox"/> | <input type="checkbox"/>  |        |          | Del × |



**ICMJE Uniform Disclosure Form for Potential Conflicts of Interest**

| Type of Relationship<br>(in alphabetical order)                                                      | No                                  | Money<br>Paid to<br>You  | Money to<br>Your<br>institution | Entity | Comments |       |
|------------------------------------------------------------------------------------------------------|-------------------------------------|--------------------------|---------------------------------|--------|----------|-------|
|                                                                                                      |                                     |                          |                                 |        |          | Add + |
| Honoraria                                                                                            | <input checked="" type="checkbox"/> | <input type="checkbox"/> | <input type="checkbox"/>        |        |          | Del × |
|                                                                                                      |                                     |                          |                                 |        |          | Add + |
| Payment for manuscript<br>preparation                                                                | <input checked="" type="checkbox"/> | <input type="checkbox"/> | <input type="checkbox"/>        |        |          | Del × |
|                                                                                                      |                                     |                          |                                 |        |          | Add + |
| Patents (planned, pending or<br>issued)                                                              | <input checked="" type="checkbox"/> | <input type="checkbox"/> | <input type="checkbox"/>        |        |          | Del × |
|                                                                                                      |                                     |                          |                                 |        |          | Add + |
| Royalties                                                                                            | <input checked="" type="checkbox"/> | <input type="checkbox"/> | <input type="checkbox"/>        |        |          | Del × |
|                                                                                                      |                                     |                          |                                 |        |          | Add + |
| Payment for development of<br>educational presentations<br>including service on speakers'<br>bureaus | <input checked="" type="checkbox"/> | <input type="checkbox"/> | <input type="checkbox"/>        |        |          | Del × |
|                                                                                                      |                                     |                          |                                 |        |          | Add + |
| Stock/stock options                                                                                  | <input checked="" type="checkbox"/> | <input type="checkbox"/> | <input type="checkbox"/>        |        |          | Del × |
|                                                                                                      |                                     |                          |                                 |        |          | Add + |
| Travel/accommodations<br>expenses covered or<br>reimbursed                                           | <input checked="" type="checkbox"/> | <input type="checkbox"/> | <input type="checkbox"/>        |        |          | Del × |
|                                                                                                      |                                     |                          |                                 |        |          | Add + |
| Other (err on the side of full<br>disclosure)                                                        | <input checked="" type="checkbox"/> | <input type="checkbox"/> | <input type="checkbox"/>        |        |          | Del × |
|                                                                                                      |                                     |                          |                                 |        |          | Add + |

**Section 4. Information about financial relationships involving your spouse or partner or your children (under 18 years of age).**

Do your children or your spouse or partner have financial relationships with entities that have an interest in the content of the submitted work?

- No other relationships/conditions/circumstances that present potential conflict of interest
- Yes, the following relationships/conditions/circumstances are present (explain below):

## **ICMJE Uniform Disclosure Form for Potential Conflicts of Interest**

### **Section 5. Information about relevant nonfinancial associations.**

Do you have any relevant nonfinancial associations or interests (personal, professional, political, institutional, religious, or other) that a reasonable reader would want to know about in relation to the submitted work?

- No relevant nonfinancial relationships/conditions/circumstances to report.
- Yes, the following relevant nonfinancial relationships/conditions/circumstances are present (explain below):

At the time of manuscript acceptance, journals will ask authors to confirm and, if necessary, update their disclosure statements. On occasion, journals may ask authors to disclose further information about reported relationships.

Save Form

## ICMJE Uniform Disclosure Form for Potential Conflicts of Interest

### INSTRUCTIONS:

The purpose of this form is to provide readers of your manuscript with information about your other interests that could influence how they receive and understand your work. The form has five parts.

#### 1. Identifying information.

Each author should submit a separate form. Provide complete information and double-check the manuscript number. If you are NOT the corresponding author please insert his or her name.

#### 2. The work under consideration for publication.

Please provide information about the work that you have submitted for publication. The time frame for this reporting is that of the work itself, from the initial conception and planning to the present. The idea is to provide for the reader information about resources that you received, either directly or indirectly (via your institution), to enable you to complete the work. If you check the "No" box it means that you did the work without receiving any financial support from any third party -- that is, the work was supported by funds from the same institution that pays your salary and that institution did not receive third-party funds to pay you. If you or your institution did receive funds from a third party to support the work, check "Yes" along with the appropriate boxes to indicate the type of support and whether you or your institution received it.

#### 3. Relevant financial activities outside the submitted work.

Please report all sources of revenue relevant to the submitted work that accrued either directly to you or were paid to your institution on your behalf over the 36 months prior to submission of the work. This should include all monies from sources with relevance to the submitted work, not just monies from the entity that sponsored the research. If there is any question, it is usually better to disclose a relationship than not to do so. Please note that your interactions with the work's sponsor outside the submitted work should be listed here. For each category list each entity on a separate line. Use as many lines as necessary to provide complete information. In addition, please disclose relationships that fall outside the 36-month window that readers may want to know about and could reasonably criticize you for not disclosing (for example, long-term financial relationships that are now ended).

The goal of this section is to provide information for our reviewers and readers about your interactions with entities in the biomedical arena that could be perceived to influence, or that give the appearance of potentially influencing, what you wrote in the submitted work. You should disclose interactions with ANY entity that could be considered broadly relevant to the work. For example, if your article is about testing an epidermal growth factor receptor (EGFR) antagonist in lung cancer, you should report all associations with entities pursuing diagnostic or therapeutic strategies in cancer in general, not just in the area of EGFR or lung cancer. For grants you have received for work outside the submitted work, you should disclose support ONLY from entities that could be perceived to benefit financially from the published work, such as drug companies, or foundations supported by entities that could be perceived to have a financial stake in the outcome. Public funding sources, such as the NIH or the MRC, need not be disclosed. For example, if the NIH sponsored a piece of work you have been involved in but drugs were provided by a pharmaceutical company, you need only list the pharmaceutical company.

#### 4. Financial relationships involving your spouse or partner or your children (under 18 years of age).

If monies from the types of relationships listed in Section 3 were paid to your spouse or partner or dependent children, please list the type of activity and source of the money.

#### 5. Nonfinancial associations.

Please report any personal, professional, political, institutional, religious, or other associations that a reasonable reader would want to know about in relation to the submitted work.



## ICMJE Uniform Disclosure Form for Potential Conflicts of Interest

### Section 1. Identifying Information.

Given Name:  Surname:  Effective Date:

Format example: 07-August-2008

Are you the corresponding author?  Yes  No

Corresponding author's name:

Manuscript Title:

Manuscript Identifying Number (if you know it):

### Section 2. Information about the support of the work under consideration for publication.

Did you or your institution at any time receive payment or support in kind for any aspect of the submitted work (including but not limited to grants, data monitoring board, study design, manuscript preparation, statistical analysis, etc...)?

No

Yes, specify nature of compensation

### Section 3. Information about relevant financial relationships outside the submitted work.

Place a check in the appropriate boxes in the table to indicate whether you have financial relationships (regardless of amount of compensation) with any entities that have an interest related to the submitted work. Use one line for each entity; add as many lines as you need. Use the comments column to indicate any additional information that you think a reader or editor would want to know about the compensation. Report relationships that were present during the 36 months prior to submission. In addition please disclose relationships that fall outside the 36-month window that readers may want to know about and could reasonably criticize you for not disclosing (for example, long-term financial relationships that are now ended).

If you have more than one relationship, click "Add +" to add a row. Click "Del x" to delete an extra row.

| Type of Relationship (in alphabetical order) | No                                  | Money Paid to You                   | Money to Your institution | Entity          | Comments |       |
|----------------------------------------------|-------------------------------------|-------------------------------------|---------------------------|-----------------|----------|-------|
| Board membership                             | <input checked="" type="checkbox"/> | <input type="checkbox"/>            | <input type="checkbox"/>  |                 |          | Del x |
|                                              |                                     |                                     |                           |                 |          | Add + |
| Consultancy                                  | <input type="checkbox"/>            | <input checked="" type="checkbox"/> | <input type="checkbox"/>  | Sanofi-Aventis  | Advice   | Del x |
| Consultancy                                  | <input type="checkbox"/>            | <input checked="" type="checkbox"/> | <input type="checkbox"/>  | GlaxoSmithKline | Advice   | Del x |
| Consultancy                                  | <input type="checkbox"/>            | <input checked="" type="checkbox"/> | <input type="checkbox"/>  | Eli Lilly       | Advice   | Del x |
| Consultancy                                  | <input type="checkbox"/>            | <input checked="" type="checkbox"/> | <input type="checkbox"/>  | Novo Nordisk    | Advice   | Del x |
| Consultancy                                  | <input type="checkbox"/>            | <input checked="" type="checkbox"/> | <input type="checkbox"/>  | Astra Zeneca    | Advice   | Del x |



**ICMJE Uniform Disclosure Form for Potential Conflicts of Interest**

| Type of Relationship<br>(in alphabetical order) | No                                  | Money<br>Paid to<br>You             | Money to<br>Your<br>institution     | Entity               | Comments                                         |       |
|-------------------------------------------------|-------------------------------------|-------------------------------------|-------------------------------------|----------------------|--------------------------------------------------|-------|
| Consultancy                                     | <input type="checkbox"/>            | <input checked="" type="checkbox"/> | <input type="checkbox"/>            | BMS                  | Advice                                           | Del × |
| Consultancy                                     | <input type="checkbox"/>            | <input checked="" type="checkbox"/> | <input type="checkbox"/>            | Roche                | Advice                                           | Del × |
| Consultancy                                     | <input type="checkbox"/>            | <input checked="" type="checkbox"/> | <input type="checkbox"/>            | Medtronic            | Advice                                           | Del × |
| Consultancy                                     | <input type="checkbox"/>            | <input checked="" type="checkbox"/> | <input type="checkbox"/>            | Merck                | Advice                                           | Del × |
| Consultancy                                     | <input type="checkbox"/>            | <input checked="" type="checkbox"/> | <input type="checkbox"/>            | Bayer                | Advice                                           | Del × |
| Consultancy                                     | <input type="checkbox"/>            | <input checked="" type="checkbox"/> | <input type="checkbox"/>            | Bioavail             | Advice                                           | Del × |
| Consultancy                                     | <input type="checkbox"/>            | <input checked="" type="checkbox"/> | <input type="checkbox"/>            | Jansen Ortho         | Advice                                           | Del × |
|                                                 |                                     |                                     |                                     |                      |                                                  | Add + |
| Employment                                      | <input checked="" type="checkbox"/> | <input type="checkbox"/>            | <input type="checkbox"/>            |                      |                                                  | Del × |
|                                                 |                                     |                                     |                                     |                      |                                                  | Add + |
| Expert testimony                                | <input checked="" type="checkbox"/> | <input type="checkbox"/>            | <input type="checkbox"/>            |                      |                                                  | Del × |
|                                                 |                                     |                                     |                                     |                      |                                                  | Add + |
| Gifts                                           | <input checked="" type="checkbox"/> | <input type="checkbox"/>            | <input type="checkbox"/>            |                      |                                                  | Del × |
|                                                 |                                     |                                     |                                     |                      |                                                  | Add + |
| Grants/grants pending                           | <input type="checkbox"/>            | <input type="checkbox"/>            | <input checked="" type="checkbox"/> | Sanofi Aventis       | Clinical Trial                                   | Del × |
| Grants/grants pending                           | <input type="checkbox"/>            | <input type="checkbox"/>            | <input checked="" type="checkbox"/> | GlaxoSmithKline      | Clinical Trial                                   | Del × |
| Grants/grants pending                           | <input type="checkbox"/>            | <input type="checkbox"/>            | <input checked="" type="checkbox"/> | Novo Nordisk         | Clinical Trial                                   | Del × |
| Grants/grants pending                           | <input type="checkbox"/>            | <input type="checkbox"/>            | <input checked="" type="checkbox"/> | Merck                | Clinical Trial                                   | Del × |
| Grants/grants pending                           | <input type="checkbox"/>            | <input type="checkbox"/>            | <input checked="" type="checkbox"/> | Pronova              | Clinical Trial                                   | Del × |
| Grants/grants pending                           | <input type="checkbox"/>            | <input type="checkbox"/>            | <input checked="" type="checkbox"/> | Roche                | Clinical Trial                                   | Del × |
|                                                 |                                     |                                     |                                     |                      |                                                  | Add + |
| Honoraria                                       | <input type="checkbox"/>            | <input checked="" type="checkbox"/> | <input type="checkbox"/>            | Sanofi Aventis       | Research Committees,<br>Scientific Presentations | Del × |
| Honoraria                                       | <input type="checkbox"/>            | <input checked="" type="checkbox"/> | <input type="checkbox"/>            | GlaxoSmithKline      | Scientific Presentations                         | Del × |
| Honoraria                                       | <input type="checkbox"/>            | <input checked="" type="checkbox"/> | <input type="checkbox"/>            | Solvay               | Scientific Presentations                         | Del × |
| Honoraria                                       | <input type="checkbox"/>            | <input checked="" type="checkbox"/> | <input type="checkbox"/>            | Boehringer Ingelheim | Scientific Presentations                         | Del × |
| Honoraria                                       | <input type="checkbox"/>            | <input checked="" type="checkbox"/> | <input type="checkbox"/>            | Servier              | Scientific Video                                 | Del × |
| Honoraria                                       | <input type="checkbox"/>            | <input checked="" type="checkbox"/> | <input type="checkbox"/>            | Bayer                | Research Committee,<br>Scientific Presentations  | Del × |
| Honoraria                                       | <input type="checkbox"/>            | <input checked="" type="checkbox"/> | <input type="checkbox"/>            | Eli Lilly            | Scientific Presentations                         | Del × |
| Honoraria                                       | <input type="checkbox"/>            | <input checked="" type="checkbox"/> | <input type="checkbox"/>            | Novo Nordisk         | Scientific Presentations                         | Del × |
| Honoraria                                       | <input type="checkbox"/>            | <input checked="" type="checkbox"/> | <input type="checkbox"/>            | Takeda               | Scientific Presentation                          | Del × |



**ICMJE Uniform Disclosure Form for Potential Conflicts of Interest**

| Type of Relationship<br>(in alphabetical order)                                             | No                                  | Money<br>Paid to<br>You             | Money to<br>Your<br>institution | Entity                                                    | Comments                                                                                                      |       |
|---------------------------------------------------------------------------------------------|-------------------------------------|-------------------------------------|---------------------------------|-----------------------------------------------------------|---------------------------------------------------------------------------------------------------------------|-------|
|                                                                                             |                                     |                                     |                                 |                                                           |                                                                                                               | Add + |
| Payment for manuscript preparation                                                          | <input checked="" type="checkbox"/> | <input type="checkbox"/>            | <input type="checkbox"/>        |                                                           |                                                                                                               | Del × |
|                                                                                             |                                     |                                     |                                 |                                                           |                                                                                                               | Add + |
| Patents (planned, pending or issued)                                                        | <input checked="" type="checkbox"/> | <input type="checkbox"/>            | <input type="checkbox"/>        |                                                           |                                                                                                               | Del × |
|                                                                                             |                                     |                                     |                                 |                                                           |                                                                                                               | Add + |
| Royalties                                                                                   | <input checked="" type="checkbox"/> | <input type="checkbox"/>            | <input type="checkbox"/>        |                                                           |                                                                                                               | Del × |
|                                                                                             |                                     |                                     |                                 |                                                           |                                                                                                               | Add + |
| Payment for development of educational presentations including service on speakers' bureaus | <input checked="" type="checkbox"/> | <input type="checkbox"/>            | <input type="checkbox"/>        |                                                           |                                                                                                               | Del × |
|                                                                                             |                                     |                                     |                                 |                                                           |                                                                                                               | Add + |
| Stock/stock options                                                                         | <input checked="" type="checkbox"/> | <input type="checkbox"/>            | <input type="checkbox"/>        |                                                           |                                                                                                               | Del × |
|                                                                                             |                                     |                                     |                                 |                                                           |                                                                                                               | Add + |
| Travel/accommodations expenses covered or reimbursed                                        | <input type="checkbox"/>            | <input checked="" type="checkbox"/> | <input type="checkbox"/>        | All the above companies in the Money Paid to You category | Travel & accommodation expenses were covered for occasions for which honoraria or consultations were provided | Del × |
|                                                                                             |                                     |                                     |                                 |                                                           |                                                                                                               | Add + |
| Other (err on the side of full disclosure)                                                  | <input checked="" type="checkbox"/> | <input type="checkbox"/>            | <input type="checkbox"/>        |                                                           |                                                                                                               | Del × |
|                                                                                             |                                     |                                     |                                 |                                                           |                                                                                                               | Add + |

**Section 4. Information about financial relationships involving your spouse or partner or your children (under 18 years of age).**

Do your children or your spouse or partner have financial relationships with entities that have an interest in the content of the submitted work?

- No other relationships/conditions/circumstances that present potential conflict of interest
- Yes, the following relationships/conditions/circumstances are present (explain below):

## **ICMJE Uniform Disclosure Form for Potential Conflicts of Interest**

### **Section 5. Information about relevant nonfinancial associations.**

Do you have any relevant nonfinancial associations or interests (personal, professional, political, institutional, religious, or other) that a reasonable reader would want to know about in relation to the submitted work?

- No relevant nonfinancial relationships/conditions/circumstances to report.
- Yes, the following relevant nonfinancial relationships/conditions/circumstances are present (explain below):

At the time of manuscript acceptance, journals will ask authors to confirm and, if necessary, update their disclosure statements. On occasion, journals may ask authors to disclose further information about reported relationships.

Save Form

## **ICMJE Uniform Disclosure Form for Potential Conflicts of Interest**

### **INSTRUCTIONS:**

The purpose of this form is to provide readers of your manuscript with information about your other interests that could influence how they receive and understand your work. The form has five parts.

#### **1. Identifying information.**

Each author should submit a separate form. Provide complete information and double-check the manuscript number. If you are NOT the corresponding author please insert his or her name.

#### **2. The work under consideration for publication.**

Please provide information about the work that you have submitted for publication. The time frame for this reporting is that of the work itself, from the initial conception and planning to the present. The idea is to provide for the reader information about resources that you received, either directly or indirectly (via your institution), to enable you to complete the work. If you check the "No" box it means that you did the work without receiving any financial support from any third party -- that is, the work was supported by funds from the same institution that pays your salary and that institution did not receive third-party funds to pay you. If you or your institution did receive funds from a third party to support the work, check "Yes" along with the appropriate boxes to indicate the type of support and whether you or your institution received it.

#### **3. Relevant financial activities outside the submitted work.**

Please report all sources of revenue relevant to the submitted work that accrued either directly to you or were paid to your institution on your behalf over the 36 months prior to submission of the work. This should include all monies from sources with relevance to the submitted work, not just monies from the entity that sponsored the research. If there is any question, it is usually better to disclose a relationship than not to do so. Please note that your interactions with the work's sponsor outside the submitted work should be listed here. For each category list each entity on a separate line. Use as many lines as necessary to provide complete information. In addition, please disclose relationships that fall outside the 36-month window that readers may want to know about and could reasonably criticize you for not disclosing (for example, long-term financial relationships that are now ended).

The goal of this section is to provide information for our reviewers and readers about your interactions with entities in the bio-medical arena that could be perceived to influence, or that give the appearance of potentially influencing, what you wrote in the submitted work. You should disclose interactions with ANY entity that could be considered broadly relevant to the work. For example, if your article is about testing an epidermal growth factor receptor (EGFR) antagonist in lung cancer, you should report all associations with entities pursuing diagnostic or therapeutic strategies in cancer in general, not just in the area of EGFR or lung cancer. For grants you have received for work outside the submitted work, you should disclose support ONLY from entities that could be perceived to benefit financially from the published work, such as drug companies, or foundations supported by entities that could be perceived to have a financial stake in the outcome. Public funding sources, such as the NIH or the MRC, need not be disclosed. For example, if the NIH sponsored a piece of work you have been involved in but drugs were provided by a pharmaceutical company, you need only list the pharmaceutical company.

#### **4. Financial relationships involving your spouse or partner or your children (under 18 years of age).**

If monies from the types of relationships listed in Section 3 were paid to your spouse or partner or dependent children, please list the type of activity and source of the money.

#### **5. Nonfinancial associations.**

Please report any personal, professional, political, institutional, religious, or other associations that a reasonable reader would want to know about in relation to the submitted work.



## ICMJE Uniform Disclosure Form for Potential Conflicts of Interest

### Section 1. Identifying Information.

Given Name:  Surname:  Effective Date:

Format example: 07-August-2008

Are you the corresponding author?  Yes  No

Manuscript Title:

Manuscript Identifying Number (if you know it):

### Section 2. Information about the support of the work under consideration for publication.

Did you or your institution at any time receive payment or support in kind for any aspect of the submitted work (including but not limited to grants, data monitoring board, study design, manuscript preparation, statistical analysis, etc...)?

No

Yes, specify nature of compensation

If you have more than one relationship, click "Add +" to add a row. Click "Del x" to delete an extra row.

| Type                                                                                                                                 | Money Paid to You*                  |                                     | Money to Your Institution           |                                     | Name of Entity | Comments**                                                                                     |       |
|--------------------------------------------------------------------------------------------------------------------------------------|-------------------------------------|-------------------------------------|-------------------------------------|-------------------------------------|----------------|------------------------------------------------------------------------------------------------|-------|
|                                                                                                                                      | No                                  | Yes                                 | No                                  | Yes                                 |                |                                                                                                |       |
| Grant                                                                                                                                | <input checked="" type="checkbox"/> | <input type="checkbox"/>            | <input type="checkbox"/>            | <input checked="" type="checkbox"/> | NIH/NHLBI      | ACCORD was an NIH sponsored study and Columbia was one of the 7 Clinical Center Network sites. | Del x |
|                                                                                                                                      |                                     |                                     |                                     |                                     |                |                                                                                                | Add + |
| Consulting fee or honorarium                                                                                                         | <input checked="" type="checkbox"/> | <input type="checkbox"/>            | <input checked="" type="checkbox"/> | <input type="checkbox"/>            |                |                                                                                                | Del x |
|                                                                                                                                      |                                     |                                     |                                     |                                     |                |                                                                                                | Add + |
| Support for travel to meetings for the study or otherwise                                                                            | <input type="checkbox"/>            | <input checked="" type="checkbox"/> | <input checked="" type="checkbox"/> | <input type="checkbox"/>            | NIH/NHLBI      | The grant provided funds to travel to investigator meetings                                    | Del x |
|                                                                                                                                      |                                     |                                     |                                     |                                     |                |                                                                                                | Add + |
| Fees for participation in review activities such as data monitoring boards, statistical analysis, end point committees, and the like | <input checked="" type="checkbox"/> | <input type="checkbox"/>            | <input checked="" type="checkbox"/> | <input type="checkbox"/>            |                |                                                                                                | Del x |
|                                                                                                                                      |                                     |                                     |                                     |                                     |                |                                                                                                | Add + |

## ICMJE Uniform Disclosure Form for Potential Conflicts of Interest

| Type                                                                                            | Money Paid to You*                  |                          | Money to Your Institution           |                          | Name of Entity | Comments** |       |
|-------------------------------------------------------------------------------------------------|-------------------------------------|--------------------------|-------------------------------------|--------------------------|----------------|------------|-------|
| Payment for writing or reviewing the manuscript                                                 | <input checked="" type="checkbox"/> | <input type="checkbox"/> | <input checked="" type="checkbox"/> | <input type="checkbox"/> |                |            | Del × |
|                                                                                                 |                                     |                          |                                     |                          |                |            | Add + |
| Support in kind such as writing, provision of medicines or equipment, or administrative support | <input checked="" type="checkbox"/> | <input type="checkbox"/> | <input checked="" type="checkbox"/> | <input type="checkbox"/> |                |            | Del × |
|                                                                                                 |                                     |                          |                                     |                          |                |            | Add + |
| Other                                                                                           | <input checked="" type="checkbox"/> | <input type="checkbox"/> | <input checked="" type="checkbox"/> | <input type="checkbox"/> |                |            | Del × |
|                                                                                                 |                                     |                          |                                     |                          |                |            | Add + |

\*\*Use this section to provide any needed explanation

### Section 3. Information about relevant financial relationships outside the submitted work.

Place a check in the appropriate boxes in the table to indicate whether you have financial relationships (regardless of amount of compensation) with any entities that have an interest related to the submitted work. Use one line for each entity; add as many lines as you need. Use the comments column to indicate any additional information that you think a reader or editor would want to know about the compensation. Report relationships that were present during the 36 months prior to submission. In addition please disclose relationships that fall outside the 36-month window that readers may want to know about and could reasonably criticize you for not disclosing (for example, long-term financial relationships that are now ended).

If you have more than one relationship, click "Add +" to add a row. Click "Del ×" to delete an extra row.

| Type of Relationship (in alphabetical order) | No                       | Money Paid to You                   | Money to Your institution | Entity                | Comments                                  |       |
|----------------------------------------------|--------------------------|-------------------------------------|---------------------------|-----------------------|-------------------------------------------|-------|
| Board membership                             | <input type="checkbox"/> | <input checked="" type="checkbox"/> | <input type="checkbox"/>  | Merck                 | Global Advisory Board for Atherosclerosis | Del × |
| Board membership                             | <input type="checkbox"/> | <input checked="" type="checkbox"/> | <input type="checkbox"/>  | Merck Schering Plough | Advisory Board                            | Del × |
| Board membership                             | <input type="checkbox"/> | <input checked="" type="checkbox"/> | <input type="checkbox"/>  | BMS/AstraZeneca       | Global Advisory Board                     | Del × |
|                                              |                          |                                     |                           |                       |                                           | Add + |
| Consultancy                                  | <input type="checkbox"/> | <input checked="" type="checkbox"/> | <input type="checkbox"/>  | Merck                 | Consulting on lipid metabolism            | Del × |
| Consultancy                                  | <input type="checkbox"/> | <input checked="" type="checkbox"/> | <input type="checkbox"/>  | Abbott/Astrazeneca    | Consulting on lipid lowering agents       | Del × |
| Consultancy                                  | <input type="checkbox"/> | <input checked="" type="checkbox"/> | <input type="checkbox"/>  | BMS                   | Consulting on lipid metabolism            | Del × |
| Consultancy                                  | <input type="checkbox"/> | <input checked="" type="checkbox"/> | <input type="checkbox"/>  | Roche                 | Consulting on lipid altering drugs        | Del × |



**ICMJE Uniform Disclosure Form for Potential Conflicts of Interest**

| Type of Relationship<br>(in alphabetical order) | No                                  | Money<br>Paid to<br>You             | Money to<br>Your<br>institution | Entity                  | Comments                                        |       |
|-------------------------------------------------|-------------------------------------|-------------------------------------|---------------------------------|-------------------------|-------------------------------------------------|-------|
| Consultancy                                     | <input type="checkbox"/>            | <input checked="" type="checkbox"/> | <input type="checkbox"/>        | Isis/Genzyme            | Consulting on lipid lowering drug               | Del × |
| Consultancy                                     | <input type="checkbox"/>            | <input checked="" type="checkbox"/> | <input type="checkbox"/>        | GlaxoSmithKline         | Consulting on lipid lowering drug               | Del × |
| Consultancy                                     | <input type="checkbox"/>            | <input checked="" type="checkbox"/> | <input type="checkbox"/>        | Novartis                | Consulting on lipid lowering drug               | Del × |
| Consultancy                                     | <input type="checkbox"/>            | <input checked="" type="checkbox"/> | <input type="checkbox"/>        | Pfizer                  | Consulting on lipid lowering drug               | Del × |
| Consultancy                                     | <input type="checkbox"/>            | <input checked="" type="checkbox"/> | <input type="checkbox"/>        | Regeneron/SanofiAventis | Consulting on lipid lowering drug               | Del × |
|                                                 |                                     |                                     |                                 |                         |                                                 | Add + |
| Employment                                      | <input checked="" type="checkbox"/> | <input type="checkbox"/>            | <input type="checkbox"/>        |                         |                                                 | Del × |
|                                                 |                                     |                                     |                                 |                         |                                                 | Add + |
| Expert testimony                                | <input checked="" type="checkbox"/> | <input type="checkbox"/>            | <input type="checkbox"/>        |                         |                                                 | Del × |
|                                                 |                                     |                                     |                                 |                         |                                                 | Add + |
| Gifts                                           | <input checked="" type="checkbox"/> | <input type="checkbox"/>            | <input type="checkbox"/>        |                         |                                                 | Del × |
|                                                 |                                     |                                     |                                 |                         |                                                 | Add + |
| Grants/grants pending                           | <input type="checkbox"/>            | <input checked="" type="checkbox"/> | <input type="checkbox"/>        | Merck                   | Phase 1B study of lipid altering drug mechanism | Del × |
| Grants/grants pending                           | <input type="checkbox"/>            | <input checked="" type="checkbox"/> | <input type="checkbox"/>        | ISIS/Genzyme            | Phase 2 study of lipid lowering drug            | Del × |
| Grants/grants pending                           | <input type="checkbox"/>            | <input checked="" type="checkbox"/> | <input type="checkbox"/>        | Roche                   | Phase 3 study of lipid lowering drug            | Del × |
| Grants/grants pending                           | <input type="checkbox"/>            | <input checked="" type="checkbox"/> | <input type="checkbox"/>        | Astrazeneca             | Prelinical studies of lipid lowering drug       | Del × |
|                                                 |                                     |                                     |                                 |                         |                                                 | Add + |
| Honoraria                                       | <input checked="" type="checkbox"/> | <input type="checkbox"/>            | <input type="checkbox"/>        |                         |                                                 | Del × |
|                                                 |                                     |                                     |                                 |                         |                                                 | Add + |
| Payment for manuscript preparation              | <input checked="" type="checkbox"/> | <input type="checkbox"/>            | <input type="checkbox"/>        |                         |                                                 | Del × |
|                                                 |                                     |                                     |                                 |                         |                                                 | Add + |
| Patents (planned, pending or issued)            | <input checked="" type="checkbox"/> | <input type="checkbox"/>            | <input type="checkbox"/>        |                         |                                                 | Del × |
|                                                 |                                     |                                     |                                 |                         |                                                 | Add + |
| Royalties                                       | <input checked="" type="checkbox"/> | <input type="checkbox"/>            | <input type="checkbox"/>        |                         |                                                 | Del × |
|                                                 |                                     |                                     |                                 |                         |                                                 | Add + |



**ICMJE Uniform Disclosure Form for Potential Conflicts of Interest**

| Type of Relationship (in alphabetical order)                                                | No                                  | Money Paid to You                   | Money to Your institution | Entity                                    | Comments                                                     |       |
|---------------------------------------------------------------------------------------------|-------------------------------------|-------------------------------------|---------------------------|-------------------------------------------|--------------------------------------------------------------|-------|
| Payment for development of educational presentations including service on speakers' bureaus | <input type="checkbox"/>            | <input checked="" type="checkbox"/> | <input type="checkbox"/>  | Pfizer                                    | Helped develop a speakers slide set on diabetic dyslipidemia | Del × |
|                                                                                             |                                     |                                     |                           |                                           |                                                              | Add + |
| Stock/stock options                                                                         | <input checked="" type="checkbox"/> | <input type="checkbox"/>            | <input type="checkbox"/>  |                                           |                                                              | Del × |
|                                                                                             |                                     |                                     |                           |                                           |                                                              | Add + |
| Travel/accommodations expenses covered or reimbursed                                        | <input type="checkbox"/>            | <input checked="" type="checkbox"/> | <input type="checkbox"/>  | All of the above consulting relationships | Companies pay for travel to and from consulting meetings     | Del × |
|                                                                                             |                                     |                                     |                           |                                           |                                                              | Add + |
| Other (err on the side of full disclosure)                                                  | <input checked="" type="checkbox"/> | <input type="checkbox"/>            | <input type="checkbox"/>  |                                           |                                                              | Del × |
|                                                                                             |                                     |                                     |                           |                                           |                                                              | Add + |

**Section 4. Information about financial relationships involving your spouse or partner or your children (under 18 years of age).**

Do your children or your spouse or partner have financial relationships with entities that have an interest in the content of the submitted work?

- No other relationships/conditions/circumstances that present potential conflict of interest
- Yes, the following relationships/conditions/circumstances are present (explain below):

**Section 5. Information about relevant nonfinancial associations.**

Do you have any relevant nonfinancial associations or interests (personal, professional, political, institutional, religious, or other) that a reasonable reader would want to know about in relation to the submitted work?

- No relevant nonfinancial relationships/conditions/circumstances to report.
- Yes, the following relevant nonfinancial relationships/conditions/circumstances are present (explain below):

At the time of manuscript acceptance, journals will ask authors to confirm and, if necessary, update their disclosure statements. On occasion, journals may ask authors to disclose further information about reported relationships.

Save Form

## **ICMJE Uniform Disclosure Form for Potential Conflicts of Interest**

### **INSTRUCTIONS:**

The purpose of this form is to provide readers of your manuscript with information about your other interests that could influence how they receive and understand your work. The form has five parts.

#### **1. Identifying information.**

Each author should submit a separate form. Provide complete information and double-check the manuscript number. If you are NOT the corresponding author please insert his or her name.

#### **2. The work under consideration for publication.**

Please provide information about the work that you have submitted for publication. The time frame for this reporting is that of the work itself, from the initial conception and planning to the present. The idea is to provide for the reader information about resources that you received, either directly or indirectly (via your institution), to enable you to complete the work. If you check the "No" box it means that you did the work without receiving any financial support from any third party -- that is, the work was supported by funds from the same institution that pays your salary and that institution did not receive third-party funds to pay you. If you or your institution did receive funds from a third party to support the work, check "Yes" along with the appropriate boxes to indicate the type of support and whether you or your institution received it.

#### **3. Relevant financial activities outside the submitted work.**

Please report all sources of revenue relevant to the submitted work that accrued either directly to you or were paid to your institution on your behalf over the 36 months prior to submission of the work. This should include all monies from sources with relevance to the submitted work, not just monies from the entity that sponsored the research. If there is any question, it is usually better to disclose a relationship than not to do so. Please note that your interactions with the work's sponsor outside the submitted work should be listed here. For each category list each entity on a separate line. Use as many lines as necessary to provide complete information. In addition, please disclose relationships that fall outside the 36-month window that readers may want to know about and could reasonably criticize you for not disclosing (for example, long-term financial relationships that are now ended).

The goal of this section is to provide information for our reviewers and readers about your interactions with entities in the biomedical arena that could be perceived to influence, or that give the appearance of potentially influencing, what you wrote in the submitted work. You should disclose interactions with ANY entity that could be considered broadly relevant to the work. For example, if your article is about testing an epidermal growth factor receptor (EGFR) antagonist in lung cancer, you should report all associations with entities pursuing diagnostic or therapeutic strategies in cancer in general, not just in the area of EGFR or lung cancer. For grants you have received for work outside the submitted work, you should disclose support ONLY from entities that could be perceived to benefit financially from the published work, such as drug companies, or foundations supported by entities that could be perceived to have a financial stake in the outcome. Public funding sources, such as the NIH or the MRC, need not be disclosed. For example, if the NIH sponsored a piece of work you have been involved in but drugs were provided by a pharmaceutical company, you need only list the pharmaceutical company.

#### **4. Financial relationships involving your spouse or partner or your children (under 18 years of age).**

If monies from the types of relationships listed in Section 3 were paid to your spouse or partner or dependent children, please list the type of activity and source of the money.

#### **5. Nonfinancial associations.**

Please report any personal, professional, political, institutional, religious, or other associations that a reasonable reader would want to know about in relation to the submitted work.



## ICMJE Uniform Disclosure Form for Potential Conflicts of Interest

### Section 1. Identifying Information.

Given Name:  Surname:  Effective Date:

Format example: 07-August-2008

Are you the corresponding author?  Yes  No

Corresponding author's name:

Manuscript Title:

Manuscript Identifying Number (if you know it):

### Section 2. Information about the support of the work under consideration for publication.

Did you or your institution at any time receive payment or support in kind for any aspect of the submitted work (including but not limited to grants, data monitoring board, study design, manuscript preparation, statistical analysis, etc...)?

No

Yes, specify nature of compensation

If you have more than one relationship, click "Add +" to add a row. Click "Del x" to delete an extra row.

| Type                                                                                                                                 | Money Paid to You*                  |                          | Money to Your Institution           |                                     | Name of Entity | Comments** |       |
|--------------------------------------------------------------------------------------------------------------------------------------|-------------------------------------|--------------------------|-------------------------------------|-------------------------------------|----------------|------------|-------|
|                                                                                                                                      | No                                  | Yes                      | No                                  | Yes                                 |                |            |       |
| Grant                                                                                                                                | <input checked="" type="checkbox"/> | <input type="checkbox"/> | <input type="checkbox"/>            | <input checked="" type="checkbox"/> | NHLBI          |            | Del x |
|                                                                                                                                      |                                     |                          |                                     |                                     |                |            | Add + |
| Consulting fee or honorarium                                                                                                         | <input checked="" type="checkbox"/> | <input type="checkbox"/> | <input checked="" type="checkbox"/> | <input type="checkbox"/>            |                |            | Del x |
|                                                                                                                                      |                                     |                          |                                     |                                     |                |            | Add + |
| Support for travel to meetings for the study or otherwise                                                                            | <input checked="" type="checkbox"/> | <input type="checkbox"/> | <input checked="" type="checkbox"/> | <input type="checkbox"/>            |                |            | Del x |
|                                                                                                                                      |                                     |                          |                                     |                                     |                |            | Add + |
| Fees for participation in review activities such as data monitoring boards, statistical analysis, end point committees, and the like | <input checked="" type="checkbox"/> | <input type="checkbox"/> | <input checked="" type="checkbox"/> | <input type="checkbox"/>            |                |            | Del x |
|                                                                                                                                      |                                     |                          |                                     |                                     |                |            | Add + |
| Payment for writing or reviewing the manuscript                                                                                      | <input checked="" type="checkbox"/> | <input type="checkbox"/> | <input checked="" type="checkbox"/> | <input type="checkbox"/>            |                |            | Del x |



**ICMJE Uniform Disclosure Form for Potential Conflicts of Interest**

| Type                                                                                            | Money Paid to You*                  |                          | Money to Your Institution           |                          | Name of Entity | Comments** |       |
|-------------------------------------------------------------------------------------------------|-------------------------------------|--------------------------|-------------------------------------|--------------------------|----------------|------------|-------|
|                                                                                                 |                                     |                          |                                     |                          |                |            | Add + |
| Support in kind such as writing, provision of medicines or equipment, or administrative support | <input checked="" type="checkbox"/> | <input type="checkbox"/> | <input checked="" type="checkbox"/> | <input type="checkbox"/> |                |            | Del × |
|                                                                                                 |                                     |                          |                                     |                          |                |            | Add + |
| Other                                                                                           | <input checked="" type="checkbox"/> | <input type="checkbox"/> | <input checked="" type="checkbox"/> | <input type="checkbox"/> |                |            | Del × |
|                                                                                                 |                                     |                          |                                     |                          |                |            | Add + |

\*\*Use this section to provide any needed explanation

**Section 3. Information about relevant financial relationships outside the submitted work.**

Place a check in the appropriate boxes in the table to indicate whether you have financial relationships (regardless of amount of compensation) with any entities that have an interest related to the submitted work. Use one line for each entity; add as many lines as you need. Use the comments column to indicate any additional information that you think a reader or editor would want to know about the compensation. Report relationships that were present during the 36 months prior to submission. In addition please disclose relationships that fall outside the 36-month window that readers may want to know about and could reasonably criticize you for not disclosing (for example, long-term financial relationships that are now ended).

If you have more than one relationship, click "Add +" to add a row. Click "Del ×" to delete an extra row.

| Type of Relationship (in alphabetical order) | No                                  | Money Paid to You        | Money to Your institution | Entity | Comments |       |
|----------------------------------------------|-------------------------------------|--------------------------|---------------------------|--------|----------|-------|
| Board membership                             | <input checked="" type="checkbox"/> | <input type="checkbox"/> | <input type="checkbox"/>  |        |          | Del × |
|                                              |                                     |                          |                           |        |          | Add + |
| Consultancy                                  | <input checked="" type="checkbox"/> | <input type="checkbox"/> | <input type="checkbox"/>  |        |          | Del × |
|                                              |                                     |                          |                           |        |          | Add + |
| Employment                                   | <input checked="" type="checkbox"/> | <input type="checkbox"/> | <input type="checkbox"/>  |        |          | Del × |
|                                              |                                     |                          |                           |        |          | Add + |
| Expert testimony                             | <input checked="" type="checkbox"/> | <input type="checkbox"/> | <input type="checkbox"/>  |        |          | Del × |
|                                              |                                     |                          |                           |        |          | Add + |
| Gifts                                        | <input checked="" type="checkbox"/> | <input type="checkbox"/> | <input type="checkbox"/>  |        |          | Del × |
|                                              |                                     |                          |                           |        |          | Add + |



**ICMJE Uniform Disclosure Form for Potential Conflicts of Interest**

| Type of Relationship<br>(in alphabetical order)                                                      | No                                  | Money<br>Paid to<br>You             | Money to<br>Your<br>institution     | Entity | Comments                                           |       |
|------------------------------------------------------------------------------------------------------|-------------------------------------|-------------------------------------|-------------------------------------|--------|----------------------------------------------------|-------|
| Grants/grants pending                                                                                | <input type="checkbox"/>            | <input type="checkbox"/>            | <input checked="" type="checkbox"/> | Merck  | Diabetes medication trial<br>clinical center       | Del × |
|                                                                                                      |                                     |                                     |                                     |        |                                                    | Add + |
| Honoraria                                                                                            | <input checked="" type="checkbox"/> | <input type="checkbox"/>            | <input type="checkbox"/>            |        |                                                    | Del × |
|                                                                                                      |                                     |                                     |                                     |        |                                                    | Add + |
| Payment for manuscript<br>preparation                                                                | <input checked="" type="checkbox"/> | <input type="checkbox"/>            | <input type="checkbox"/>            |        |                                                    | Del × |
|                                                                                                      |                                     |                                     |                                     |        |                                                    | Add + |
| Patents (planned, pending or<br>issued)                                                              | <input checked="" type="checkbox"/> | <input type="checkbox"/>            | <input type="checkbox"/>            |        |                                                    | Del × |
|                                                                                                      |                                     |                                     |                                     |        |                                                    | Add + |
| Royalties                                                                                            | <input checked="" type="checkbox"/> | <input type="checkbox"/>            | <input type="checkbox"/>            |        |                                                    | Del × |
|                                                                                                      |                                     |                                     |                                     |        |                                                    | Add + |
| Payment for development of<br>educational presentations<br>including service on speakers'<br>bureaus | <input checked="" type="checkbox"/> | <input type="checkbox"/>            | <input type="checkbox"/>            |        |                                                    | Del × |
|                                                                                                      |                                     |                                     |                                     |        |                                                    | Add + |
| Stock/stock options                                                                                  | <input checked="" type="checkbox"/> | <input type="checkbox"/>            | <input type="checkbox"/>            |        |                                                    | Del × |
|                                                                                                      |                                     |                                     |                                     |        |                                                    | Add + |
| Travel/accommodations<br>expenses covered or<br>reimbursed                                           | <input checked="" type="checkbox"/> | <input type="checkbox"/>            | <input type="checkbox"/>            |        |                                                    | Del × |
|                                                                                                      |                                     |                                     |                                     |        |                                                    | Add + |
| Other (err on the side of full<br>disclosure)                                                        | <input type="checkbox"/>            | <input checked="" type="checkbox"/> | <input type="checkbox"/>            | Takeda | DSMB member for trial of a<br>diabetes medication. | Del × |
|                                                                                                      |                                     |                                     |                                     |        |                                                    | Add + |

**Section 4. Information about financial relationships involving your spouse or partner or your children (under 18 years of age).**

Do your children or your spouse or partner have financial relationships with entities that have an interest in the content of the submitted work?

- No other relationships/conditions/circumstances that present potential conflict of interest
- Yes, the following relationships/conditions/circumstances are present (explain below):

## ICMJE Uniform Disclosure Form for Potential Conflicts of Interest

### Section 5. Information about relevant nonfinancial associations.

Do you have any relevant nonfinancial associations or interests (personal, professional, political, institutional, religious, or other) that a reasonable reader would want to know about in relation to the submitted work?

- No relevant nonfinancial relationships/conditions/circumstances to report.
- Yes, the following relevant nonfinancial relationships/conditions/circumstances are present (explain below):

At the time of manuscript acceptance, journals will ask authors to confirm and, if necessary, update their disclosure statements. On occasion, journals may ask authors to disclose further information about reported relationships.

Save Form

## **ICMJE Uniform Disclosure Form for Potential Conflicts of Interest**

### **INSTRUCTIONS:**

The purpose of this form is to provide readers of your manuscript with information about your other interests that could influence how they receive and understand your work. The form has five parts.

#### **1. Identifying information.**

Each author should submit a separate form. Provide complete information and double-check the manuscript number. If you are NOT the corresponding author please insert his or her name.

#### **2. The work under consideration for publication.**

Please provide information about the work that you have submitted for publication. The time frame for this reporting is that of the work itself, from the initial conception and planning to the present. The idea is to provide for the reader information about resources that you received, either directly or indirectly (via your institution), to enable you to complete the work. If you check the "No" box it means that you did the work without receiving any financial support from any third party -- that is, the work was supported by funds from the same institution that pays your salary and that institution did not receive third-party funds to pay you. If you or your institution did receive funds from a third party to support the work, check "Yes" along with the appropriate boxes to indicate the type of support and whether you or your institution received it.

#### **3. Relevant financial activities outside the submitted work.**

Please report all sources of revenue relevant to the submitted work that accrued either directly to you or were paid to your institution on your behalf over the 36 months prior to submission of the work. This should include all monies from sources with relevance to the submitted work, not just monies from the entity that sponsored the research. If there is any question, it is usually better to disclose a relationship than not to do so. Please note that your interactions with the work's sponsor outside the submitted work should be listed here. For each category list each entity on a separate line. Use as many lines as necessary to provide complete information. In addition, please disclose relationships that fall outside the 36-month window that readers may want to know about and could reasonably criticize you for not disclosing (for example, long-term financial relationships that are now ended).

The goal of this section is to provide information for our reviewers and readers about your interactions with entities in the bio-medical arena that could be perceived to influence, or that give the appearance of potentially influencing, what you wrote in the submitted work. You should disclose interactions with ANY entity that could be considered broadly relevant to the work. For example, if your article is about testing an epidermal growth factor receptor (EGFR) antagonist in lung cancer, you should report all associations with entities pursuing diagnostic or therapeutic strategies in cancer in general, not just in the area of EGFR or lung cancer. For grants you have received for work outside the submitted work, you should disclose support ONLY from entities that could be perceived to benefit financially from the published work, such as drug companies, or foundations supported by entities that could be perceived to have a financial stake in the outcome. Public funding sources, such as the NIH or the MRC, need not be disclosed. For example, if the NIH sponsored a piece of work you have been involved in but drugs were provided by a pharmaceutical company, you need only list the pharmaceutical company.

#### **4. Financial relationships involving your spouse or partner or your children (under 18 years of age).**

If monies from the types of relationships listed in Section 3 were paid to your spouse or partner or dependent children, please list the type of activity and source of the money.

#### **5. Nonfinancial associations.**

Please report any personal, professional, political, institutional, religious, or other associations that a reasonable reader would want to know about in relation to the submitted work.



## ICMJE Uniform Disclosure Form for Potential Conflicts of Interest

### Section 1. Identifying Information.

Given Name:  Surname:  Effective Date:

Format example: 07-August-2008

Are you the corresponding author?  Yes  No

Corresponding author's name:

Manuscript Title:

Manuscript Identifying Number (if you know it):

### Section 2. Information about the support of the work under consideration for publication.

Did you or your institution at any time receive payment or support in kind for any aspect of the submitted work (including but not limited to grants, data monitoring board, study design, manuscript preparation, statistical analysis, etc...)?

No

Yes, specify nature of compensation

### Section 3. Information about relevant financial relationships outside the submitted work.

Place a check in the appropriate boxes in the table to indicate whether you have financial relationships (regardless of amount of compensation) with any entities that have an interest related to the submitted work. Use one line for each entity; add as many lines as you need. Use the comments column to indicate any additional information that you think a reader or editor would want to know about the compensation. Report relationships that were present during the 36 months prior to submission. In addition please disclose relationships that fall outside the 36-month window that readers may want to know about and could reasonably criticize you for not disclosing (for example, long-term financial relationships that are now ended).

If you have more than one relationship, click "Add +" to add a row. Click "Del x" to delete an extra row.

| Type of Relationship (in alphabetical order) | No                                  | Money Paid to You                   | Money to Your institution | Entity                               | Comments                                         |       |
|----------------------------------------------|-------------------------------------|-------------------------------------|---------------------------|--------------------------------------|--------------------------------------------------|-------|
| Board membership                             | <input type="checkbox"/>            | <input checked="" type="checkbox"/> | <input type="checkbox"/>  | DSMB MEMBER                          | FOR 2 VARENICLINE STUDIES                        | Del x |
|                                              |                                     |                                     |                           |                                      |                                                  | Add + |
| Consultancy                                  | <input type="checkbox"/>            | <input checked="" type="checkbox"/> | <input type="checkbox"/>  | SPEAKER FOR PFIZER, MERCK & NOVARTIS | CME LECTURES ON HYPERTENSION AND RISK ASSESSMENT | Del x |
|                                              |                                     |                                     |                           |                                      |                                                  | Add + |
| Employment                                   | <input checked="" type="checkbox"/> | <input type="checkbox"/>            | <input type="checkbox"/>  |                                      |                                                  | Del x |
|                                              |                                     |                                     |                           |                                      |                                                  | Add + |



**ICMJE Uniform Disclosure Form for Potential Conflicts of Interest**

| Type of Relationship<br>(in alphabetical order)                                                      | No                                  | Money<br>Paid to<br>You             | Money to<br>Your<br>institution     | Entity                                             | Comments                                                                         |       |
|------------------------------------------------------------------------------------------------------|-------------------------------------|-------------------------------------|-------------------------------------|----------------------------------------------------|----------------------------------------------------------------------------------|-------|
| Expert testimony                                                                                     | <input checked="" type="checkbox"/> | <input type="checkbox"/>            | <input type="checkbox"/>            |                                                    |                                                                                  | Del × |
|                                                                                                      |                                     |                                     |                                     |                                                    |                                                                                  | Add + |
| Gifts                                                                                                | <input checked="" type="checkbox"/> | <input type="checkbox"/>            | <input type="checkbox"/>            |                                                    |                                                                                  | Del × |
|                                                                                                      |                                     |                                     |                                     |                                                    |                                                                                  | Add + |
| Grants/grants pending                                                                                | <input type="checkbox"/>            | <input checked="" type="checkbox"/> | <input checked="" type="checkbox"/> | PFIZER/NOVARTIS<br>MERCK                           | GRANTS FOR MULTISITE<br>TRIALS CLINICAL CENTER<br><br>GRANT NOVARTIS<br>AIM HIGH | Del × |
|                                                                                                      |                                     |                                     |                                     |                                                    |                                                                                  | Add + |
| Honoraria                                                                                            | <input type="checkbox"/>            | <input checked="" type="checkbox"/> | <input type="checkbox"/>            | PFIZER, MERCK NOVARTIS,<br>FOREST, SCHERING-PLOUGH | CMF LECTURES<br>INVESTIGATOR MEETINGS                                            | Del × |
|                                                                                                      |                                     |                                     |                                     |                                                    |                                                                                  | Add + |
| Payment for manuscript<br>preparation                                                                | <input checked="" type="checkbox"/> | <input type="checkbox"/>            | <input type="checkbox"/>            |                                                    |                                                                                  | Del × |
|                                                                                                      |                                     |                                     |                                     |                                                    |                                                                                  | Add + |
| Patents (planned, pending or<br>issued)                                                              | <input checked="" type="checkbox"/> | <input type="checkbox"/>            | <input type="checkbox"/>            |                                                    |                                                                                  | Del × |
|                                                                                                      |                                     |                                     |                                     |                                                    |                                                                                  | Add + |
| Royalties                                                                                            | <input checked="" type="checkbox"/> | <input type="checkbox"/>            | <input type="checkbox"/>            |                                                    |                                                                                  | Del × |
|                                                                                                      |                                     |                                     |                                     |                                                    |                                                                                  | Add + |
| Payment for development of<br>educational presentations<br>including service on speakers'<br>bureaus | <input checked="" type="checkbox"/> | <input type="checkbox"/>            | <input type="checkbox"/>            |                                                    |                                                                                  | Del × |
|                                                                                                      |                                     |                                     |                                     |                                                    |                                                                                  | Add + |
| Stock/stock options                                                                                  | <input checked="" type="checkbox"/> | <input type="checkbox"/>            | <input type="checkbox"/>            |                                                    |                                                                                  | Del × |
|                                                                                                      |                                     |                                     |                                     |                                                    |                                                                                  | Add + |
| Travel/accommodations<br>expenses covered or<br>reimbursed                                           | <input type="checkbox"/>            | <input checked="" type="checkbox"/> | <input type="checkbox"/>            | PFIZER, TAKEDA, MERCK,<br>NOVARTIS, ROCHE          | MONEY FOR TRIPS WHICH<br>WAS REIMBURSED                                          | Del × |
|                                                                                                      |                                     |                                     |                                     |                                                    |                                                                                  | Add + |

## ICMJE Uniform Disclosure Form for Potential Conflicts of Interest

| Type of Relationship<br>(in alphabetical order) | No                       | Money<br>Paid to<br>You             | Money to<br>Your<br>institution | Entity                                                                                         | Comments                                                                                                                          |       |
|-------------------------------------------------|--------------------------|-------------------------------------|---------------------------------|------------------------------------------------------------------------------------------------|-----------------------------------------------------------------------------------------------------------------------------------|-------|
| Other (err on the side of full disclosure)      | <input type="checkbox"/> | <input checked="" type="checkbox"/> | <input type="checkbox"/>        | TAKEDA<br><br>ASTRA - ZENECA<br>MEXICO<br><br>INVESTIGATOR MEETINGS<br>MERCK, NOVARTIS, PFIZER | LECTURE ON<br>CHLORTHALIDONE AT US<br>HEADQUARTERS<br><br>ORGANIZED SYMPOSIUM FOR<br>MEXICAN CARDIOLOGISTS AT<br>CLEVELAND CLINIC | Del × |
|                                                 |                          |                                     |                                 |                                                                                                |                                                                                                                                   | Add + |

### Section 4. Information about financial relationships involving your spouse or partner or your children (under 18 years of age).

Do your children or your spouse or partner have financial relationships with entities that have an interest in the content of the submitted work?

- No other relationships/conditions/circumstances that present potential conflict of interest
- Yes, the following relationships/conditions/circumstances are present (explain below):

### Section 5. Information about relevant nonfinancial associations.

Do you have any relevant nonfinancial associations or interests (personal, professional, political, institutional, religious, or other) that a reasonable reader would want to know about in relation to the submitted work?

- No relevant nonfinancial relationships/conditions/circumstances to report.
- Yes, the following relevant nonfinancial relationships/conditions/circumstances are present (explain below):

At the time of manuscript acceptance, journals will ask authors to confirm and, if necessary, update their disclosure statements. On occasion, journals may ask authors to disclose further information about reported relationships.

Save Form

## **ICMJE Uniform Disclosure Form for Potential Conflicts of Interest**

### **INSTRUCTIONS:**

The purpose of this form is to provide readers of your manuscript with information about your other interests that could influence how they receive and understand your work. The form has five parts.

#### **1. Identifying information.**

Each author should submit a separate form. Provide complete information and double-check the manuscript number. If you are NOT the corresponding author please insert his or her name.

#### **2. The work under consideration for publication.**

Please provide information about the work that you have submitted for publication. The time frame for this reporting is that of the work itself, from the initial conception and planning to the present. The idea is to provide for the reader information about resources that you received, either directly or indirectly (via your institution), to enable you to complete the work. If you check the "No" box it means that you did the work without receiving any financial support from any third party -- that is, the work was supported by funds from the same institution that pays your salary and that institution did not receive third-party funds to pay you. If you or your institution did receive funds from a third party to support the work, check "Yes" along with the appropriate boxes to indicate the type of support and whether you or your institution received it.

#### **3. Relevant financial activities outside the submitted work.**

Please report all sources of revenue relevant to the submitted work that accrued either directly to you or were paid to your institution on your behalf over the 36 months prior to submission of the work. This should include all monies from sources with relevance to the submitted work, not just monies from the entity that sponsored the research. If there is any question, it is usually better to disclose a relationship than not to do so. Please note that your interactions with the work's sponsor outside the submitted work should be listed here. For each category list each entity on a separate line. Use as many lines as necessary to provide complete information. In addition, please disclose relationships that fall outside the 36-month window that readers may want to know about and could reasonably criticize you for not disclosing (for example, long-term financial relationships that are now ended).

The goal of this section is to provide information for our reviewers and readers about your interactions with entities in the bio-medical arena that could be perceived to influence, or that give the appearance of potentially influencing, what you wrote in the submitted work. You should disclose interactions with ANY entity that could be considered broadly relevant to the work. For example, if your article is about testing an epidermal growth factor receptor (EGFR) antagonist in lung cancer, you should report all associations with entities pursuing diagnostic or therapeutic strategies in cancer in general, not just in the area of EGFR or lung cancer. For grants you have received for work outside the submitted work, you should disclose support ONLY from entities that could be perceived to benefit financially from the published work, such as drug companies, or foundations supported by entities that could be perceived to have a financial stake in the outcome. Public funding sources, such as the NIH or the MRC, need not be disclosed. For example, if the NIH sponsored a piece of work you have been involved in but drugs were provided by a pharmaceutical company, you need only list the pharmaceutical company.

#### **4. Financial relationships involving your spouse or partner or your children (under 18 years of age).**

If monies from the types of relationships listed in Section 3 were paid to your spouse or partner or dependent children, please list the type of activity and source of the money.

#### **5. Nonfinancial associations.**

Please report any personal, professional, political, institutional, religious, or other associations that a reasonable reader would want to know about in relation to the submitted work.



## ICMJE Uniform Disclosure Form for Potential Conflicts of Interest

### Section 1. Identifying Information.

Given Name:  Surname:  Effective Date:

(or first)

(or last)

Format example: 07-August-2008

Are you the corresponding author?  Yes  No

Corresponding author's name:

Manuscript Title:

Manuscript Identifying Number (if you know it):

### Section 2. Information about the support of the work under consideration for publication.

Did you or your institution at any time receive payment or support in kind for any aspect of the submitted work (including but not limited to grants, data monitoring board, study design, manuscript preparation, statistical analysis, etc...)?

No

Yes, specify nature of compensation

### Section 3. Information about relevant financial relationships outside the submitted work.

Place a check in the appropriate boxes in the table to indicate whether you have financial relationships (regardless of amount of compensation) with any entities that have an interest related to the submitted work. Use one line for each entity; add as many lines as you need. Use the comments column to indicate any additional information that you think a reader or editor would want to know about the compensation. Report relationships that were present during the 36 months prior to submission. In addition please disclose relationships that fall outside the 36-month window that readers may want to know about and could reasonably criticize you for not disclosing (for example, long-term financial relationships that are now ended).

If you have more than one relationship, click "Add +" to add a row. Click "Del x" to delete an extra row.

| Type of Relationship (in alphabetical order) | No                                  | Money Paid to You        | Money to Your institution | Entity | Comments |       |
|----------------------------------------------|-------------------------------------|--------------------------|---------------------------|--------|----------|-------|
| Board membership                             | <input checked="" type="checkbox"/> | <input type="checkbox"/> | <input type="checkbox"/>  |        |          | Del x |
|                                              |                                     |                          |                           |        |          | Add + |
| Consultancy                                  | <input checked="" type="checkbox"/> | <input type="checkbox"/> | <input type="checkbox"/>  |        |          | Del x |
|                                              |                                     |                          |                           |        |          | Add + |
| Employment                                   | <input checked="" type="checkbox"/> | <input type="checkbox"/> | <input type="checkbox"/>  |        |          | Del x |
|                                              |                                     |                          |                           |        |          | Add + |



**ICMJE Uniform Disclosure Form for Potential Conflicts of Interest**

| Type of Relationship<br>(in alphabetical order)                                                      | No                                  | Money<br>Paid to<br>You  | Money to<br>Your<br>institution     | Entity | Comments        |       |
|------------------------------------------------------------------------------------------------------|-------------------------------------|--------------------------|-------------------------------------|--------|-----------------|-------|
| Expert testimony                                                                                     | <input checked="" type="checkbox"/> | <input type="checkbox"/> | <input type="checkbox"/>            |        |                 | Del × |
|                                                                                                      |                                     |                          |                                     |        |                 | Add + |
| Gifts                                                                                                | <input checked="" type="checkbox"/> | <input type="checkbox"/> | <input type="checkbox"/>            |        |                 | Del × |
|                                                                                                      |                                     |                          |                                     |        |                 | Add + |
| Grants/grants pending                                                                                | <input type="checkbox"/>            | <input type="checkbox"/> | <input checked="" type="checkbox"/> | NIH    |                 | Del × |
|                                                                                                      |                                     |                          |                                     |        |                 | Add + |
| Honoraria                                                                                            | <input checked="" type="checkbox"/> | <input type="checkbox"/> | <input type="checkbox"/>            |        |                 | Del × |
|                                                                                                      |                                     |                          |                                     |        |                 | Add + |
| Payment for manuscript<br>preparation                                                                | <input checked="" type="checkbox"/> | <input type="checkbox"/> | <input type="checkbox"/>            |        |                 | Del × |
|                                                                                                      |                                     |                          |                                     |        |                 | Add + |
| Patents (planned, pending or<br>issued)                                                              | <input checked="" type="checkbox"/> | <input type="checkbox"/> | <input type="checkbox"/>            |        |                 | Del × |
|                                                                                                      |                                     |                          |                                     |        |                 | Add + |
| Royalties                                                                                            | <input checked="" type="checkbox"/> | <input type="checkbox"/> | <input type="checkbox"/>            |        |                 | Del × |
|                                                                                                      |                                     |                          |                                     |        |                 | Add + |
| Payment for development of<br>educational presentations<br>including service on speakers'<br>bureaus | <input checked="" type="checkbox"/> | <input type="checkbox"/> | <input type="checkbox"/>            |        |                 | Del × |
|                                                                                                      |                                     |                          |                                     |        |                 | Add + |
| Stock/stock options                                                                                  | <input checked="" type="checkbox"/> | <input type="checkbox"/> | <input type="checkbox"/>            |        |                 | Del × |
|                                                                                                      |                                     |                          |                                     |        |                 | Add + |
| Travel/accommodations<br>expenses covered or<br>reimbursed                                           | <input type="checkbox"/>            | <input type="checkbox"/> | <input checked="" type="checkbox"/> | NIH    | ACCORD meetings | Del × |
|                                                                                                      |                                     |                          |                                     |        |                 | Add + |
| Other (err on the side of full<br>disclosure)                                                        | <input checked="" type="checkbox"/> | <input type="checkbox"/> | <input type="checkbox"/>            |        |                 | Del × |
|                                                                                                      |                                     |                          |                                     |        |                 | Add + |

## **ICMJE Uniform Disclosure Form for Potential Conflicts of Interest**

### **Section 4. Information about financial relationships involving your spouse or partner or your children (under 18 years of age).**

Do your children or your spouse or partner have financial relationships with entities that have an interest in the content of the submitted work?

- No other relationships/conditions/circumstances that present potential conflict of interest
- Yes, the following relationships/conditions/circumstances are present (explain below):

### **Section 5. Information about relevant nonfinancial associations.**

Do you have any relevant nonfinancial associations or interests (personal, professional, political, institutional, religious, or other) that a reasonable reader would want to know about in relation to the submitted work?

- No relevant nonfinancial relationships/conditions/circumstances to report.
- Yes, the following relevant nonfinancial relationships/conditions/circumstances are present (explain below):

At the time of manuscript acceptance, journals will ask authors to confirm and, if necessary, update their disclosure statements. On occasion, journals may ask authors to disclose further information about reported relationships.

Save Form

## **ICMJE Uniform Disclosure Form for Potential Conflicts of Interest**

### **INSTRUCTIONS:**

The purpose of this form is to provide readers of your manuscript with information about your other interests that could influence how they receive and understand your work. The form has five parts.

#### **1. Identifying information.**

Each author should submit a separate form. Provide complete information and double-check the manuscript number. If you are NOT the corresponding author please insert his or her name.

#### **2. The work under consideration for publication.**

Please provide information about the work that you have submitted for publication. The time frame for this reporting is that of the work itself, from the initial conception and planning to the present. The idea is to provide for the reader information about resources that you received, either directly or indirectly (via your institution), to enable you to complete the work. If you check the "No" box it means that you did the work without receiving any financial support from any third party -- that is, the work was supported by funds from the same institution that pays your salary and that institution did not receive third-party funds to pay you. If you or your institution did receive funds from a third party to support the work, check "Yes" along with the appropriate boxes to indicate the type of support and whether you or your institution received it.

#### **3. Relevant financial activities outside the submitted work.**

Please report all sources of revenue relevant to the submitted work that accrued either directly to you or were paid to your institution on your behalf over the 36 months prior to submission of the work. This should include all monies from sources with relevance to the submitted work, not just monies from the entity that sponsored the research. If there is any question, it is usually better to disclose a relationship than not to do so. Please note that your interactions with the work's sponsor outside the submitted work should be listed here. For each category list each entity on a separate line. Use as many lines as necessary to provide complete information. In addition, please disclose relationships that fall outside the 36-month window that readers may want to know about and could reasonably criticize you for not disclosing (for example, long-term financial relationships that are now ended).

The goal of this section is to provide information for our reviewers and readers about your interactions with entities in the biomedical arena that could be perceived to influence, or that give the appearance of potentially influencing, what you wrote in the submitted work. You should disclose interactions with ANY entity that could be considered broadly relevant to the work. For example, if your article is about testing an epidermal growth factor receptor (EGFR) antagonist in lung cancer, you should report all associations with entities pursuing diagnostic or therapeutic strategies in cancer in general, not just in the area of EGFR or lung cancer. For grants you have received for work outside the submitted work, you should disclose support ONLY from entities that could be perceived to benefit financially from the published work, such as drug companies, or foundations supported by entities that could be perceived to have a financial stake in the outcome. Public funding sources, such as the NIH or the MRC, need not be disclosed. For example, if the NIH sponsored a piece of work you have been involved in but drugs were provided by a pharmaceutical company, you need only list the pharmaceutical company.

#### **4. Financial relationships involving your spouse or partner or your children (under 18 years of age).**

If monies from the types of relationships listed in Section 3 were paid to your spouse or partner or dependent children, please list the type of activity and source of the money.

#### **5. Nonfinancial associations.**

Please report any personal, professional, political, institutional, religious, or other associations that a reasonable reader would want to know about in relation to the submitted work.



## ICMJE Uniform Disclosure Form for Potential Conflicts of Interest

### Section 1. Identifying Information.

Given Name:  Surname:  Effective Date:

(or first)

(or last)

Format example: 07-August-2008

Are you the corresponding author?  Yes  No

Corresponding author's name:

Manuscript Title:

Manuscript Identifying Number (if you know it):

### Section 2. Information about the support of the work under consideration for publication.

Did you or your institution at any time receive payment or support in kind for any aspect of the submitted work (including but not limited to grants, data monitoring board, study design, manuscript preparation, statistical analysis, etc...)?

No

Yes, specify nature of compensation

### Section 3. Information about relevant financial relationships outside the submitted work.

Place a check in the appropriate boxes in the table to indicate whether you have financial relationships (regardless of amount of compensation) with any entities that have an interest related to the submitted work. Use one line for each entity; add as many lines as you need. Use the comments column to indicate any additional information that you think a reader or editor would want to know about the compensation. Report relationships that were present during the 36 months prior to submission. In addition please disclose relationships that fall outside the 36-month window that readers may want to know about and could reasonably criticize you for not disclosing (for example, long-term financial relationships that are now ended).

If you have more than one relationship, click "Add +" to add a row. Click "Del x" to delete an extra row.

| Type of Relationship (in alphabetical order) | No                                  | Money Paid to You                   | Money to Your institution | Entity       | Comments |       |
|----------------------------------------------|-------------------------------------|-------------------------------------|---------------------------|--------------|----------|-------|
| Board membership                             | <input checked="" type="checkbox"/> | <input type="checkbox"/>            | <input type="checkbox"/>  |              |          | Del x |
|                                              |                                     |                                     |                           |              |          | Add + |
| Consultancy                                  | <input type="checkbox"/>            | <input checked="" type="checkbox"/> | <input type="checkbox"/>  | Astra Zeneca |          | Del x |
| Consultancy                                  | <input type="checkbox"/>            | <input checked="" type="checkbox"/> | <input type="checkbox"/>  | Merck        |          | Del x |
| Consultancy                                  | <input type="checkbox"/>            | <input checked="" type="checkbox"/> | <input type="checkbox"/>  | Pfizer       |          | Del x |
| Consultancy                                  | <input type="checkbox"/>            | <input checked="" type="checkbox"/> | <input type="checkbox"/>  | Roche        |          | Del x |
| Consultancy                                  | <input type="checkbox"/>            | <input checked="" type="checkbox"/> | <input type="checkbox"/>  | Solvay       |          | Del x |



**ICMJE Uniform Disclosure Form for Potential Conflicts of Interest**

| Type of Relationship<br>(in alphabetical order)                                                      | No                                  | Money<br>Paid to<br>You             | Money to<br>Your<br>institution     | Entity       | Comments |       |
|------------------------------------------------------------------------------------------------------|-------------------------------------|-------------------------------------|-------------------------------------|--------------|----------|-------|
|                                                                                                      |                                     |                                     |                                     |              |          | Add + |
| Employment                                                                                           | <input checked="" type="checkbox"/> | <input type="checkbox"/>            | <input type="checkbox"/>            |              |          | Del × |
|                                                                                                      |                                     |                                     |                                     |              |          | Add + |
| Expert testimony                                                                                     | <input checked="" type="checkbox"/> | <input type="checkbox"/>            | <input type="checkbox"/>            |              |          | Del × |
|                                                                                                      |                                     |                                     |                                     |              |          | Add + |
| Gifts                                                                                                | <input checked="" type="checkbox"/> | <input type="checkbox"/>            | <input type="checkbox"/>            |              |          | Del × |
|                                                                                                      |                                     |                                     |                                     |              |          | Add + |
| Grants/grants pending                                                                                | <input type="checkbox"/>            | <input type="checkbox"/>            | <input checked="" type="checkbox"/> | Astra Zeneca |          | Del × |
| Grants/grants pending                                                                                | <input type="checkbox"/>            | <input type="checkbox"/>            | <input checked="" type="checkbox"/> | Merck        |          | Del × |
| Grants/grants pending                                                                                | <input type="checkbox"/>            | <input type="checkbox"/>            | <input checked="" type="checkbox"/> | Pfizer       |          | Del × |
| Grants/grants pending                                                                                | <input type="checkbox"/>            | <input type="checkbox"/>            | <input checked="" type="checkbox"/> | Roche        |          | Del × |
|                                                                                                      |                                     |                                     |                                     |              |          | Add + |
| Honoraria                                                                                            | <input type="checkbox"/>            | <input checked="" type="checkbox"/> | <input type="checkbox"/>            | Astra Zeneca |          | Del × |
| Honoraria                                                                                            | <input type="checkbox"/>            | <input checked="" type="checkbox"/> | <input type="checkbox"/>            | Merck        |          | Del × |
| Honoraria                                                                                            | <input type="checkbox"/>            | <input checked="" type="checkbox"/> | <input type="checkbox"/>            | Pfizer       |          | Del × |
| Honoraria                                                                                            | <input type="checkbox"/>            | <input checked="" type="checkbox"/> | <input type="checkbox"/>            | Roche        |          | Del × |
|                                                                                                      |                                     |                                     |                                     |              |          | Add + |
| Payment for manuscript<br>preparation                                                                | <input checked="" type="checkbox"/> | <input type="checkbox"/>            | <input type="checkbox"/>            |              |          | Del × |
|                                                                                                      |                                     |                                     |                                     |              |          | Add + |
| Patents (planned, pending or<br>issued)                                                              | <input checked="" type="checkbox"/> | <input type="checkbox"/>            | <input type="checkbox"/>            |              |          | Del × |
|                                                                                                      |                                     |                                     |                                     |              |          | Add + |
| Royalties                                                                                            | <input checked="" type="checkbox"/> | <input type="checkbox"/>            | <input type="checkbox"/>            |              |          | Del × |
|                                                                                                      |                                     |                                     |                                     |              |          | Add + |
| Payment for development of<br>educational presentations<br>including service on speakers'<br>bureaus | <input type="checkbox"/>            | <input checked="" type="checkbox"/> | <input type="checkbox"/>            | Astra Zeneca |          | Del × |
| Payment for development of<br>educational presentations<br>including service on speakers'<br>bureaus | <input type="checkbox"/>            | <input checked="" type="checkbox"/> | <input type="checkbox"/>            | Merck        |          | Del × |



**ICMJE Uniform Disclosure Form for Potential Conflicts of Interest**

| Type of Relationship (in alphabetical order)                                                | No                                  | Money Paid to You                   | Money to Your institution | Entity | Comments |       |
|---------------------------------------------------------------------------------------------|-------------------------------------|-------------------------------------|---------------------------|--------|----------|-------|
| Payment for development of educational presentations including service on speakers' bureaus | <input type="checkbox"/>            | <input checked="" type="checkbox"/> | <input type="checkbox"/>  | Pfizer |          | Del × |
|                                                                                             |                                     |                                     |                           |        |          | Add + |
| Stock/stock options                                                                         | <input checked="" type="checkbox"/> | <input type="checkbox"/>            | <input type="checkbox"/>  |        |          | Del × |
|                                                                                             |                                     |                                     |                           |        |          | Add + |
| Travel/accommodations expenses covered or reimbursed                                        | <input checked="" type="checkbox"/> | <input type="checkbox"/>            | <input type="checkbox"/>  |        |          | Del × |
|                                                                                             |                                     |                                     |                           |        |          | Add + |
| Other (err on the side of full disclosure)                                                  | <input checked="" type="checkbox"/> | <input type="checkbox"/>            | <input type="checkbox"/>  |        |          | Del × |
|                                                                                             |                                     |                                     |                           |        |          | Add + |

**Section 4. Information about financial relationships involving your spouse or partner or your children (under 18 years of age).**

Do your children or your spouse or partner have financial relationships with entities that have an interest in the content of the submitted work?

- No other relationships/conditions/circumstances that present potential conflict of interest
- Yes, the following relationships/conditions/circumstances are present (explain below):

**Section 5. Information about relevant nonfinancial associations.**

Do you have any relevant nonfinancial associations or interests (personal, professional, political, institutional, religious, or other) that a reasonable reader would want to know about in relation to the submitted work?

- No relevant nonfinancial relationships/conditions/circumstances to report.
- Yes, the following relevant nonfinancial relationships/conditions/circumstances are present (explain below):

At the time of manuscript acceptance, journals will ask authors to confirm and, if necessary, update their disclosure statements. On occasion, journals may ask authors to disclose further information about reported relationships.

Save Form

## **ICMJE Uniform Disclosure Form for Potential Conflicts of Interest**

### **INSTRUCTIONS:**

The purpose of this form is to provide readers of your manuscript with information about your other interests that could influence how they receive and understand your work. The form has five parts.

#### **1. Identifying information.**

Each author should submit a separate form. Provide complete information and double-check the manuscript number. If you are NOT the corresponding author please insert his or her name.

#### **2. The work under consideration for publication.**

Please provide information about the work that you have submitted for publication. The time frame for this reporting is that of the work itself, from the initial conception and planning to the present. The idea is to provide for the reader information about resources that you received, either directly or indirectly (via your institution), to enable you to complete the work. If you check the "No" box it means that you did the work without receiving any financial support from any third party -- that is, the work was supported by funds from the same institution that pays your salary and that institution did not receive third-party funds to pay you. If you or your institution did receive funds from a third party to support the work, check "Yes" along with the appropriate boxes to indicate the type of support and whether you or your institution received it.

#### **3. Relevant financial activities outside the submitted work.**

Please report all sources of revenue relevant to the submitted work that accrued either directly to you or were paid to your institution on your behalf over the 36 months prior to submission of the work. This should include all monies from sources with relevance to the submitted work, not just monies from the entity that sponsored the research. If there is any question, it is usually better to disclose a relationship than not to do so. Please note that your interactions with the work's sponsor outside the submitted work should be listed here. For each category list each entity on a separate line. Use as many lines as necessary to provide complete information. In addition, please disclose relationships that fall outside the 36-month window that readers may want to know about and could reasonably criticize you for not disclosing (for example, long-term financial relationships that are now ended).

The goal of this section is to provide information for our reviewers and readers about your interactions with entities in the biomedical arena that could be perceived to influence, or that give the appearance of potentially influencing, what you wrote in the submitted work. You should disclose interactions with ANY entity that could be considered broadly relevant to the work. For example, if your article is about testing an epidermal growth factor receptor (EGFR) antagonist in lung cancer, you should report all associations with entities pursuing diagnostic or therapeutic strategies in cancer in general, not just in the area of EGFR or lung cancer. For grants you have received for work outside the submitted work, you should disclose support ONLY from entities that could be perceived to benefit financially from the published work, such as drug companies, or foundations supported by entities that could be perceived to have a financial stake in the outcome. Public funding sources, such as the NIH or the MRC, need not be disclosed. For example, if the NIH sponsored a piece of work you have been involved in but drugs were provided by a pharmaceutical company, you need only list the pharmaceutical company.

#### **4. Financial relationships involving your spouse or partner or your children (under 18 years of age).**

If monies from the types of relationships listed in Section 3 were paid to your spouse or partner or dependent children, please list the type of activity and source of the money.

#### **5. Nonfinancial associations.**

Please report any personal, professional, political, institutional, religious, or other associations that a reasonable reader would want to know about in relation to the submitted work.



## ICMJE Uniform Disclosure Form for Potential Conflicts of Interest

### Section 1. Identifying Information.

Given Name:  
(or first)

Peter

Surname:  
(or last)

Linz

Effective Date:

05-February-2010

Format example: 07-August-2008

Are you the corresponding author?  Yes  No

Corresponding author's name:

Henry N. Ginsberg

Manuscript Title:

Effects of Combination Lipid Therapy on Cardiovascular Events in Type 2 Diabetes Mellitus

Manuscript Identifying Number (if you know it):

### Section 2. Information about the support of the work under consideration for publication.

Did you or your institution at any time receive payment or support in kind for any aspect of the submitted work (including but not limited to grants, data monitoring board, study design, manuscript preparation, statistical analysis, etc...)?

No

Yes, specify nature of compensation

If you have more than one relationship, click "Add +" to add a row. Click "Del x" to delete an extra row.

| Type                                                                                                                                 | Money Paid to You*                  |                          | Money to Your Institution           |                                     | Name of Entity             | Comments**                                                                 |       |
|--------------------------------------------------------------------------------------------------------------------------------------|-------------------------------------|--------------------------|-------------------------------------|-------------------------------------|----------------------------|----------------------------------------------------------------------------|-------|
|                                                                                                                                      | No                                  | Yes                      | No                                  | Yes                                 |                            |                                                                            |       |
| Grant                                                                                                                                | <input checked="" type="checkbox"/> | <input type="checkbox"/> | <input checked="" type="checkbox"/> | <input type="checkbox"/>            |                            |                                                                            | Del x |
|                                                                                                                                      |                                     |                          |                                     |                                     |                            |                                                                            | Add + |
| Consulting fee or honorarium                                                                                                         | <input checked="" type="checkbox"/> | <input type="checkbox"/> | <input checked="" type="checkbox"/> | <input type="checkbox"/>            |                            |                                                                            | Del x |
|                                                                                                                                      |                                     |                          |                                     |                                     |                            |                                                                            | Add + |
| Support for travel to meetings for the study or otherwise                                                                            | <input checked="" type="checkbox"/> | <input type="checkbox"/> | <input type="checkbox"/>            | <input checked="" type="checkbox"/> | Henry M Jackson foundation | Reimbursement for cost to attend study meeting for clinical site personnel | Del x |
|                                                                                                                                      |                                     |                          |                                     |                                     |                            |                                                                            | Add + |
| Fees for participation in review activities such as data monitoring boards, statistical analysis, end point committees, and the like | <input checked="" type="checkbox"/> | <input type="checkbox"/> | <input checked="" type="checkbox"/> | <input type="checkbox"/>            |                            |                                                                            | Del x |
|                                                                                                                                      |                                     |                          |                                     |                                     |                            |                                                                            | Add + |
| Payment for writing or reviewing the manuscript                                                                                      | <input checked="" type="checkbox"/> | <input type="checkbox"/> | <input checked="" type="checkbox"/> | <input type="checkbox"/>            |                            |                                                                            | Del x |



**ICMJE Uniform Disclosure Form for Potential Conflicts of Interest**

| Type                                                                                            | Money Paid to You*                  |                          | Money to Your Institution |                                     | Name of Entity           | Comments**                                                                                                                        |       |
|-------------------------------------------------------------------------------------------------|-------------------------------------|--------------------------|---------------------------|-------------------------------------|--------------------------|-----------------------------------------------------------------------------------------------------------------------------------|-------|
|                                                                                                 |                                     |                          |                           |                                     |                          |                                                                                                                                   | Add + |
| Support in kind such as writing, provision of medicines or equipment, or administrative support | <input checked="" type="checkbox"/> | <input type="checkbox"/> | <input type="checkbox"/>  | <input checked="" type="checkbox"/> | ACCORD STUDY             | Provided medication and limited equipment to conduct study                                                                        | Del × |
|                                                                                                 |                                     |                          |                           |                                     |                          |                                                                                                                                   | Add + |
| Other                                                                                           | <input checked="" type="checkbox"/> | <input type="checkbox"/> | <input type="checkbox"/>  | <input checked="" type="checkbox"/> | Henry Jackson Foundation | In Kind Study nursing personnel under cost reimbursement contract with University of Washington to conduct study at clinical site | Del × |
|                                                                                                 |                                     |                          |                           |                                     |                          |                                                                                                                                   | Add + |

\*\*Use this section to provide any needed explanation

**Section 3. Information about relevant financial relationships outside the submitted work.**

Place a check in the appropriate boxes in the table to indicate whether you have financial relationships (regardless of amount of compensation) with any entities that have an interest related to the submitted work. Use one line for each entity; add as many lines as you need. Use the comments column to indicate any additional information that you think a reader or editor would want to know about the compensation. Report relationships that were present during the 36 months prior to submission. In addition please disclose relationships that fall outside the 36-month window that readers may want to know about and could reasonably criticize you for not disclosing (for example, long-term financial relationships that are now ended).

If you have more than one relationship, click "Add +" to add a row. Click "Del ×" to delete an extra row.

| Type of Relationship (in alphabetical order) | No                                  | Money Paid to You        | Money to Your institution | Entity | Comments |       |       |
|----------------------------------------------|-------------------------------------|--------------------------|---------------------------|--------|----------|-------|-------|
| Board membership                             | <input checked="" type="checkbox"/> | <input type="checkbox"/> | <input type="checkbox"/>  |        |          | Del × |       |
|                                              |                                     |                          |                           |        |          |       | Add + |
| Consultancy                                  | <input checked="" type="checkbox"/> | <input type="checkbox"/> | <input type="checkbox"/>  |        |          | Del × |       |
|                                              |                                     |                          |                           |        |          |       | Add + |
| Employment                                   | <input checked="" type="checkbox"/> | <input type="checkbox"/> | <input type="checkbox"/>  |        |          | Del × |       |
|                                              |                                     |                          |                           |        |          |       | Add + |
| Expert testimony                             | <input checked="" type="checkbox"/> | <input type="checkbox"/> | <input type="checkbox"/>  |        |          | Del × |       |
|                                              |                                     |                          |                           |        |          |       | Add + |
| Gifts                                        | <input checked="" type="checkbox"/> | <input type="checkbox"/> | <input type="checkbox"/>  |        |          | Del × |       |



**ICMJE Uniform Disclosure Form for Potential Conflicts of Interest**

| Type of Relationship<br>(in alphabetical order)                                                      | No                                  | Money<br>Paid to<br>You             | Money to<br>Your<br>institution | Entity          | Comments               |       |
|------------------------------------------------------------------------------------------------------|-------------------------------------|-------------------------------------|---------------------------------|-----------------|------------------------|-------|
|                                                                                                      |                                     |                                     |                                 |                 |                        | Add + |
| Grants/grants pending                                                                                | <input checked="" type="checkbox"/> | <input type="checkbox"/>            | <input type="checkbox"/>        |                 |                        | Del × |
|                                                                                                      |                                     |                                     |                                 |                 |                        | Add + |
| Honoraria                                                                                            | <input checked="" type="checkbox"/> | <input type="checkbox"/>            | <input type="checkbox"/>        |                 |                        | Del × |
|                                                                                                      |                                     |                                     |                                 |                 |                        | Add + |
| Payment for manuscript<br>preparation                                                                | <input checked="" type="checkbox"/> | <input type="checkbox"/>            | <input type="checkbox"/>        |                 |                        | Del × |
|                                                                                                      |                                     |                                     |                                 |                 |                        | Add + |
| Patents (planned, pending or<br>issued)                                                              | <input checked="" type="checkbox"/> | <input type="checkbox"/>            | <input type="checkbox"/>        |                 |                        | Del × |
|                                                                                                      |                                     |                                     |                                 |                 |                        | Add + |
| Royalties                                                                                            | <input checked="" type="checkbox"/> | <input type="checkbox"/>            | <input type="checkbox"/>        |                 |                        | Del × |
|                                                                                                      |                                     |                                     |                                 |                 |                        | Add + |
| Payment for development of<br>educational presentations<br>including service on speakers'<br>bureaus | <input checked="" type="checkbox"/> | <input type="checkbox"/>            | <input type="checkbox"/>        |                 |                        | Del × |
|                                                                                                      |                                     |                                     |                                 |                 |                        | Add + |
| Stock/stock options                                                                                  | <input type="checkbox"/>            | <input checked="" type="checkbox"/> | <input type="checkbox"/>        | Pfizer INC      | Common Stock Ownership | Del × |
| Stock/stock options                                                                                  | <input type="checkbox"/>            | <input checked="" type="checkbox"/> | <input type="checkbox"/>        | Novartis AG     | Common Stock Ownership | Del × |
| Stock/stock options                                                                                  | <input type="checkbox"/>            | <input checked="" type="checkbox"/> | <input type="checkbox"/>        | Astra Zenca PLC | Common Stock Ownership | Del × |
|                                                                                                      |                                     |                                     |                                 |                 |                        | Add + |
| Travel/accommodations<br>expenses covered or<br>reimbursed                                           | <input checked="" type="checkbox"/> | <input type="checkbox"/>            | <input type="checkbox"/>        |                 |                        | Del × |
|                                                                                                      |                                     |                                     |                                 |                 |                        | Add + |
| Other (err on the side of full<br>disclosure)                                                        | <input checked="" type="checkbox"/> | <input type="checkbox"/>            | <input type="checkbox"/>        |                 |                        | Del × |
|                                                                                                      |                                     |                                     |                                 |                 |                        | Add + |

## **ICMJE Uniform Disclosure Form for Potential Conflicts of Interest**

### **Section 4. Information about financial relationships involving your spouse or partner or your children (under 18 years of age).**

Do your children or your spouse or partner have financial relationships with entities that have an interest in the content of the submitted work?

- No other relationships/conditions/circumstances that present potential conflict of interest
- Yes, the following relationships/conditions/circumstances are present (explain below):

### **Section 5. Information about relevant nonfinancial associations.**

Do you have any relevant nonfinancial associations or interests (personal, professional, political, institutional, religious, or other) that a reasonable reader would want to know about in relation to the submitted work?

- No relevant nonfinancial relationships/conditions/circumstances to report.
- Yes, the following relevant nonfinancial relationships/conditions/circumstances are present (explain below):

At the time of manuscript acceptance, journals will ask authors to confirm and, if necessary, update their disclosure statements. On occasion, journals may ask authors to disclose further information about reported relationships.

Save Form

## ICMJE Uniform Disclosure Form for Potential Conflicts of Interest

### INSTRUCTIONS:

The purpose of this form is to provide readers of your manuscript with information about your other interests that could influence how they receive and understand your work. The form has five parts.

#### 1. Identifying information.

Each author should submit a separate form. Provide complete information and double-check the manuscript number. If you are NOT the corresponding author please insert his or her name.

#### 2. The work under consideration for publication.

Please provide information about the work that you have submitted for publication. The time frame for this reporting is that of the work itself, from the initial conception and planning to the present. The idea is to provide for the reader information about resources that you received, either directly or indirectly (via your institution), to enable you to complete the work. If you check the "No" box it means that you did the work without receiving any financial support from any third party -- that is, the work was supported by funds from the same institution that pays your salary and that institution did not receive third-party funds to pay you. If you or your institution did receive funds from a third party to support the work, check "Yes" along with the appropriate boxes to indicate the type of support and whether you or your institution received it.

#### 3. Relevant financial activities outside the submitted work.

Please report all sources of revenue relevant to the submitted work that accrued either directly to you or were paid to your institution on your behalf over the 36 months prior to submission of the work. This should include all monies from sources with relevance to the submitted work, not just monies from the entity that sponsored the research. If there is any question, it is usually better to disclose a relationship than not to do so. Please note that your interactions with the work's sponsor outside the submitted work should be listed here. For each category list each entity on a separate line. Use as many lines as necessary to provide complete information. In addition, please disclose relationships that fall outside the 36-month window that readers may want to know about and could reasonably criticize you for not disclosing (for example, long-term financial relationships that are now ended).

The goal of this section is to provide information for our reviewers and readers about your interactions with entities in the bio-medical arena that could be perceived to influence, or that give the appearance of potentially influencing, what you wrote in the submitted work. You should disclose interactions with ANY entity that could be considered broadly relevant to the work. For example, if your article is about testing an epidermal growth factor receptor (EGFR) antagonist in lung cancer, you should report all associations with entities pursuing diagnostic or therapeutic strategies in cancer in general, not just in the area of EGFR or lung cancer. For grants you have received for work outside the submitted work, you should disclose support ONLY from entities that could be perceived to benefit financially from the published work, such as drug companies, or foundations supported by entities that could be perceived to have a financial stake in the outcome. Public funding sources, such as the NIH or the MRC, need not be disclosed. For example, if the NIH sponsored a piece of work you have been involved in but drugs were provided by a pharmaceutical company, you need only list the pharmaceutical company.

#### 4. Financial relationships involving your spouse or partner or your children (under 18 years of age).

If monies from the types of relationships listed in Section 3 were paid to your spouse or partner or dependent children, please list the type of activity and source of the money.

#### 5. Nonfinancial associations.

Please report any personal, professional, political, institutional, religious, or other associations that a reasonable reader would want to know about in relation to the submitted work.



## ICMJE Uniform Disclosure Form for Potential Conflicts of Interest

### Section 1. Identifying Information.

Given Name:  Surname:  Effective Date:

(or first)

(or last)

Format example: 07-August-2008

Are you the corresponding author?  Yes  No

Corresponding author's name:

Manuscript Title:

Manuscript Identifying Number (if you know it):

### Section 2. Information about the support of the work under consideration for publication.

Did you or your institution at any time receive payment or support in kind for any aspect of the submitted work (including but not limited to grants, data monitoring board, study design, manuscript preparation, statistical analysis, etc...)?

No

Yes, specify nature of compensation

### Section 3. Information about relevant financial relationships outside the submitted work.

Place a check in the appropriate boxes in the table to indicate whether you have financial relationships (regardless of amount of compensation) with any entities that have an interest related to the submitted work. Use one line for each entity; add as many lines as you need. Use the comments column to indicate any additional information that you think a reader or editor would want to know about the compensation. Report relationships that were present during the 36 months prior to submission. In addition please disclose relationships that fall outside the 36-month window that readers may want to know about and could reasonably criticize you for not disclosing (for example, long-term financial relationships that are now ended).

If you have more than one relationship, click "Add +" to add a row. Click "Del x" to delete an extra row.

| Type of Relationship (in alphabetical order) | No                                  | Money Paid to You        | Money to Your institution | Entity | Comments |       |
|----------------------------------------------|-------------------------------------|--------------------------|---------------------------|--------|----------|-------|
| Board membership                             | <input checked="" type="checkbox"/> | <input type="checkbox"/> | <input type="checkbox"/>  |        |          | Del x |
|                                              |                                     |                          |                           |        |          | Add + |
| Consultancy                                  | <input checked="" type="checkbox"/> | <input type="checkbox"/> | <input type="checkbox"/>  |        |          | Del x |
|                                              |                                     |                          |                           |        |          | Add + |
| Employment                                   | <input checked="" type="checkbox"/> | <input type="checkbox"/> | <input type="checkbox"/>  |        |          | Del x |
|                                              |                                     |                          |                           |        |          | Add + |



**ICMJE Uniform Disclosure Form for Potential Conflicts of Interest**

| Type of Relationship<br>(in alphabetical order)                                                      | No                                  | Money<br>Paid to<br>You  | Money to<br>Your<br>institution | Entity | Comments |       |
|------------------------------------------------------------------------------------------------------|-------------------------------------|--------------------------|---------------------------------|--------|----------|-------|
| Expert testimony                                                                                     | <input checked="" type="checkbox"/> | <input type="checkbox"/> | <input type="checkbox"/>        |        |          | Del × |
|                                                                                                      |                                     |                          |                                 |        |          | Add + |
| Gifts                                                                                                | <input checked="" type="checkbox"/> | <input type="checkbox"/> | <input type="checkbox"/>        |        |          | Del × |
|                                                                                                      |                                     |                          |                                 |        |          | Add + |
| Grants/grants pending                                                                                | <input checked="" type="checkbox"/> | <input type="checkbox"/> | <input type="checkbox"/>        |        |          | Del × |
|                                                                                                      |                                     |                          |                                 |        |          | Add + |
| Honoraria                                                                                            | <input checked="" type="checkbox"/> | <input type="checkbox"/> | <input type="checkbox"/>        |        |          | Del × |
|                                                                                                      |                                     |                          |                                 |        |          | Add + |
| Payment for manuscript<br>preparation                                                                | <input checked="" type="checkbox"/> | <input type="checkbox"/> | <input type="checkbox"/>        |        |          | Del × |
|                                                                                                      |                                     |                          |                                 |        |          | Add + |
| Patents (planned, pending or<br>issued)                                                              | <input checked="" type="checkbox"/> | <input type="checkbox"/> | <input type="checkbox"/>        |        |          | Del × |
|                                                                                                      |                                     |                          |                                 |        |          | Add + |
| Royalties                                                                                            | <input checked="" type="checkbox"/> | <input type="checkbox"/> | <input type="checkbox"/>        |        |          | Del × |
|                                                                                                      |                                     |                          |                                 |        |          | Add + |
| Payment for development of<br>educational presentations<br>including service on speakers'<br>bureaus | <input checked="" type="checkbox"/> | <input type="checkbox"/> | <input type="checkbox"/>        |        |          | Del × |
|                                                                                                      |                                     |                          |                                 |        |          | Add + |
| Stock/stock options                                                                                  | <input checked="" type="checkbox"/> | <input type="checkbox"/> | <input type="checkbox"/>        |        |          | Del × |
|                                                                                                      |                                     |                          |                                 |        |          | Add + |
| Travel/accommodations<br>expenses covered or<br>reimbursed                                           | <input checked="" type="checkbox"/> | <input type="checkbox"/> | <input type="checkbox"/>        |        |          | Del × |
|                                                                                                      |                                     |                          |                                 |        |          | Add + |
| Other (err on the side of full<br>disclosure)                                                        | <input checked="" type="checkbox"/> | <input type="checkbox"/> | <input type="checkbox"/>        |        |          | Del × |
|                                                                                                      |                                     |                          |                                 |        |          | Add + |

## **ICMJE Uniform Disclosure Form for Potential Conflicts of Interest**

### **Section 4. Information about financial relationships involving your spouse or partner or your children (under 18 years of age).**

Do your children or your spouse or partner have financial relationships with entities that have an interest in the content of the submitted work?

- No other relationships/conditions/circumstances that present potential conflict of interest
- Yes, the following relationships/conditions/circumstances are present (explain below):

### **Section 5. Information about relevant nonfinancial associations.**

Do you have any relevant nonfinancial associations or interests (personal, professional, political, institutional, religious, or other) that a reasonable reader would want to know about in relation to the submitted work?

- No relevant nonfinancial relationships/conditions/circumstances to report.
- Yes, the following relevant nonfinancial relationships/conditions/circumstances are present (explain below):

At the time of manuscript acceptance, journals will ask authors to confirm and, if necessary, update their disclosure statements. On occasion, journals may ask authors to disclose further information about reported relationships.

Save Form

## **ICMJE Uniform Disclosure Form for Potential Conflicts of Interest**

### **INSTRUCTIONS:**

The purpose of this form is to provide readers of your manuscript with information about your other interests that could influence how they receive and understand your work. The form has five parts.

#### **1. Identifying information.**

Each author should submit a separate form. Provide complete information and double-check the manuscript number. If you are NOT the corresponding author please insert his or her name.

#### **2. The work under consideration for publication.**

Please provide information about the work that you have submitted for publication. The time frame for this reporting is that of the work itself, from the initial conception and planning to the present. The idea is to provide for the reader information about resources that you received, either directly or indirectly (via your institution), to enable you to complete the work. If you check the "No" box it means that you did the work without receiving any financial support from any third party -- that is, the work was supported by funds from the same institution that pays your salary and that institution did not receive third-party funds to pay you. If you or your institution did receive funds from a third party to support the work, check "Yes" along with the appropriate boxes to indicate the type of support and whether you or your institution received it.

#### **3. Relevant financial activities outside the submitted work.**

Please report all sources of revenue relevant to the submitted work that accrued either directly to you or were paid to your institution on your behalf over the 36 months prior to submission of the work. This should include all monies from sources with relevance to the submitted work, not just monies from the entity that sponsored the research. If there is any question, it is usually better to disclose a relationship than not to do so. Please note that your interactions with the work's sponsor outside the submitted work should be listed here. For each category list each entity on a separate line. Use as many lines as necessary to provide complete information. In addition, please disclose relationships that fall outside the 36-month window that readers may want to know about and could reasonably criticize you for not disclosing (for example, long-term financial relationships that are now ended).

The goal of this section is to provide information for our reviewers and readers about your interactions with entities in the biomedical arena that could be perceived to influence, or that give the appearance of potentially influencing, what you wrote in the submitted work. You should disclose interactions with ANY entity that could be considered broadly relevant to the work. For example, if your article is about testing an epidermal growth factor receptor (EGFR) antagonist in lung cancer, you should report all associations with entities pursuing diagnostic or therapeutic strategies in cancer in general, not just in the area of EGFR or lung cancer. For grants you have received for work outside the submitted work, you should disclose support ONLY from entities that could be perceived to benefit financially from the published work, such as drug companies, or foundations supported by entities that could be perceived to have a financial stake in the outcome. Public funding sources, such as the NIH or the MRC, need not be disclosed. For example, if the NIH sponsored a piece of work you have been involved in but drugs were provided by a pharmaceutical company, you need only list the pharmaceutical company.

#### **4. Financial relationships involving your spouse or partner or your children (under 18 years of age).**

If monies from the types of relationships listed in Section 3 were paid to your spouse or partner or dependent children, please list the type of activity and source of the money.

#### **5. Nonfinancial associations.**

Please report any personal, professional, political, institutional, religious, or other associations that a reasonable reader would want to know about in relation to the submitted work.



## ICMJE Uniform Disclosure Form for Potential Conflicts of Interest

### Section 1. Identifying Information.

Given Name:  Surname:  Effective Date:

Format example: 07-August-2008

Are you the corresponding author?  Yes  No

Corresponding author's name:

Manuscript Title:

Manuscript Identifying Number (if you know it):

### Section 2. Information about the support of the work under consideration for publication.

Did you or your institution at any time receive payment or support in kind for any aspect of the submitted work (including but not limited to grants, data monitoring board, study design, manuscript preparation, statistical analysis, etc...)?

No

Yes, specify nature of compensation

If you have more than one relationship, click "Add +" to add a row. Click "Del x" to delete an extra row.

| Type                                                                                                                                 | Money Paid to You*                  |                          | Money to Your Institution           |                                     | Name of Entity                              | Comments**              |       |
|--------------------------------------------------------------------------------------------------------------------------------------|-------------------------------------|--------------------------|-------------------------------------|-------------------------------------|---------------------------------------------|-------------------------|-------|
|                                                                                                                                      | No                                  | Yes                      | No                                  | Yes                                 |                                             |                         |       |
| Grant                                                                                                                                | <input checked="" type="checkbox"/> | <input type="checkbox"/> | <input type="checkbox"/>            | <input checked="" type="checkbox"/> | University of Washington School of Medicine | Actually a contract     | Del x |
|                                                                                                                                      |                                     |                          |                                     |                                     |                                             |                         | Add + |
| Consulting fee or honorarium                                                                                                         | <input checked="" type="checkbox"/> | <input type="checkbox"/> | <input checked="" type="checkbox"/> | <input type="checkbox"/>            |                                             |                         | Del x |
|                                                                                                                                      |                                     |                          |                                     |                                     |                                             |                         | Add + |
| Support for travel to meetings for the study or otherwise                                                                            | <input checked="" type="checkbox"/> | <input type="checkbox"/> | <input checked="" type="checkbox"/> | <input type="checkbox"/>            | University of Washington School of Medicine | As part of the contract | Del x |
|                                                                                                                                      |                                     |                          |                                     |                                     |                                             |                         | Add + |
| Fees for participation in review activities such as data monitoring boards, statistical analysis, end point committees, and the like | <input checked="" type="checkbox"/> | <input type="checkbox"/> | <input checked="" type="checkbox"/> | <input type="checkbox"/>            |                                             |                         | Del x |
|                                                                                                                                      |                                     |                          |                                     |                                     |                                             |                         | Add + |

## ICMJE Uniform Disclosure Form for Potential Conflicts of Interest

| Type                                                                                            | Money Paid to You*                  |                          | Money to Your Institution           |                          | Name of Entity | Comments** |       |
|-------------------------------------------------------------------------------------------------|-------------------------------------|--------------------------|-------------------------------------|--------------------------|----------------|------------|-------|
| Payment for writing or reviewing the manuscript                                                 | <input checked="" type="checkbox"/> | <input type="checkbox"/> | <input checked="" type="checkbox"/> | <input type="checkbox"/> |                |            | Del × |
|                                                                                                 |                                     |                          |                                     |                          |                |            | Add + |
| Support in kind such as writing, provision of medicines or equipment, or administrative support | <input checked="" type="checkbox"/> | <input type="checkbox"/> | <input checked="" type="checkbox"/> | <input type="checkbox"/> |                |            | Del × |
|                                                                                                 |                                     |                          |                                     |                          |                |            | Add + |
| Other                                                                                           | <input checked="" type="checkbox"/> | <input type="checkbox"/> | <input checked="" type="checkbox"/> | <input type="checkbox"/> |                |            | Del × |
|                                                                                                 |                                     |                          |                                     |                          |                |            | Add + |

\*\*Use this section to provide any needed explanation

### Section 3. Information about relevant financial relationships outside the submitted work.

Place a check in the appropriate boxes in the table to indicate whether you have financial relationships (regardless of amount of compensation) with any entities that have an interest related to the submitted work. Use one line for each entity; add as many lines as you need. Use the comments column to indicate any additional information that you think a reader or editor would want to know about the compensation. Report relationships that were present during the 36 months prior to submission. In addition please disclose relationships that fall outside the 36-month window that readers may want to know about and could reasonably criticize you for not disclosing (for example, long-term financial relationships that are now ended).

If you have more than one relationship, click "Add +" to add a row. Click "Del ×" to delete an extra row.

| Type of Relationship (in alphabetical order) | No                                  | Money Paid to You        | Money to Your institution | Entity | Comments |       |
|----------------------------------------------|-------------------------------------|--------------------------|---------------------------|--------|----------|-------|
| Board membership                             | <input checked="" type="checkbox"/> | <input type="checkbox"/> | <input type="checkbox"/>  |        |          | Del × |
|                                              |                                     |                          |                           |        |          | Add + |
| Consultancy                                  | <input checked="" type="checkbox"/> | <input type="checkbox"/> | <input type="checkbox"/>  |        |          | Del × |
|                                              |                                     |                          |                           |        |          | Add + |
| Employment                                   | <input checked="" type="checkbox"/> | <input type="checkbox"/> | <input type="checkbox"/>  |        |          | Del × |
|                                              |                                     |                          |                           |        |          | Add + |
| Expert testimony                             | <input checked="" type="checkbox"/> | <input type="checkbox"/> | <input type="checkbox"/>  |        |          | Del × |
|                                              |                                     |                          |                           |        |          | Add + |
| Gifts                                        | <input checked="" type="checkbox"/> | <input type="checkbox"/> | <input type="checkbox"/>  |        |          | Del × |



**ICMJE Uniform Disclosure Form for Potential Conflicts of Interest**

| Type of Relationship<br>(in alphabetical order)                                                      | No                                  | Money<br>Paid to<br>You  | Money to<br>Your<br>institution     | Entity                                          | Comments                                                                        |       |
|------------------------------------------------------------------------------------------------------|-------------------------------------|--------------------------|-------------------------------------|-------------------------------------------------|---------------------------------------------------------------------------------|-------|
|                                                                                                      |                                     |                          |                                     |                                                 |                                                                                 | Add + |
| Grants/grants pending                                                                                | <input type="checkbox"/>            | <input type="checkbox"/> | <input checked="" type="checkbox"/> | Sanofi Aventis, Boehringer<br>Ingelheim, Abbott | For the following studies:<br>OASIS 7, ORIGIN, ONTARGET,<br>TRANSCEND, AIM-HIGH | Del × |
|                                                                                                      |                                     |                          |                                     |                                                 |                                                                                 | Add + |
| Honoraria                                                                                            | <input checked="" type="checkbox"/> | <input type="checkbox"/> | <input type="checkbox"/>            |                                                 |                                                                                 | Del × |
|                                                                                                      |                                     |                          |                                     |                                                 |                                                                                 | Add + |
| Payment for manuscript<br>preparation                                                                | <input checked="" type="checkbox"/> | <input type="checkbox"/> | <input type="checkbox"/>            |                                                 |                                                                                 | Del × |
|                                                                                                      |                                     |                          |                                     |                                                 |                                                                                 | Add + |
| Patents (planned, pending or<br>issued)                                                              | <input checked="" type="checkbox"/> | <input type="checkbox"/> | <input type="checkbox"/>            |                                                 |                                                                                 | Del × |
|                                                                                                      |                                     |                          |                                     |                                                 |                                                                                 | Add + |
| Royalties                                                                                            | <input checked="" type="checkbox"/> | <input type="checkbox"/> | <input type="checkbox"/>            |                                                 |                                                                                 | Del × |
|                                                                                                      |                                     |                          |                                     |                                                 |                                                                                 | Add + |
| Payment for development of<br>educational presentations<br>including service on speakers'<br>bureaus | <input checked="" type="checkbox"/> | <input type="checkbox"/> | <input type="checkbox"/>            |                                                 |                                                                                 | Del × |
|                                                                                                      |                                     |                          |                                     |                                                 |                                                                                 | Add + |
| Stock/stock options                                                                                  | <input checked="" type="checkbox"/> | <input type="checkbox"/> | <input type="checkbox"/>            |                                                 |                                                                                 | Del × |
|                                                                                                      |                                     |                          |                                     |                                                 |                                                                                 | Add + |
| Travel/accommodations<br>expenses covered or<br>reimbursed                                           | <input checked="" type="checkbox"/> | <input type="checkbox"/> | <input type="checkbox"/>            |                                                 |                                                                                 | Del × |
|                                                                                                      |                                     |                          |                                     |                                                 |                                                                                 | Add + |
| Other (err on the side of full<br>disclosure)                                                        | <input checked="" type="checkbox"/> | <input type="checkbox"/> | <input type="checkbox"/>            |                                                 |                                                                                 | Del × |
|                                                                                                      |                                     |                          |                                     |                                                 |                                                                                 | Add + |

## **ICMJE Uniform Disclosure Form for Potential Conflicts of Interest**

### **Section 4. Information about financial relationships involving your spouse or partner or your children (under 18 years of age).**

Do your children or your spouse or partner have financial relationships with entities that have an interest in the content of the submitted work?

- No other relationships/conditions/circumstances that present potential conflict of interest
- Yes, the following relationships/conditions/circumstances are present (explain below):

### **Section 5. Information about relevant nonfinancial associations.**

Do you have any relevant nonfinancial associations or interests (personal, professional, political, institutional, religious, or other) that a reasonable reader would want to know about in relation to the submitted work?

- No relevant nonfinancial relationships/conditions/circumstances to report.
- Yes, the following relevant nonfinancial relationships/conditions/circumstances are present (explain below):

At the time of manuscript acceptance, journals will ask authors to confirm and, if necessary, update their disclosure statements. On occasion, journals may ask authors to disclose further information about reported relationships.

Save Form

## **ICMJE Uniform Disclosure Form for Potential Conflicts of Interest**

### **INSTRUCTIONS:**

The purpose of this form is to provide readers of your manuscript with information about your other interests that could influence how they receive and understand your work. The form has five parts.

#### **1. Identifying information.**

Each author should submit a separate form. Provide complete information and double-check the manuscript number. If you are NOT the corresponding author please insert his or her name.

#### **2. The work under consideration for publication.**

Please provide information about the work that you have submitted for publication. The time frame for this reporting is that of the work itself, from the initial conception and planning to the present. The idea is to provide for the reader information about resources that you received, either directly or indirectly (via your institution), to enable you to complete the work. If you check the "No" box it means that you did the work without receiving any financial support from any third party -- that is, the work was supported by funds from the same institution that pays your salary and that institution did not receive third-party funds to pay you. If you or your institution did receive funds from a third party to support the work, check "Yes" along with the appropriate boxes to indicate the type of support and whether you or your institution received it.

#### **3. Relevant financial activities outside the submitted work.**

Please report all sources of revenue relevant to the submitted work that accrued either directly to you or were paid to your institution on your behalf over the 36 months prior to submission of the work. This should include all monies from sources with relevance to the submitted work, not just monies from the entity that sponsored the research. If there is any question, it is usually better to disclose a relationship than not to do so. Please note that your interactions with the work's sponsor outside the submitted work should be listed here. For each category list each entity on a separate line. Use as many lines as necessary to provide complete information. In addition, please disclose relationships that fall outside the 36-month window that readers may want to know about and could reasonably criticize you for not disclosing (for example, long-term financial relationships that are now ended).

The goal of this section is to provide information for our reviewers and readers about your interactions with entities in the bio-medical arena that could be perceived to influence, or that give the appearance of potentially influencing, what you wrote in the submitted work. You should disclose interactions with ANY entity that could be considered broadly relevant to the work. For example, if your article is about testing an epidermal growth factor receptor (EGFR) antagonist in lung cancer, you should report all associations with entities pursuing diagnostic or therapeutic strategies in cancer in general, not just in the area of EGFR or lung cancer. For grants you have received for work outside the submitted work, you should disclose support ONLY from entities that could be perceived to benefit financially from the published work, such as drug companies, or foundations supported by entities that could be perceived to have a financial stake in the outcome. Public funding sources, such as the NIH or the MRC, need not be disclosed. For example, if the NIH sponsored a piece of work you have been involved in but drugs were provided by a pharmaceutical company, you need only list the pharmaceutical company.

#### **4. Financial relationships involving your spouse or partner or your children (under 18 years of age).**

If monies from the types of relationships listed in Section 3 were paid to your spouse or partner or dependent children, please list the type of activity and source of the money.

#### **5. Nonfinancial associations.**

Please report any personal, professional, political, institutional, religious, or other associations that a reasonable reader would want to know about in relation to the submitted work.



## ICMJE Uniform Disclosure Form for Potential Conflicts of Interest

### Section 1. Identifying Information.

Given Name:  Surname:  Effective Date:

Format example: 07-August-2008

Are you the corresponding author?  Yes  No

Corresponding author's name:

Manuscript Title:

Manuscript Identifying Number (if you know it):

### Section 2. Information about the support of the work under consideration for publication.

Did you or your institution at any time receive payment or support in kind for any aspect of the submitted work (including but not limited to grants, data monitoring board, study design, manuscript preparation, statistical analysis, etc...)?

No

Yes, specify nature of compensation

### Section 3. Information about relevant financial relationships outside the submitted work.

Place a check in the appropriate boxes in the table to indicate whether you have financial relationships (regardless of amount of compensation) with any entities that have an interest related to the submitted work. Use one line for each entity; add as many lines as you need. Use the comments column to indicate any additional information that you think a reader or editor would want to know about the compensation. Report relationships that were present during the 36 months prior to submission. In addition please disclose relationships that fall outside the 36-month window that readers may want to know about and could reasonably criticize you for not disclosing (for example, long-term financial relationships that are now ended).

If you have more than one relationship, click "Add +" to add a row. Click "Del x" to delete an extra row.

| Type of Relationship (in alphabetical order) | No                                  | Money Paid to You        | Money to Your institution | Entity | Comments |       |
|----------------------------------------------|-------------------------------------|--------------------------|---------------------------|--------|----------|-------|
| Board membership                             | <input checked="" type="checkbox"/> | <input type="checkbox"/> | <input type="checkbox"/>  |        |          | Del x |
|                                              |                                     |                          |                           |        |          | Add + |
| Consultancy                                  | <input checked="" type="checkbox"/> | <input type="checkbox"/> | <input type="checkbox"/>  |        |          | Del x |
|                                              |                                     |                          |                           |        |          | Add + |
| Employment                                   | <input checked="" type="checkbox"/> | <input type="checkbox"/> | <input type="checkbox"/>  |        |          | Del x |
|                                              |                                     |                          |                           |        |          | Add + |



**ICMJE Uniform Disclosure Form for Potential Conflicts of Interest**

| Type of Relationship<br>(in alphabetical order)                                                      | No                                  | Money<br>Paid to<br>You  | Money to<br>Your<br>institution | Entity | Comments |       |
|------------------------------------------------------------------------------------------------------|-------------------------------------|--------------------------|---------------------------------|--------|----------|-------|
| Expert testimony                                                                                     | <input checked="" type="checkbox"/> | <input type="checkbox"/> | <input type="checkbox"/>        |        |          | Del × |
|                                                                                                      |                                     |                          |                                 |        |          | Add + |
| Gifts                                                                                                | <input checked="" type="checkbox"/> | <input type="checkbox"/> | <input type="checkbox"/>        |        |          | Del × |
|                                                                                                      |                                     |                          |                                 |        |          | Add + |
| Grants/grants pending                                                                                | <input checked="" type="checkbox"/> | <input type="checkbox"/> | <input type="checkbox"/>        |        |          | Del × |
|                                                                                                      |                                     |                          |                                 |        |          | Add + |
| Honoraria                                                                                            | <input checked="" type="checkbox"/> | <input type="checkbox"/> | <input type="checkbox"/>        |        |          | Del × |
|                                                                                                      |                                     |                          |                                 |        |          | Add + |
| Payment for manuscript<br>preparation                                                                | <input checked="" type="checkbox"/> | <input type="checkbox"/> | <input type="checkbox"/>        |        |          | Del × |
|                                                                                                      |                                     |                          |                                 |        |          | Add + |
| Patents (planned, pending or<br>issued)                                                              | <input checked="" type="checkbox"/> | <input type="checkbox"/> | <input type="checkbox"/>        |        |          | Del × |
|                                                                                                      |                                     |                          |                                 |        |          | Add + |
| Royalties                                                                                            | <input checked="" type="checkbox"/> | <input type="checkbox"/> | <input type="checkbox"/>        |        |          | Del × |
|                                                                                                      |                                     |                          |                                 |        |          | Add + |
| Payment for development of<br>educational presentations<br>including service on speakers'<br>bureaus | <input checked="" type="checkbox"/> | <input type="checkbox"/> | <input type="checkbox"/>        |        |          | Del × |
|                                                                                                      |                                     |                          |                                 |        |          | Add + |
| Stock/stock options                                                                                  | <input checked="" type="checkbox"/> | <input type="checkbox"/> | <input type="checkbox"/>        |        |          | Del × |
|                                                                                                      |                                     |                          |                                 |        |          | Add + |
| Travel/accommodations<br>expenses covered or<br>reimbursed                                           | <input checked="" type="checkbox"/> | <input type="checkbox"/> | <input type="checkbox"/>        |        |          | Del × |
|                                                                                                      |                                     |                          |                                 |        |          | Add + |
| Other (err on the side of full<br>disclosure)                                                        | <input checked="" type="checkbox"/> | <input type="checkbox"/> | <input type="checkbox"/>        |        |          | Del × |
|                                                                                                      |                                     |                          |                                 |        |          | Add + |

## ICMJE Uniform Disclosure Form for Potential Conflicts of Interest

### Section 4. Information about financial relationships involving your spouse or partner or your children (under 18 years of age).

Do your children or your spouse or partner have financial relationships with entities that have an interest in the content of the submitted work?

- No other relationships/conditions/circumstances that present potential conflict of interest
- Yes, the following relationships/conditions/circumstances are present (explain below):

### Section 5. Information about relevant nonfinancial associations.

Do you have any relevant nonfinancial associations or interests (personal, professional, political, institutional, religious, or other) that a reasonable reader would want to know about in relation to the submitted work?

- No relevant nonfinancial relationships/conditions/circumstances to report.
- Yes, the following relevant nonfinancial relationships/conditions/circumstances are present (explain below):

At the time of manuscript acceptance, journals will ask authors to confirm and, if necessary, update their disclosure statements. On occasion, journals may ask authors to disclose further information about reported relationships.

Save Form
